# Supplementary material for: Green synthesis, in silico modeling, and biological evaluation of N -substituted ( Z )-5-arylidene imidazolidine/thiazolidine-2,4-dione/4-thione derivatives catalyzed by Bu SO 3 H core–shell nanostructures
Source: Royal Society of Chemistry journal article supplement (doi:10.1039/d4ra03881a), 2024-01-01
Supplement: d4ra03881a2.pdf [file d4ra03881a2.pdf]

# Supplementary material

## Green Synthesis, In Silico Modeling, and Biological Evaluation of N-substituted (Z)-5-Arylidene imidazolidine /thiazolidine-2,4-dione/4-thione Derivatives Catalyzed by Bu SO<sub>3</sub>H Core–Shell Nanostructures

Malihe Akhavan<sup>1</sup>, Zohreh Esam<sup>1,2</sup>, Atefeh Mirshafa<sup>3</sup>, Maryam Lotfi<sup>4</sup>, Saeed Pourmand<sup>4</sup>, Froug Ashori<sup>1</sup>, Motahare Rabani<sup>1</sup>, Golbahar Ekbatani<sup>1</sup>, saeed tourani<sup>1</sup>, Reza Beheshti<sup>1</sup>, Zahra Keshavarzian<sup>1</sup>, Zahra Ghanbarimasir<sup>6</sup>, Ahmadreza Bekhradnia\*<sup>1</sup>

<sup>1</sup> Pharmaceutical Sciences Research Center, Department of Medicinal Chemistry, Mazandaran University of Medical Sciences, Sari, Iran

<sup>2</sup>Department of Medicinal Chemistry, School of Pharmacy, Babol University of Medical Sciences, Babol, Iran

<sup>3</sup>Ramsar campus, Mazandaran university of medical sciences, Ramsar.Iran

<sup>4</sup>Department of chemistry, NOVA, school of science and technology, universidade NOVA de lisboa, Portugal

<sup>5</sup>Department of chemical Engineering, Tabriz University of chemical Engineering, Tabriz, Iran

<sup>6</sup>Department of Organic Chemistry, Faculty of Chemistry, university of Mazandaran, Babolsar, Iran

Corresponding author Email: [abekhradnia@mazums.ac.ir](mailto:abekhradnia@mazums.ac.ir); [abekhradnia@gmail.com](mailto:abekhradnia@gmail.com)

### Section 1: The analytical and spectroscopic data for the intermediate compound.

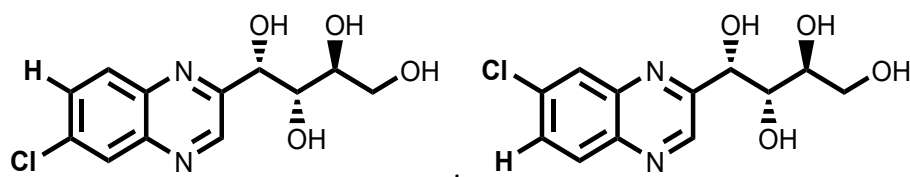

Yield: 85%: mp: 183-187 °C

$C_{12}H_{13}ClN_2O_4$ , MW: 284.70

IR (KBr,  $cm^{-1}$ )  $\nu_{max}$ : 1042.95, 1094.38 (C-OH str.), 3310.2 (O-H str), 2910.8 (C-H str)

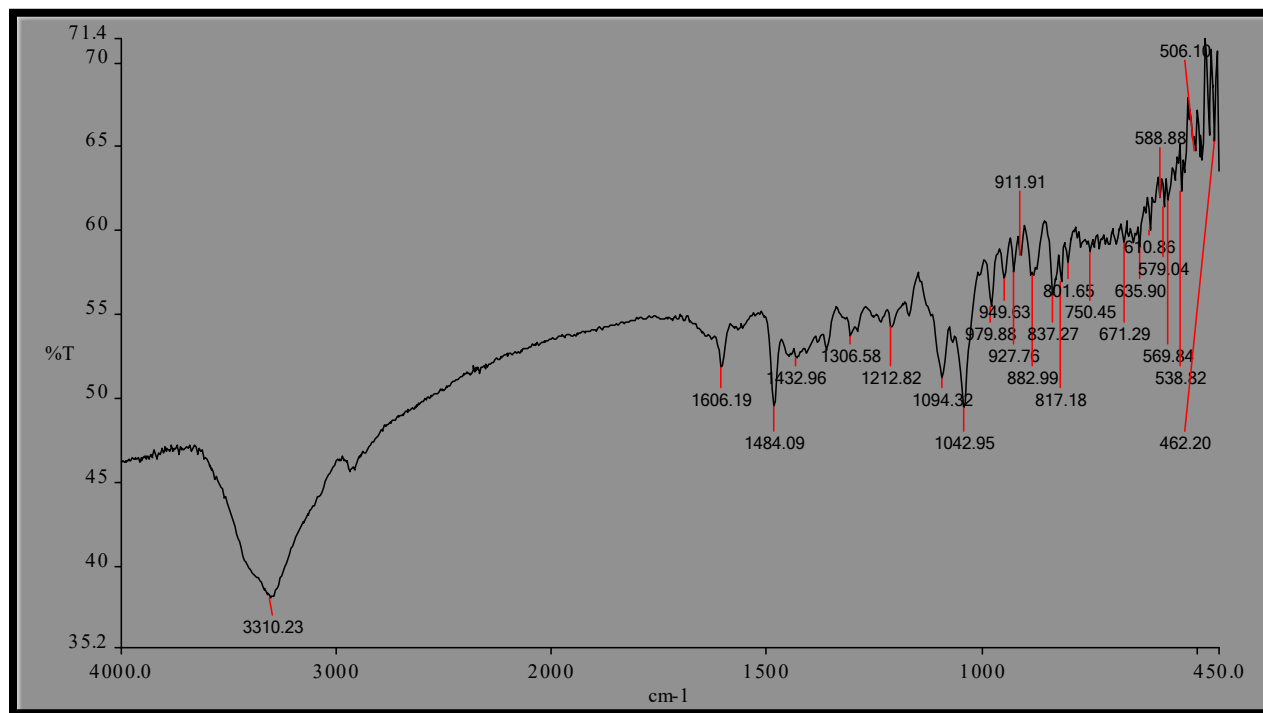

**Fig S1. (FT-IR).** (6-chloroquinoxalin-2-yl) butane-1, 2, 3, 4-tetraol و (7-chloroquinoxalin-2-yl) butane-1, 2, 3, 4-tetraol

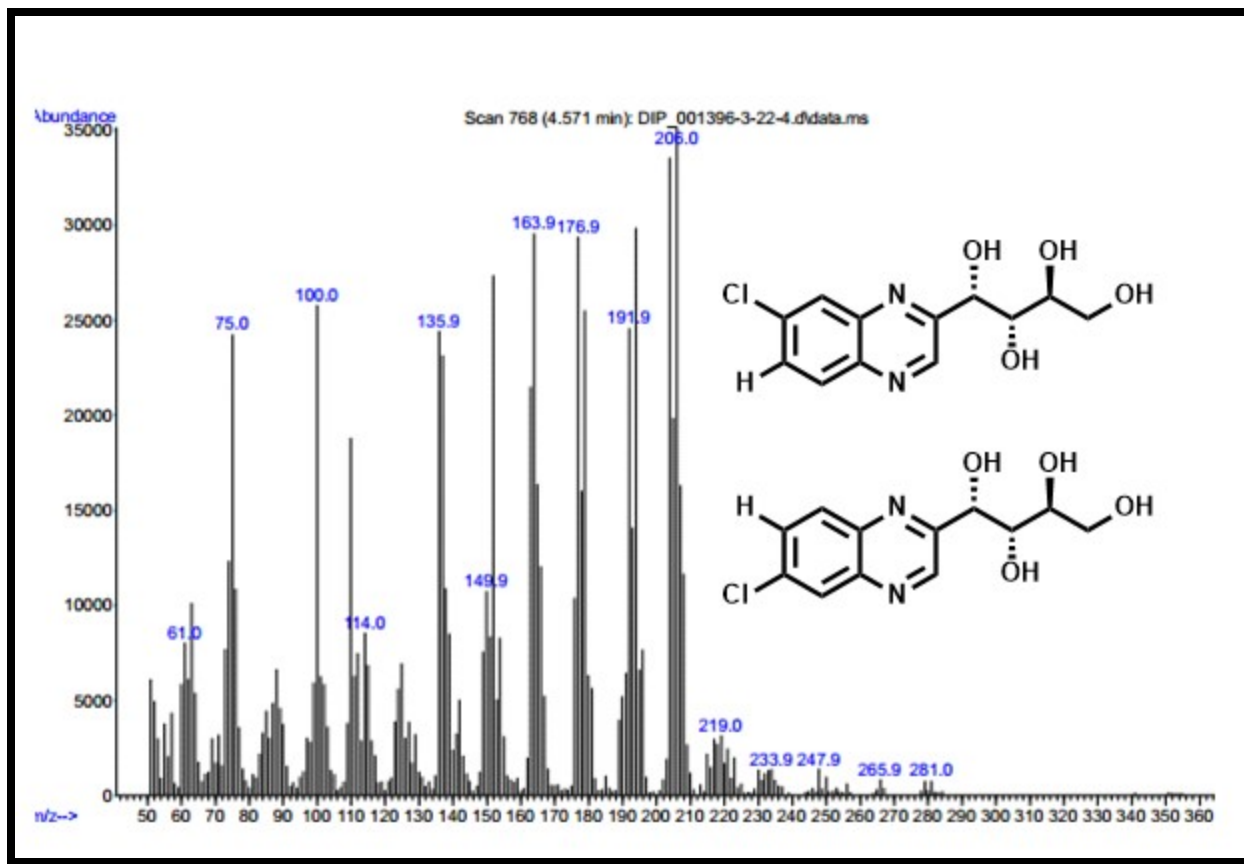

**Fig S2. Mass Spectra.** (6-chloroquinoxalin-2-yl) butane-1, 2, 3, 4-tetraol و (7-chloroquinoxalin-2-yl) butane-1, 2, 3, 4-tetraol

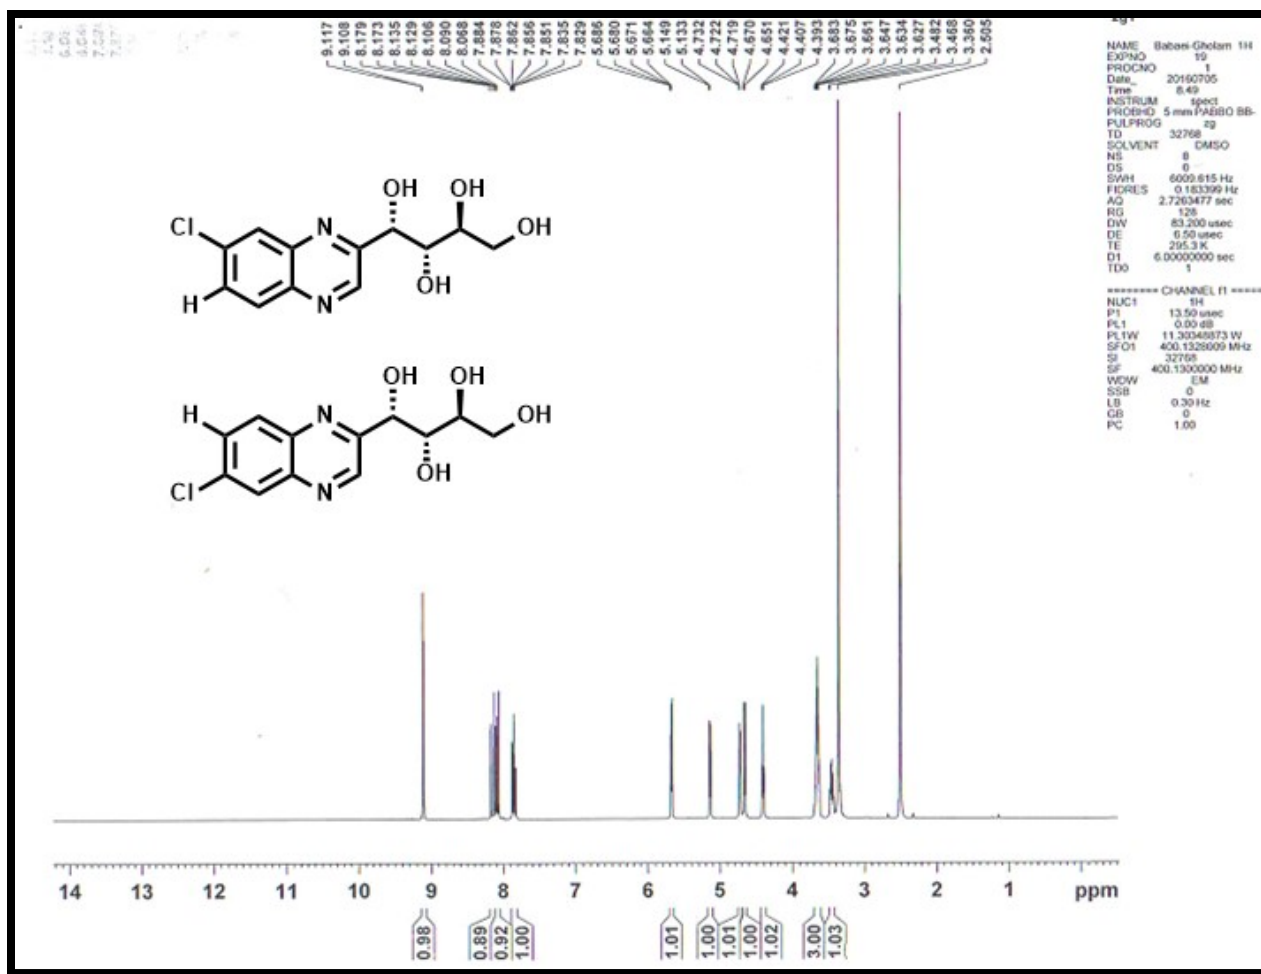

**Fig S3. <sup>1</sup>H NMR spectra.** (6-chloroquinoxalin-2-yl) butane-1, 2, 3, 4-tetraol و (7-chloroquinoxalin-2-yl) butane-1, 2, 3, 4-tetraol

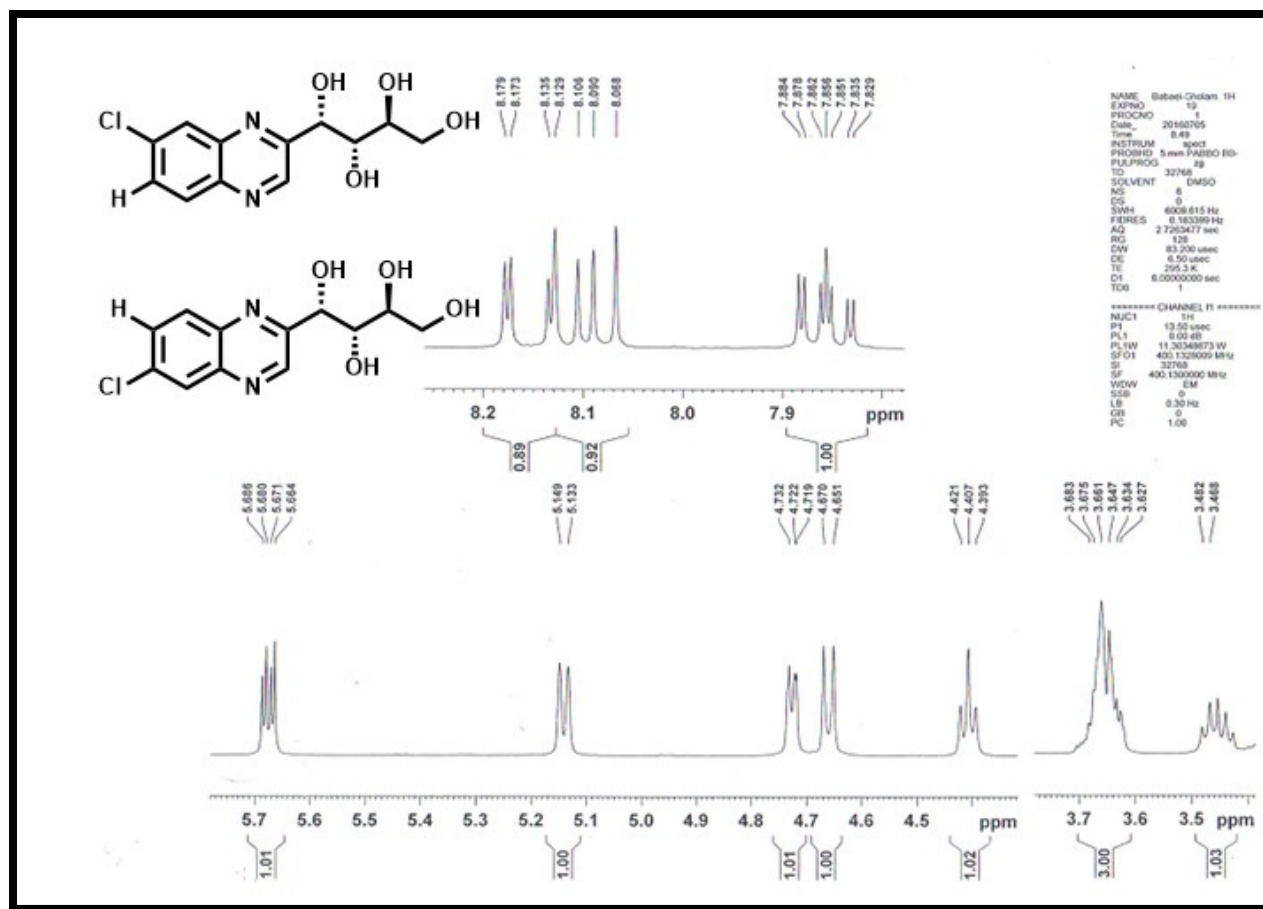

**Fig S4.** <sup>1</sup>H NMR expand spectra. (6-chloroquinoxalin-2-yl) butane-1, 2, 3, 4-tetraol and (7-chloroquinoxalin-2-yl) butane-1, 2, 3, 4-tetraol

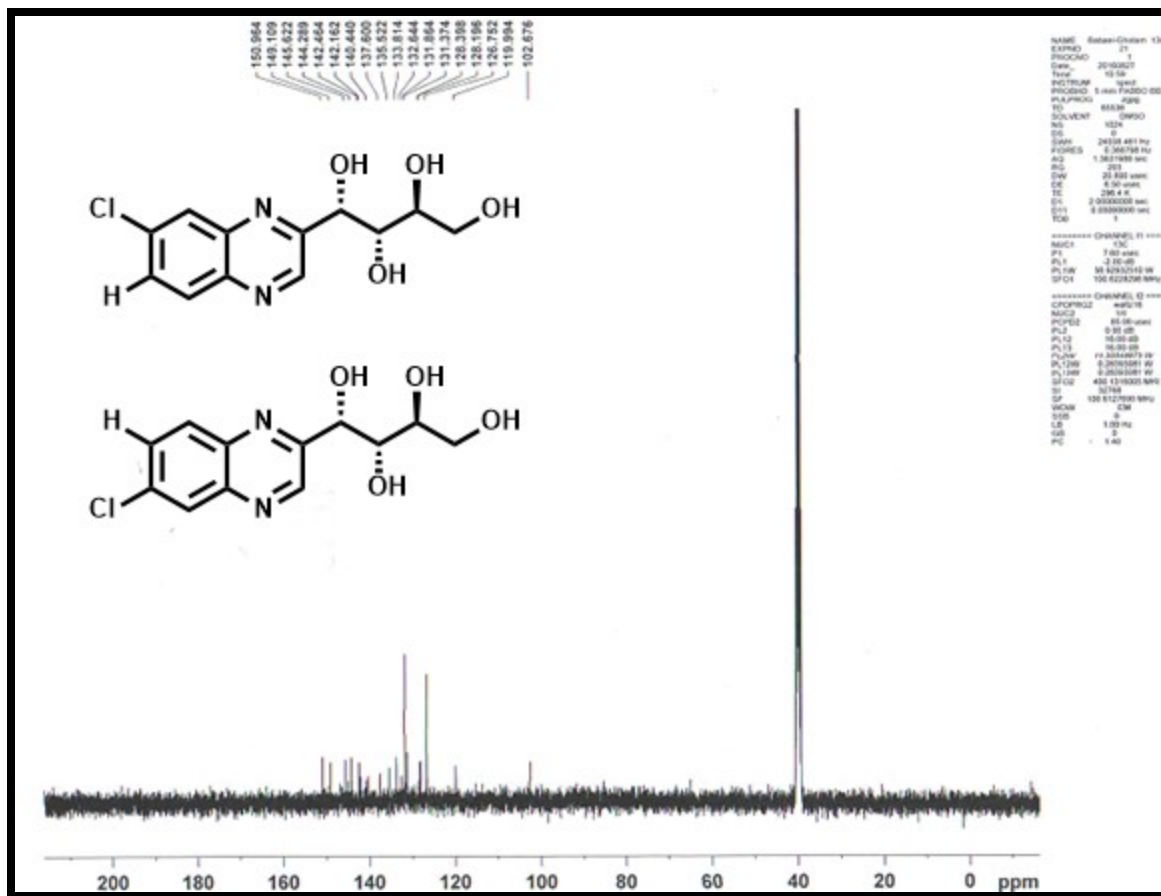

Fig S5. <sup>13</sup>CNMR spectra. (6-chloroquinoxalin-2-yl) butane-1, 2, 3, 4-tetraol و (7-chloroquinoxalin-2-yl) butane-1, 2, 3, 4-tetraol

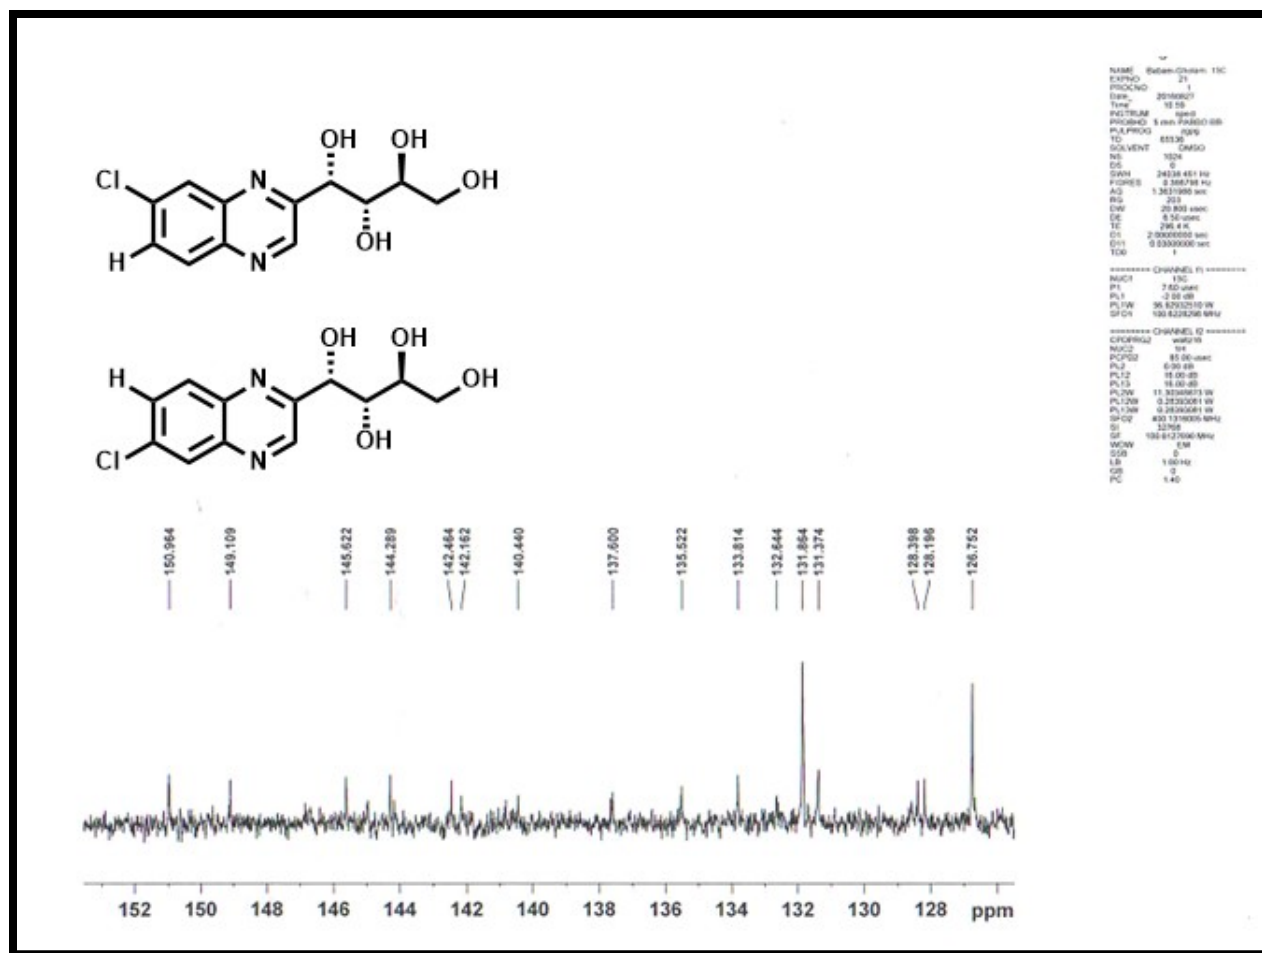

Fig S6.  $^{13}\text{C}$ NMR expand spectra. (6-chloroquinoxalin-2-yl) butane-1, 2, 3, 4-tetraol و (7-chloroquinoxalin-2-yl) butane-1, 2, 3, 4-tetraol.

### 6-chloroquinoxaline-2-carbaldehyde and 7-chloroquinoxaline-2-carbaldehyde

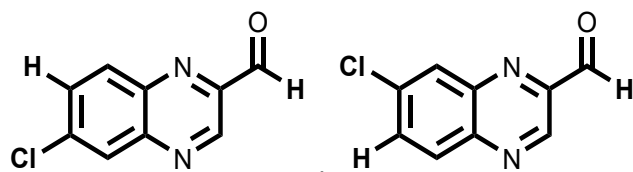

Yield: 86%; mp: 175-183 °C

$\text{C}_9\text{H}_5\text{ClN}_2\text{O}$ , MW: 192.60

IR (KBr,  $\text{cm}^{-1}$ )  $\nu_{\text{max}}$ : 1713.83 (C=O STR.).

$^1\text{H}$  NMR (400 MHz,  $\text{DMSO-d}_6$ )  $\delta$  (ppm): 10.17 (s, 2H, H Aldehyde), 9.38 (s, 1H, 3-H Quinoxaline (compound 4)), 8.41 (d, 1H,  $J = 2.4$  Hz, 8-H Quinoxaline (compound 4)), 8.34 (d, 1H,  $J = 2.4$  Hz, 5-H Quinoxaline), 8.32 (d, 1H,  $J = 8.8$  Hz, 5-H Quinoxaline (compound 4)), 8.25 (d, 1H,  $J = 8.8$  Hz, 8-H Quinoxaline), 8.08 (dd, 1H,  $J = 8.8$  and  $J = 2.4$ , 6-H Quinoxaline), 8.05 (dd, 1H,  $J = 8.8$  and  $J = 2.4$ , 7-H Quinoxaline).

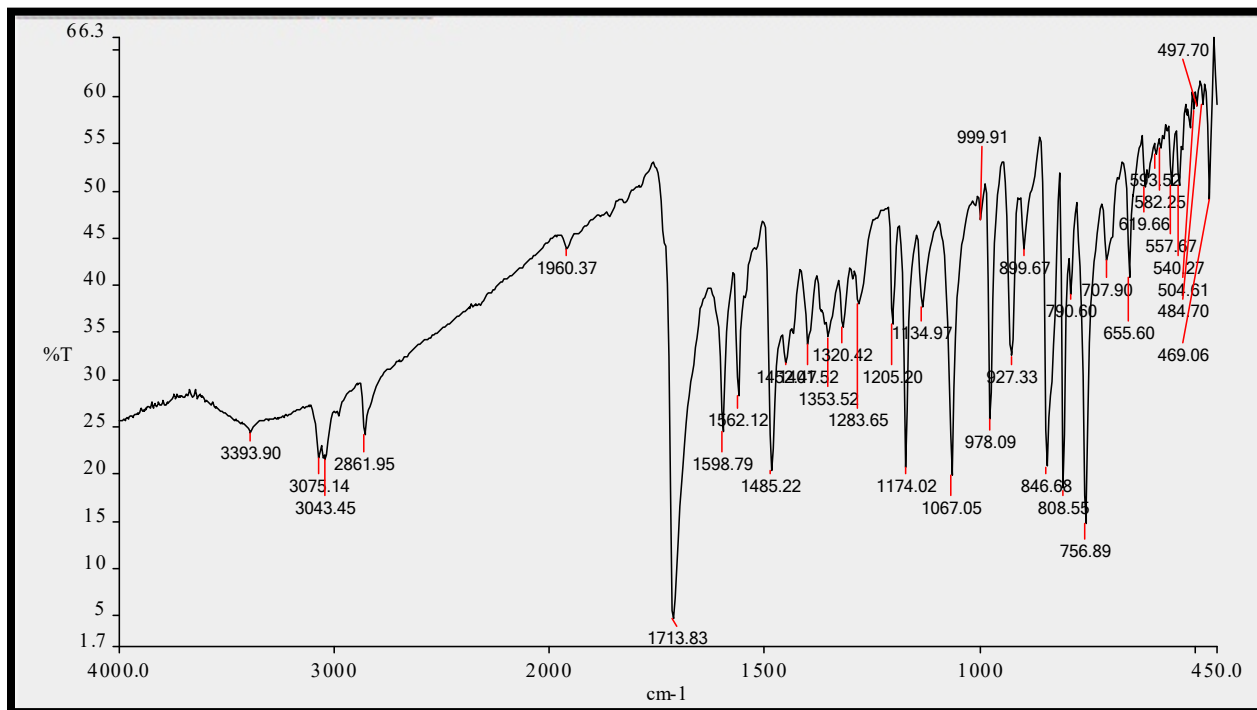

**Fig S7. (FT-IR).** 6-chloroquinoxaline-2-carbaldehyde and 7-chloroquinoxaline-2-carbaldehyde



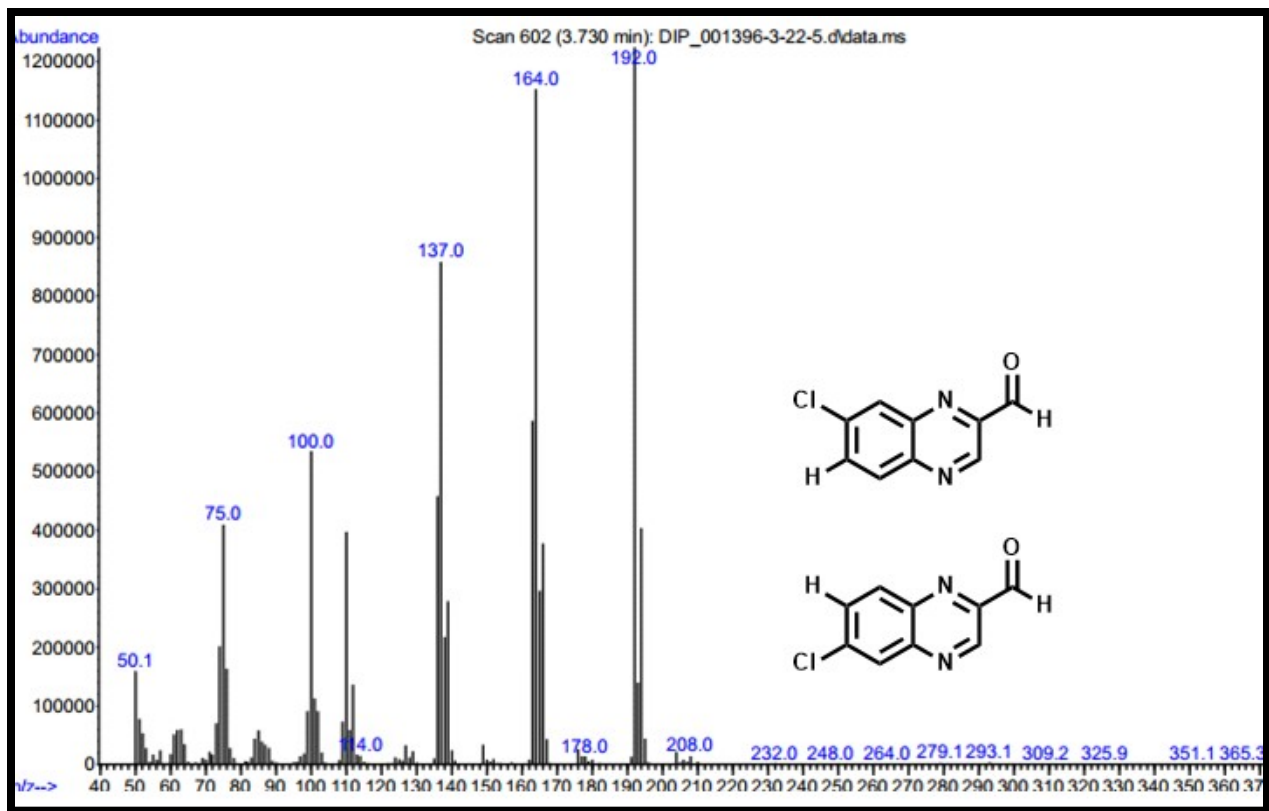

Fig S8. Mass Spectra. 6-chloroquinoxaline-2-carbaldehyde and 7-chloroquinoxaline-2-carbaldehyde

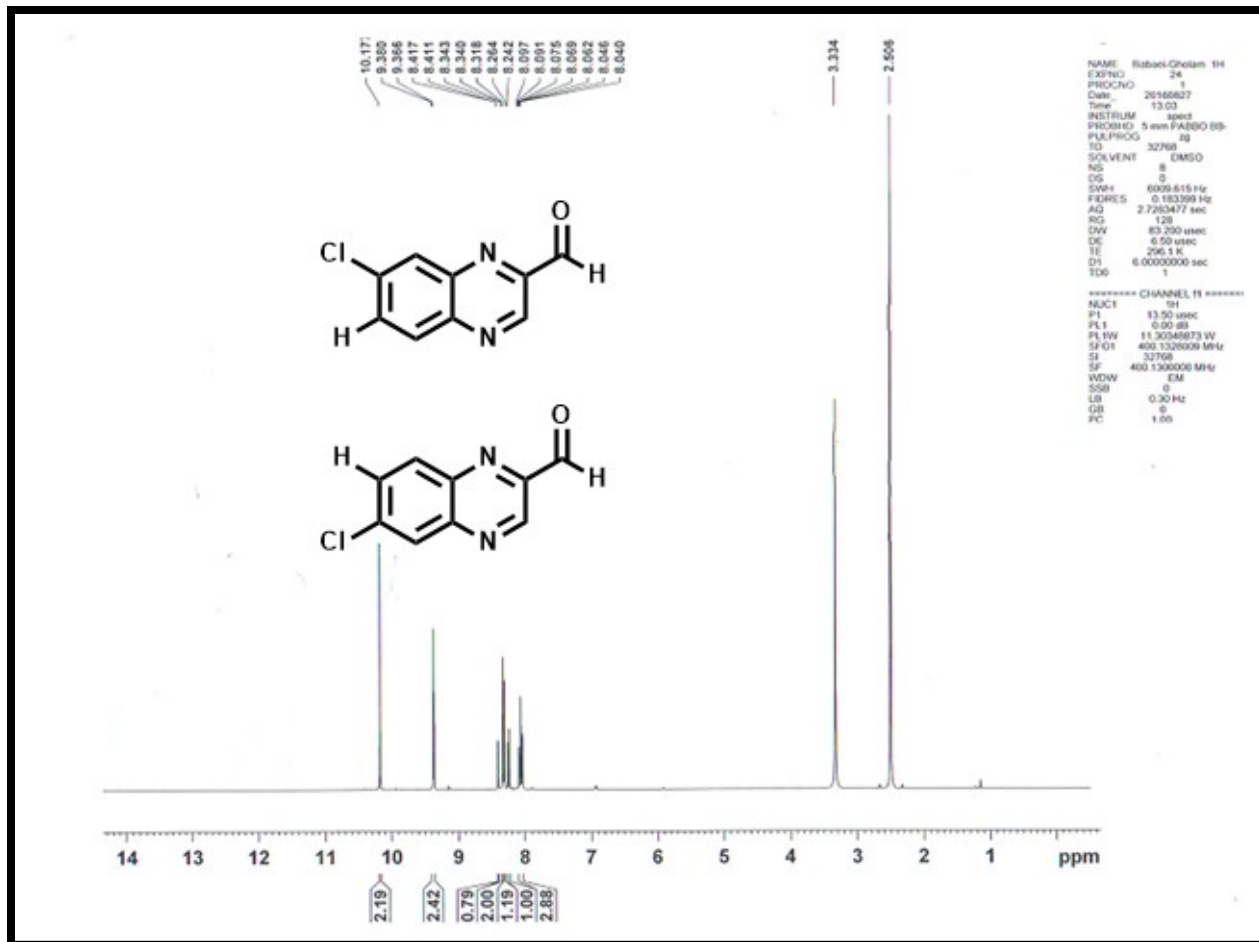

Fig S9. <sup>1</sup>H NMR spectra. 6-chloroquinoxaline-2-carbaldehyde and 7-chloroquinoxaline-2-carbaldehyde

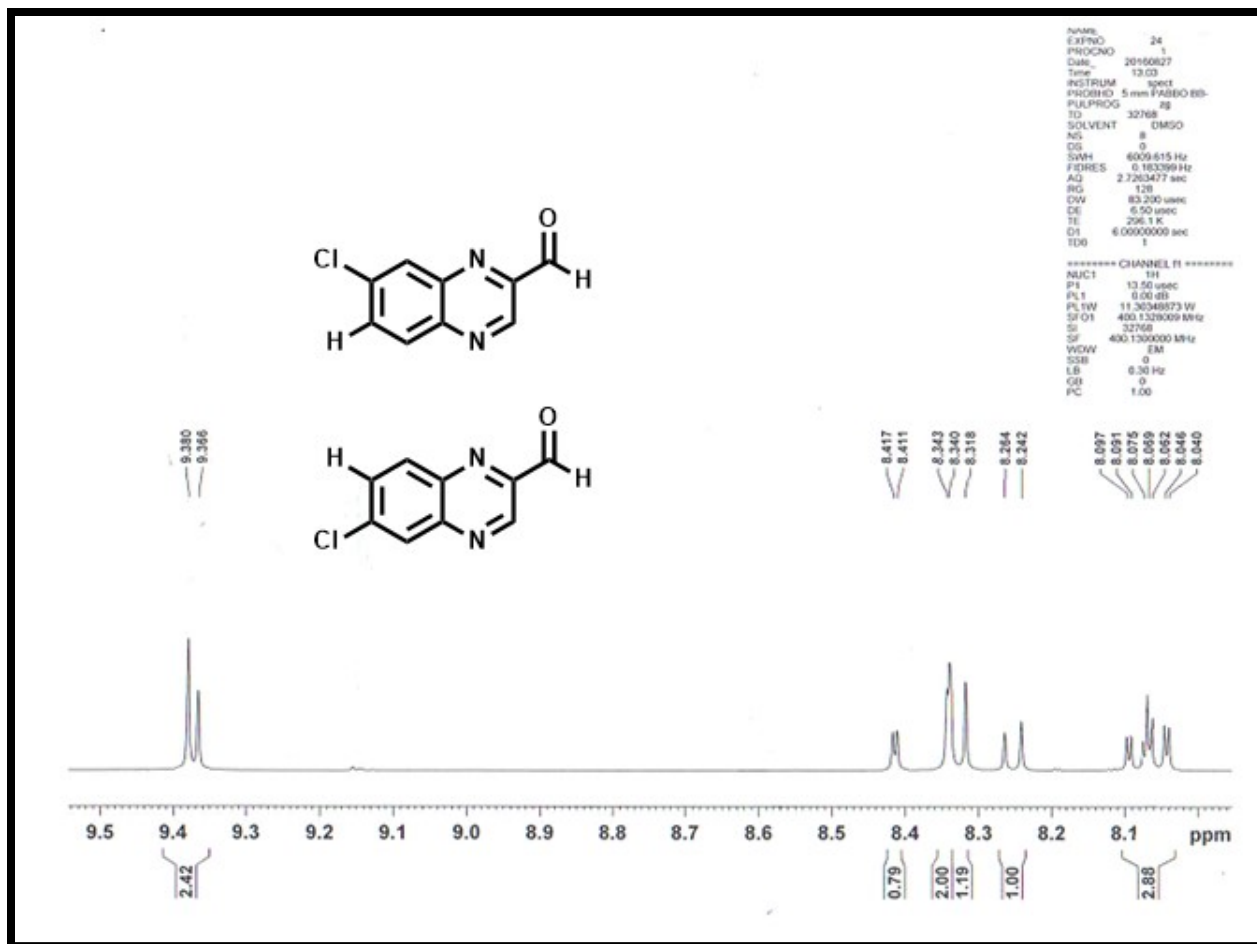

Fig S10. <sup>1</sup>H NMR expand spectra. 6-chloroquinoxaline-2-carbaldehyde and 7-chloroquinoxaline-2-carbaldehyde.

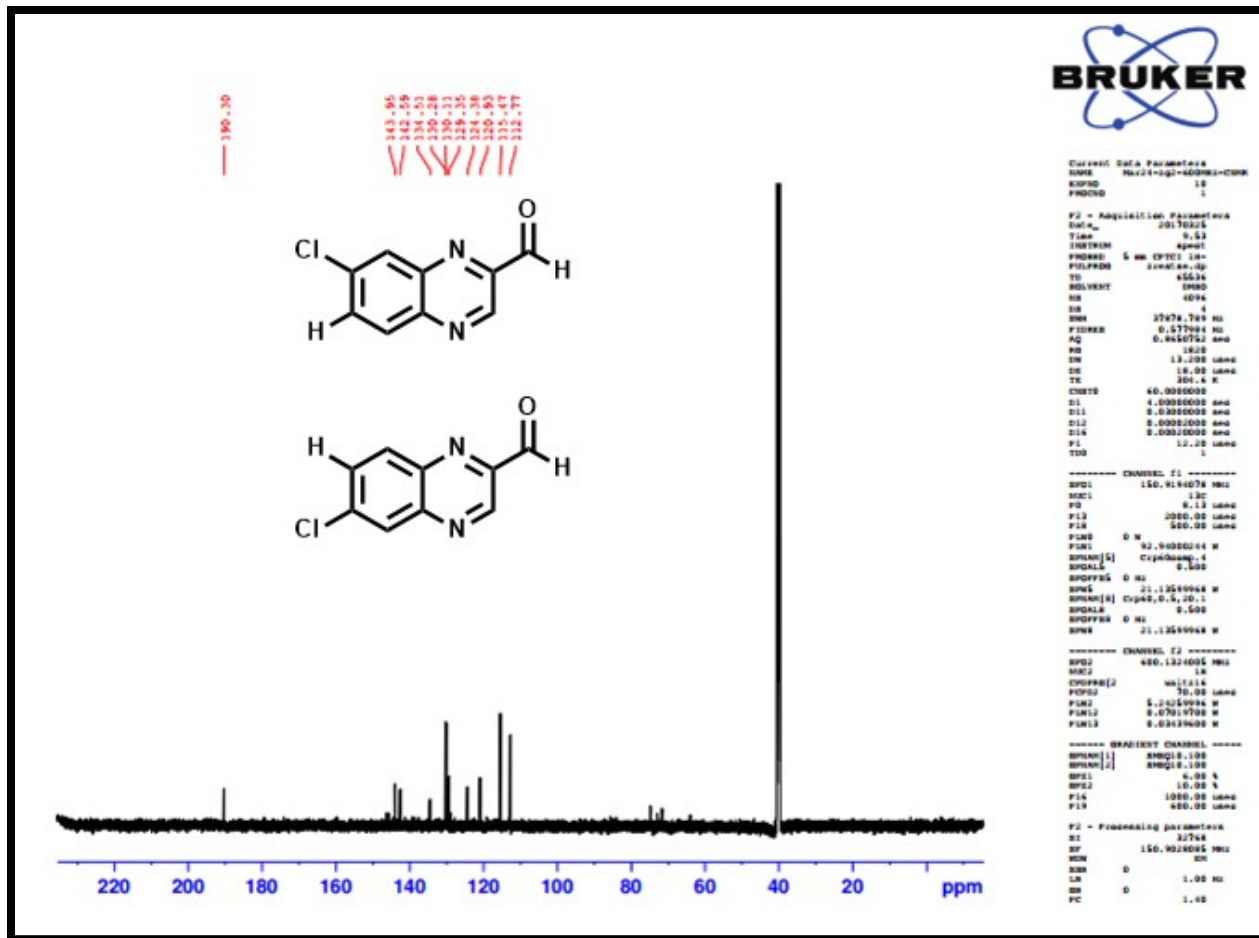

Fig S11. <sup>13</sup>CNMR spectra. 6-chloroquinoxaline-2-carbaldehyde and 7-chloroquinoxaline-2-carbaldehyde.

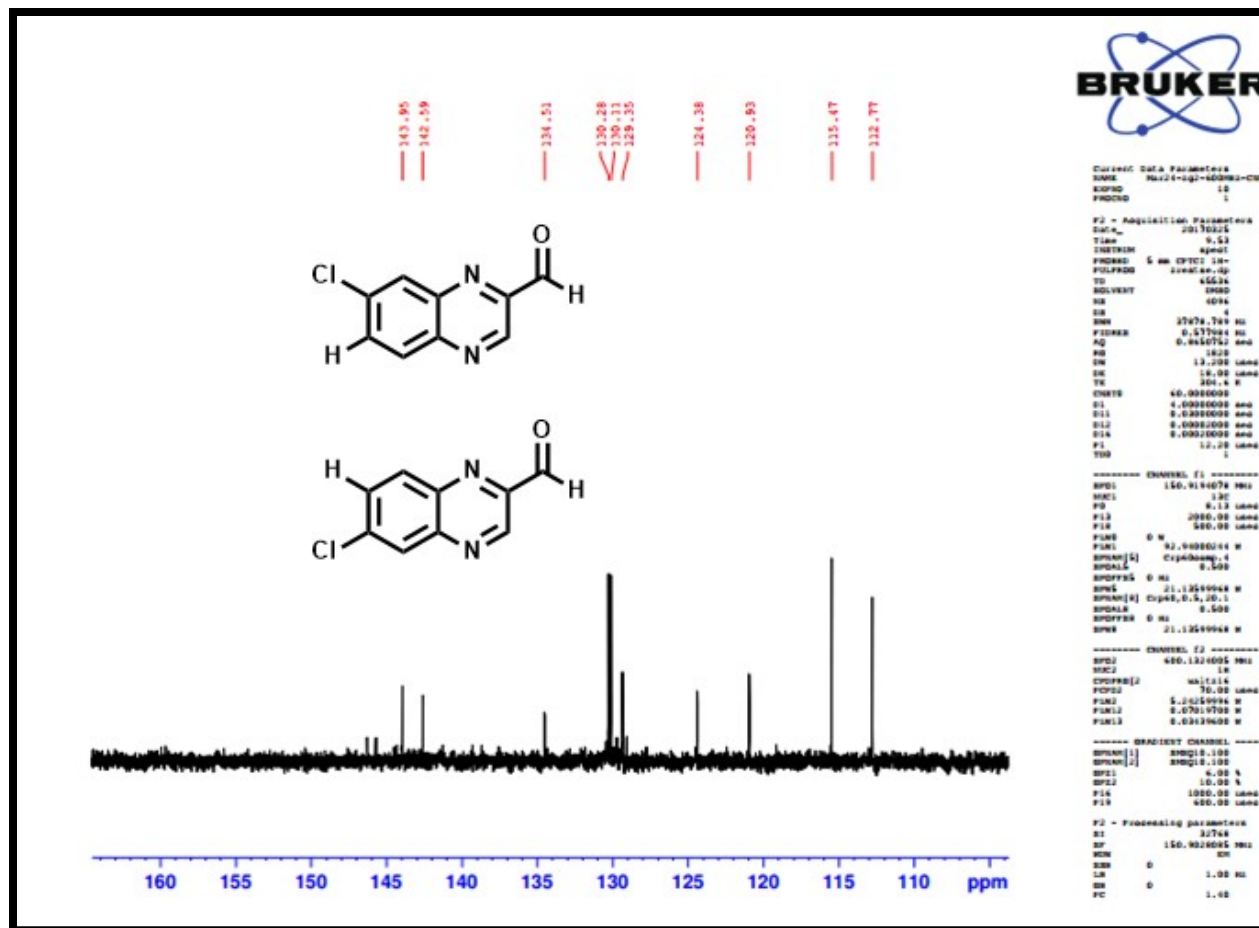

Fig S12. <sup>13</sup>CNMR expand spectra. 6-chloroquinoxaline-2-carbaldehyde and 7-chloroquinoxaline-2-carbaldehyde.

### 1-phenyl-1*H*-pyrazolo[3,4-*b*] quinoxaline-3-carbaldehyde

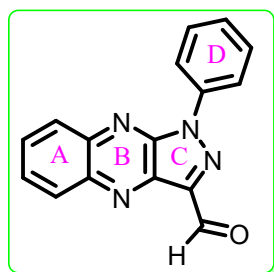

Yellow powder; yield: 91%, mp: 107°C.

C<sub>16</sub>H<sub>10</sub>N<sub>4</sub>O, MW: 274.28 g/mole.

R (KBr, cm<sup>-1</sup>) v: 2861 (CH aldehyde), 1672 (C=O).

$^1\text{H-NMR}$  (400 MHz,  $\text{CDCl}_3$ )  $\delta$  (ppm): 10.46 (s, 1H, Aldehyde), 8.39-8.46 (m, 3H, H-8 Quinoxaline, H-2 and H-6 ring D), 8.31 (d, 1H,  $J = 8.4$  Hz, H-5 Quinoxaline), 7.98-8.12 (m, 2H, H-7 and H-6 Quinoxaline), 7.71-7.88 (AB quartet, 2H,  $J = 7.2$  Hz, H-3 and H-5 ring D), 7.55 (tt, 1H, H-4 ring D,  $J = 7.2$  and 1.2 Hz).  $^{13}\text{C-NMR}$  (400 MHz,  $\text{DMSO-}d_6$ )  $\delta$  (ppm): 114, 116, 122 (Aromatic carbons ring D); 125, 130, 132, 136, 142, 144, 190.0 (C Aldehyde).

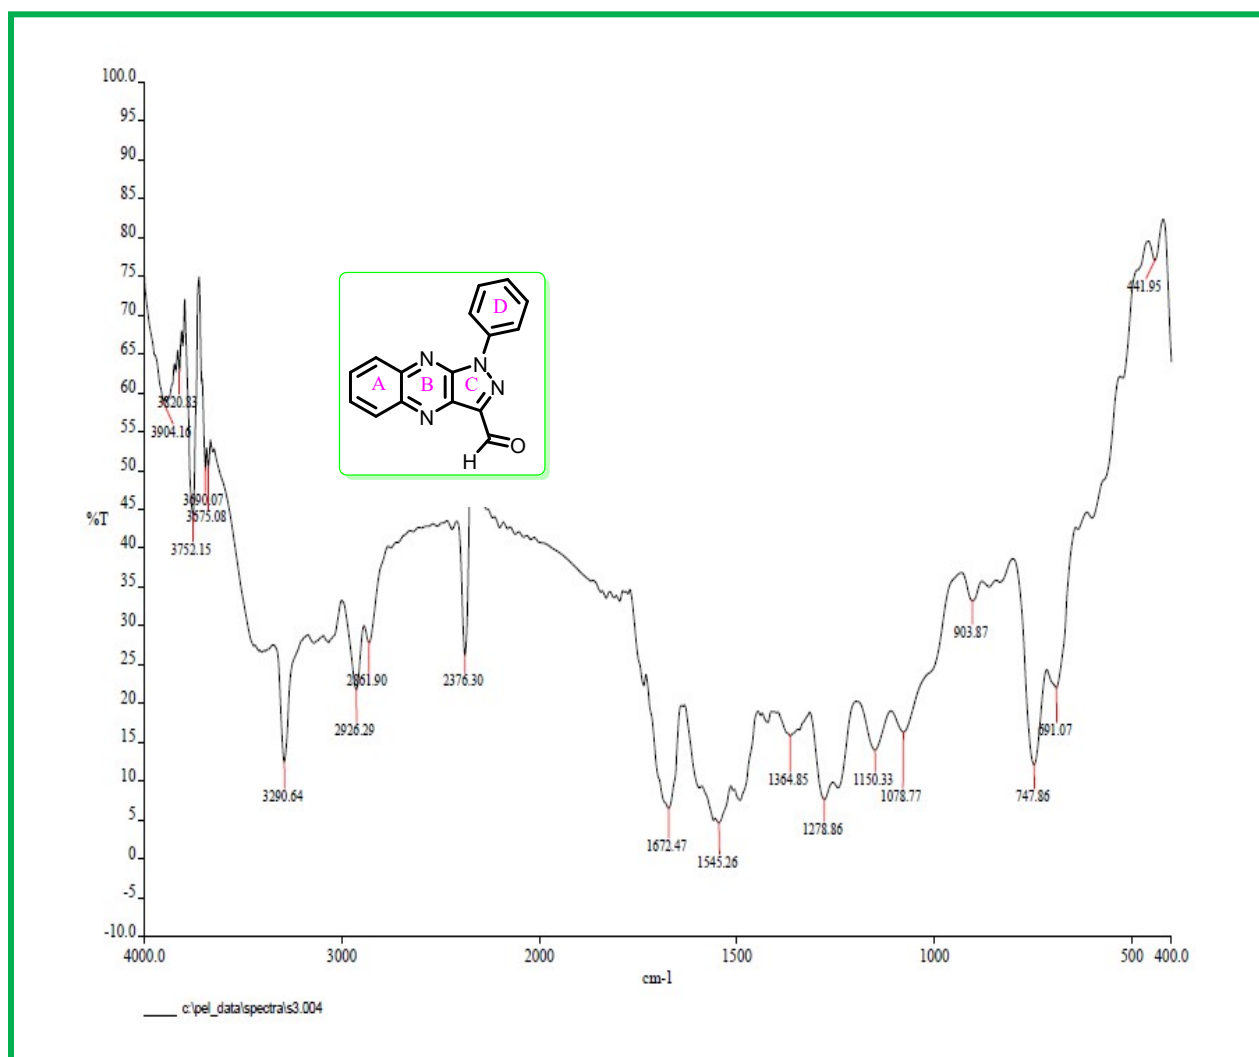

**Fig S13. (FT-IR).** 1-phenyl-1H-pyrazolo[3,4-b] quinoxaline-3-carbaldehyde .

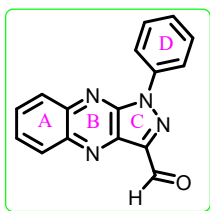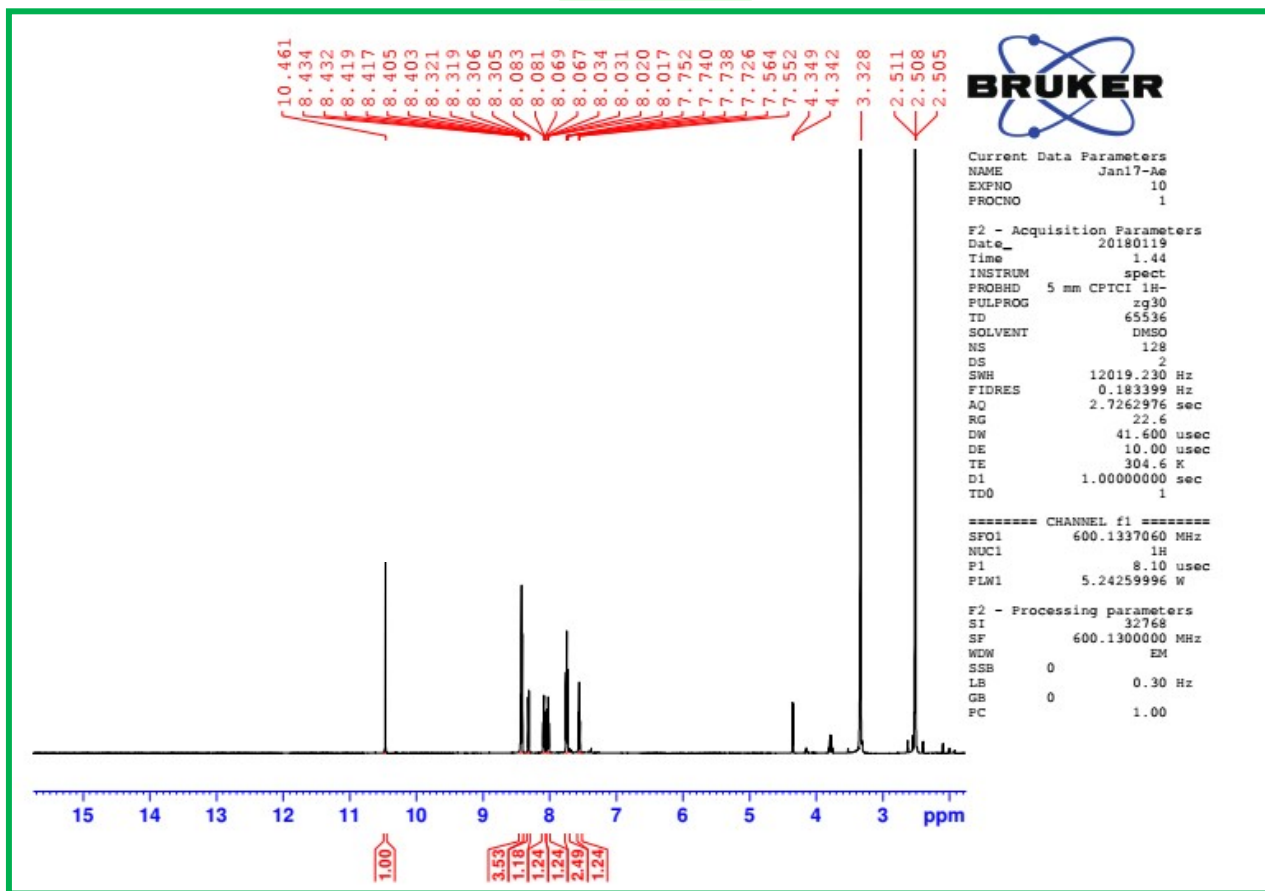

Fig S14. <sup>1</sup>H NMR spectra. 1-phenyl-1*H*-pyrazolo[3,4-*b*] quinoxaline-3-carbaldehyde .

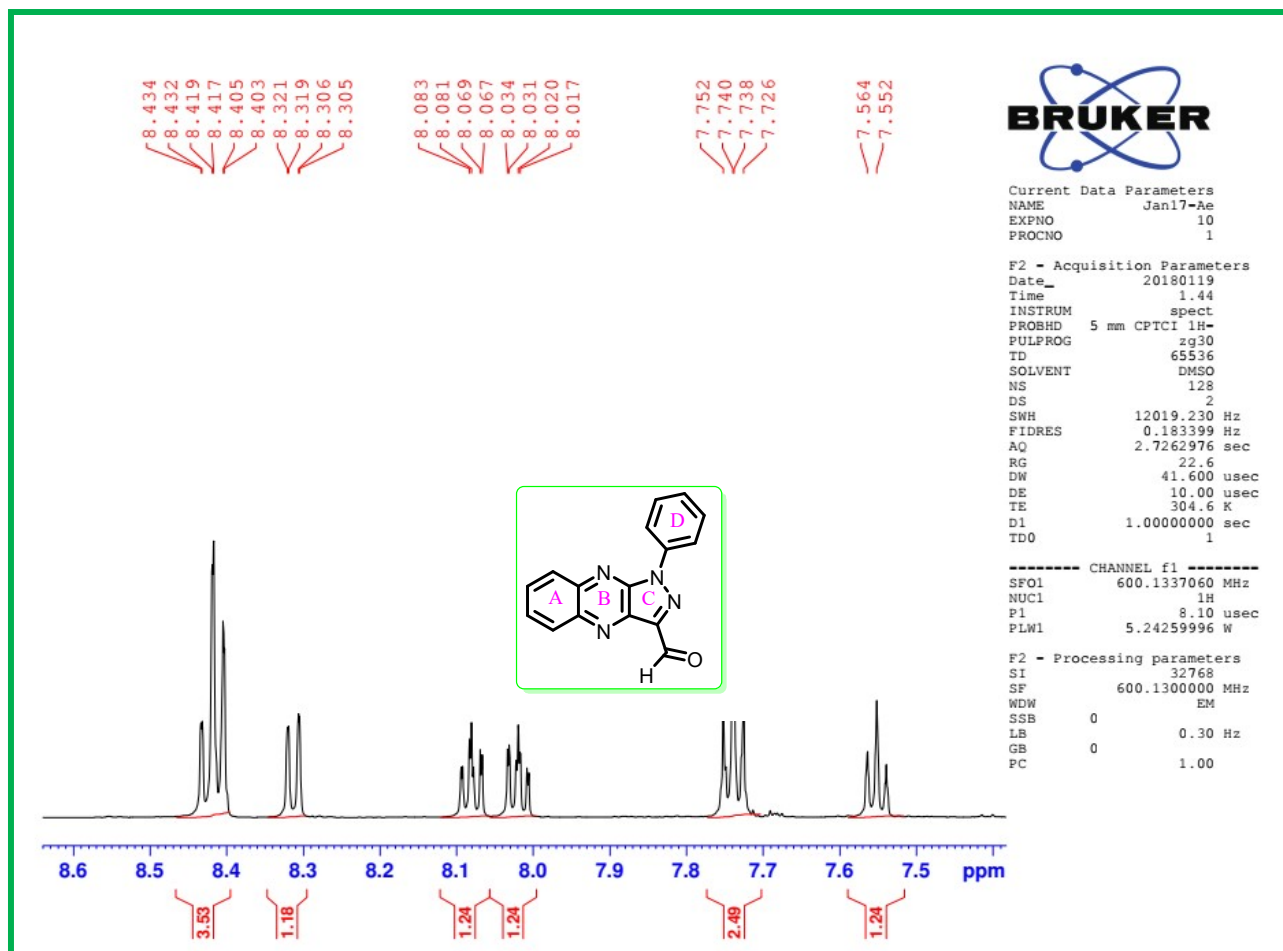

Fig S15. <sup>1</sup>H NMR expand spectra. 1-phenyl-1H-pyrazolo[3,4-b] quinoxaline-3-carbaldehyde .



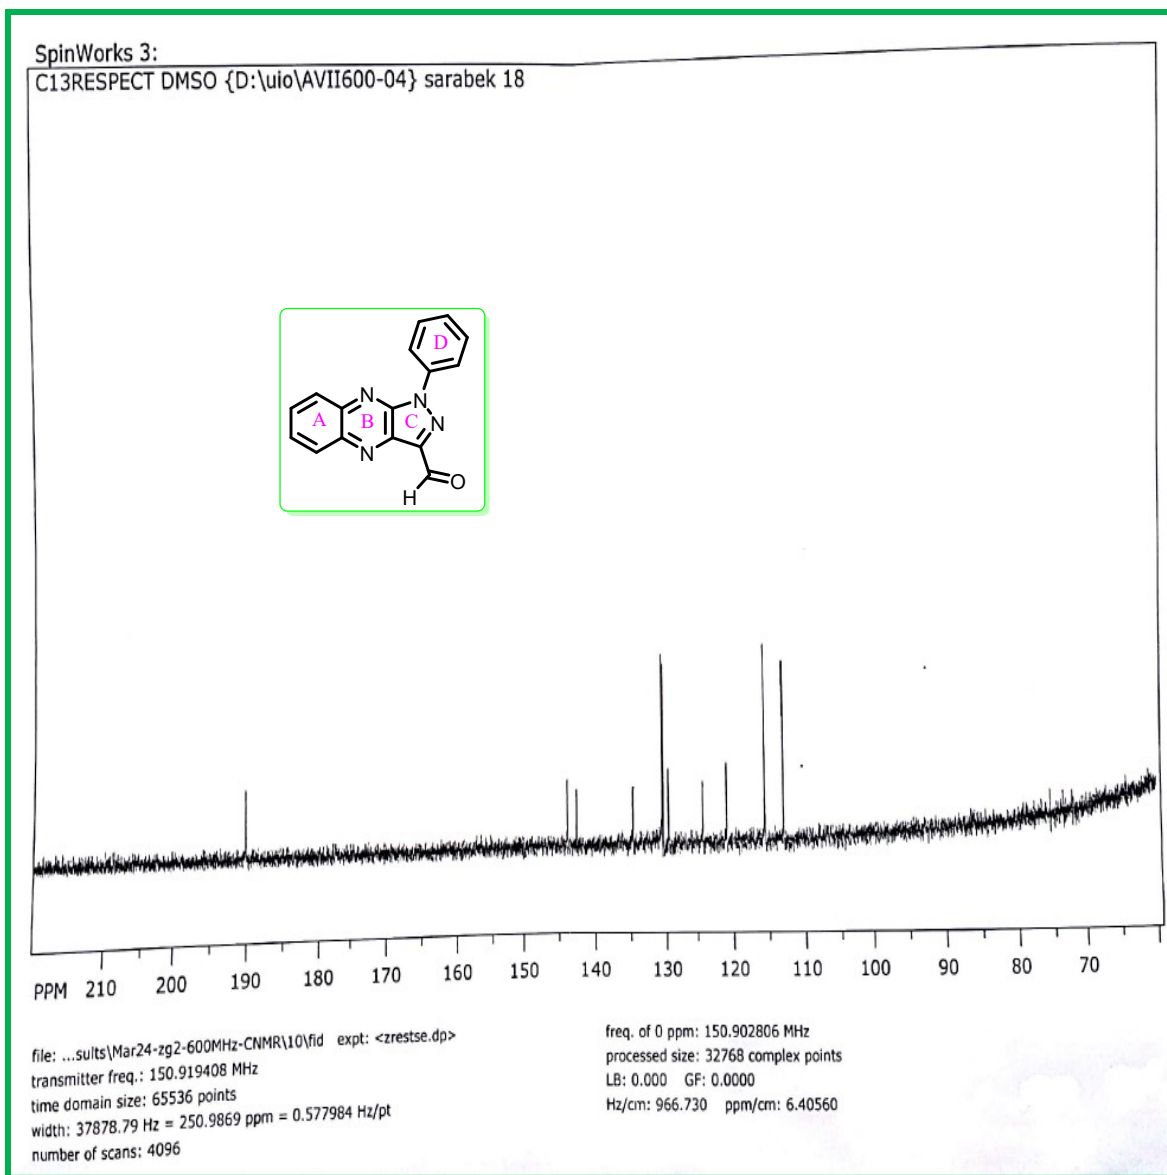

**Fig S16.**  $^{13}\text{C}$ NMR expand spectra. 61-phenyl-1*H*-pyrazolo[3,4-*b*] quinoxaline-3-carbaldehyde

Library Searched : F:\Database\W9N1.L

Quality : 99

ID : Hydrazine, (2,4-dinitrophenyl) && (2,4-Dinitrophenyl)hydrazine

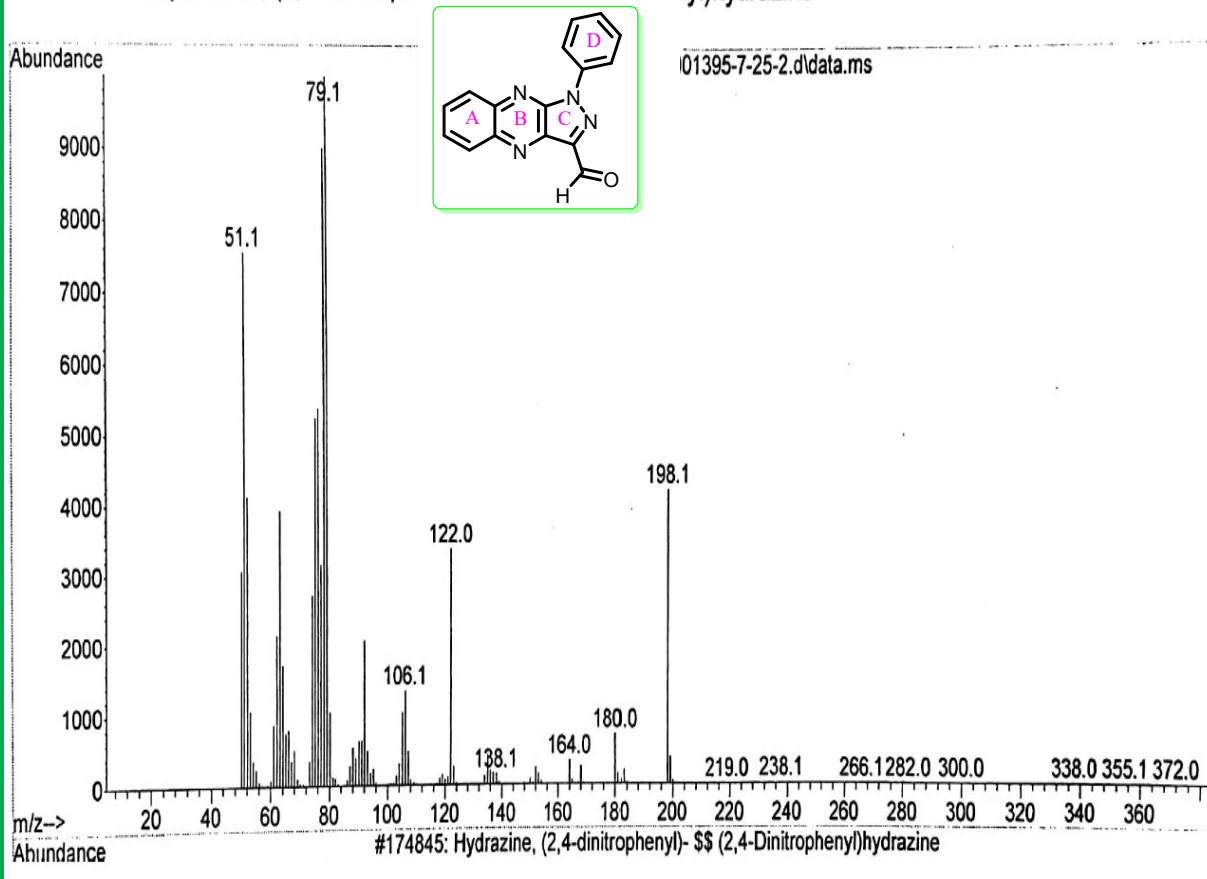

Fig S17. Mass Spectra. 1-phenyl-1H-pyrazolo[3,4-b] quinoxaline-3-carbaldehyde

**3-(2-(4-Bromophenyl)-2-oxoethyl) imidazolidine-2,4-dione:** IR (KBr):  $\nu_{\max}$  = 3400 (NH), 2950 (CH aliphatic), 1740-1690 (3 C=O), 1560-1463 (CH aromatic), 667 (C-Br)  $\text{cm}^{-1}$ ;  $^1\text{H}$  NMR (400 MHz, DMSO):  $\delta$ 4.93 (s, 1H, NH), 5.20 (s, 2H,  $\text{CH}_2$ ), 7.77-7.80 (m, 3H, Ar-H), 7.89-7.94 (m, 3H, Ar-H) ppm.

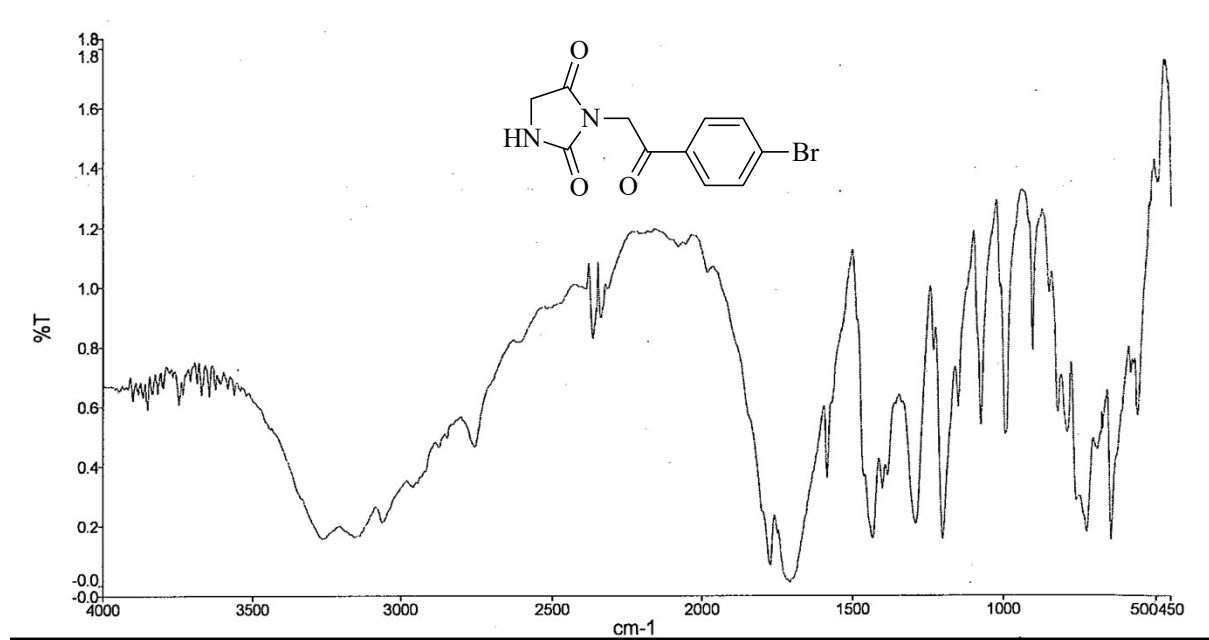

**Fig S18. (FT-IR).** 3-(2-(4-bromophenyl)-2-oxoethyl) imidazolidine-2,4-dione

**(Z)-5-(Quinoxalin-2-ylmethylene) imidazolidine-2,4-dione:** IR (KBr):  $\nu_{\max}$  = 3500-3100 (NH, br), 2920 (CH aliphatic), 1735, 1694 (2 C=O), 1690-1475 (CH aromatic&olefinic, C=N), 1275 (C-N) cm<sup>-1</sup>; <sup>1</sup>H NMR (400 MHz, DMSO):  $\delta$ 4.94 (s, 1H, NH), 7.72 (s, 1H, CH), 7.79 (d, 2H,  $J$  = 8.4 Hz, Ar-H), 7.98 (d, 2H,  $J$  = 8.4 Hz, Ar-H), 8.25 (s, 1H, NCH), 10.62 (s, 1H, NH) ppm.

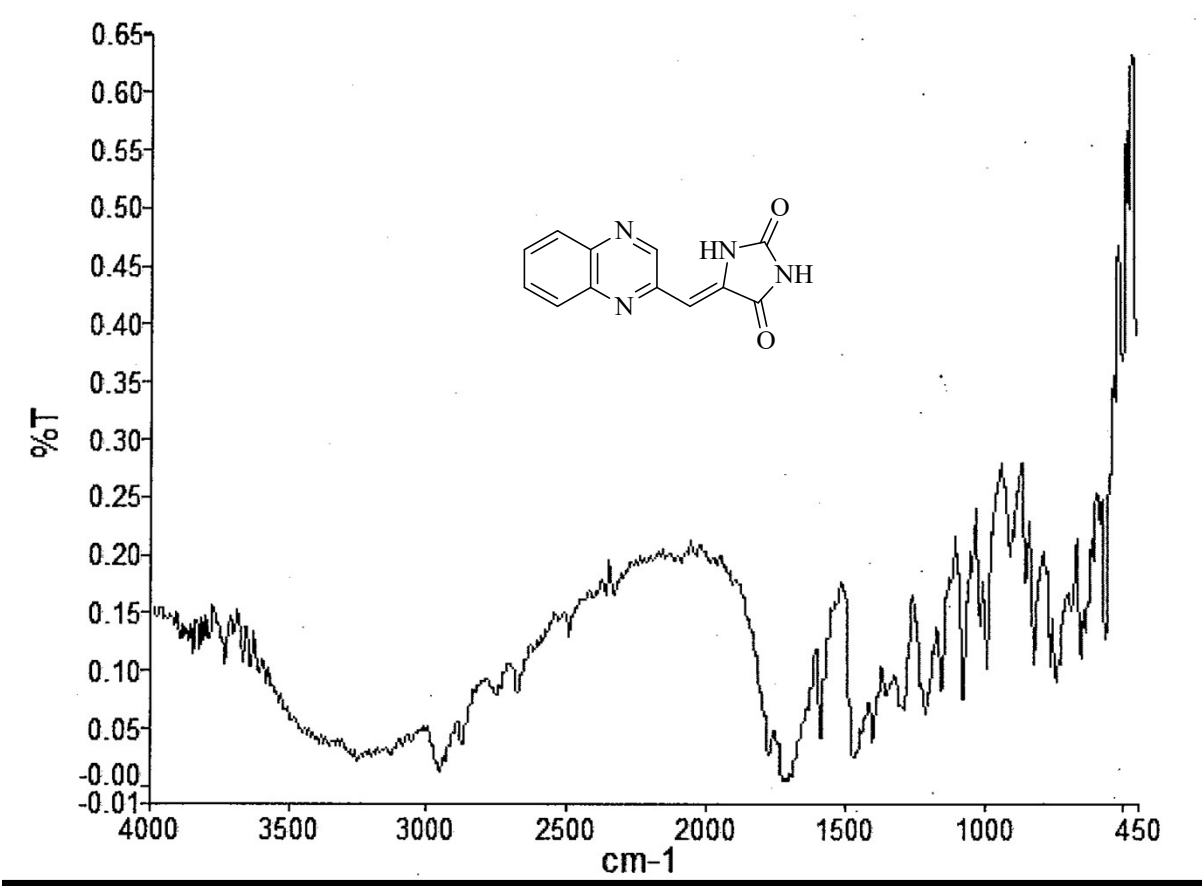

Fig S19. (FT-IR). (Z)-5-(Quinoxalin-2-ylmethylene)imidazolidine-2,4-dione.

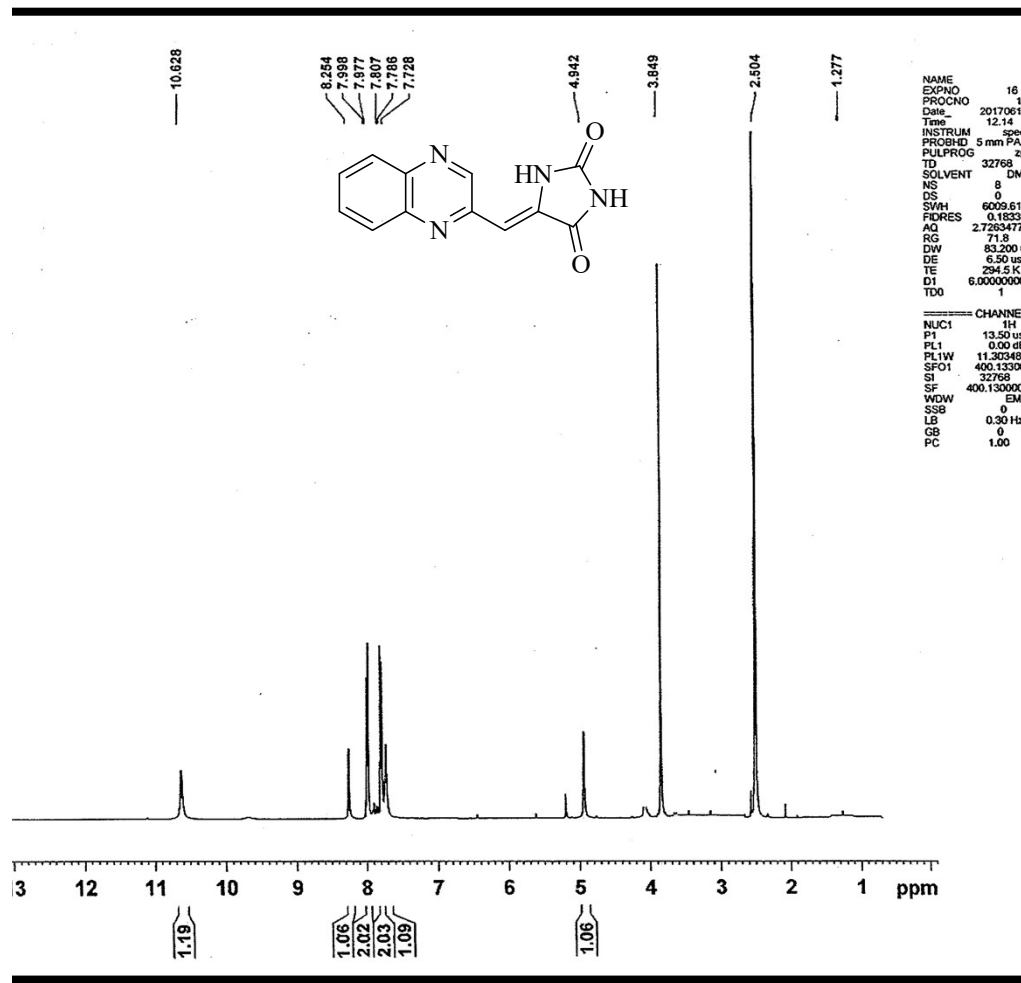

Fig S20. <sup>1</sup>H NMR expand Spectra. (Z)-5-(Quinoxalin-2-ylmethylene) imidazolidine-2,4-dione

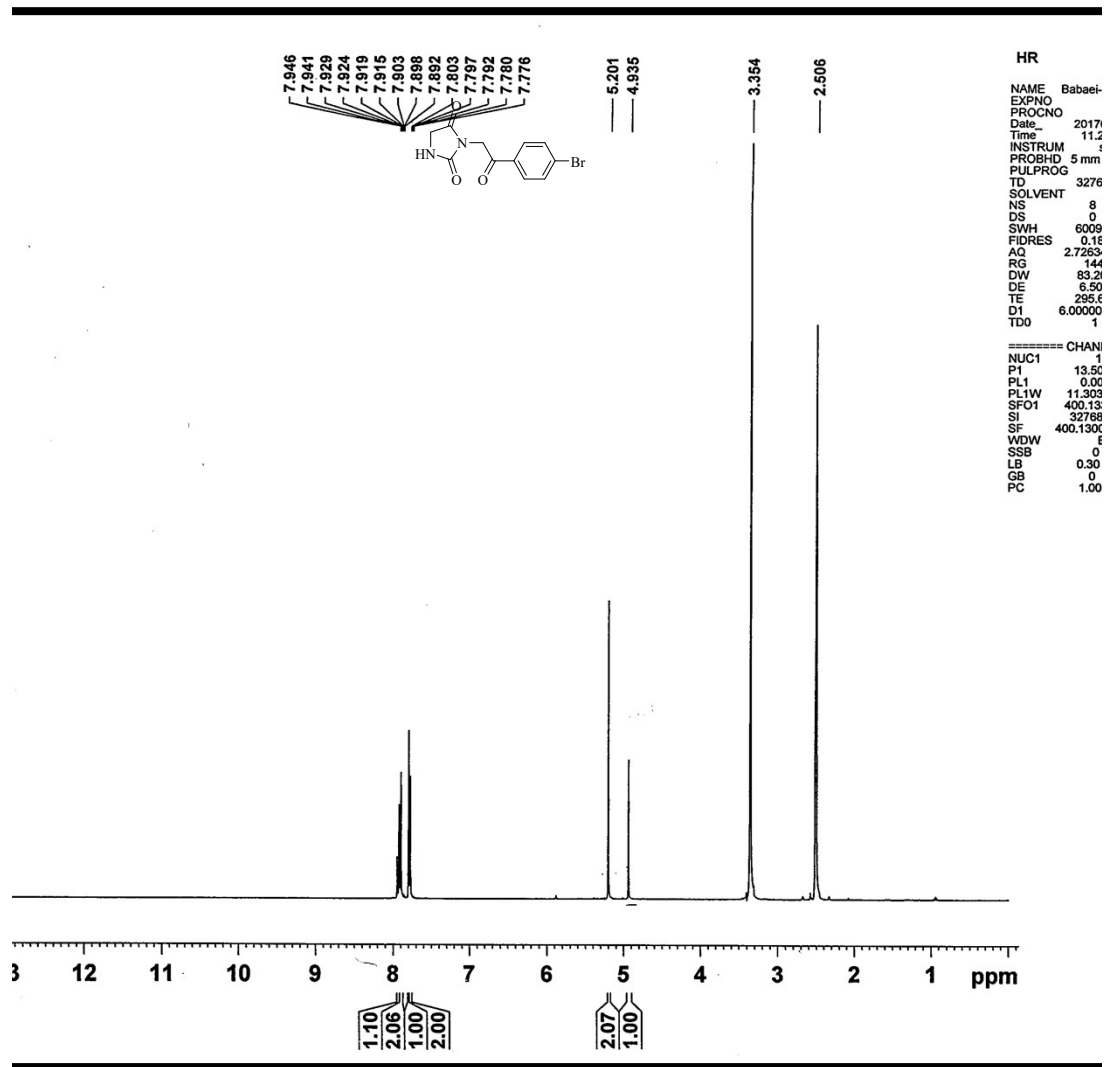

Fig S21. <sup>1</sup>H NMR Spectra. 3-(2-(4-bromophenyl)-2-oxoethyl)imidazolidine-2,4-dione

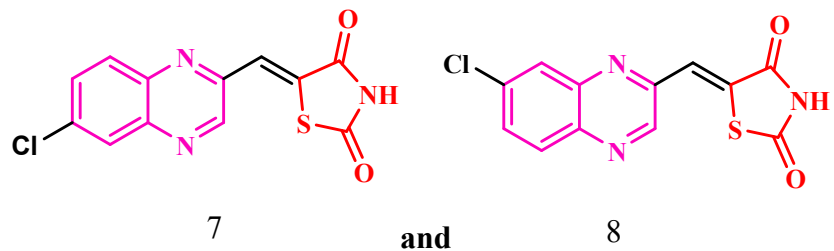

IR (KBr): 3448 (NH), 3100 (C-H<sub>vinyl</sub>), 2918 (CH str.), 1701 (C=O), 1640 (C=N), 1244 (C=C) cm<sup>-1</sup>.  
<sup>1</sup>H NMR (400 MHz, DMSO-d<sub>6</sub>) δ (ppm): 8.45 (d, 1H, J = 2 Hz, 8-H Quinoxaline (Compound 8)), 8.17 (d, 1H, J = 2 Hz, 5-H Quinoxaline (Compound 7)), 8.30 (d, 1H, J = 8.8 Hz, 5-H Quinoxaline (Compound 8)), 8.12 (d, 1H, J = 8.8 Hz, 8-H Quinoxaline (Compound 7)), 7.99 (dd, 1H, J = 8.8 Hz and J = 2.4 Hz, 6 -H Quinoxaline (Compound 8)), 7.88 (dd, 1H, J = 8.8 Hz and J = 2.4 Hz, 7 -H Quinoxaline (Compound 7)), 7.63 (s, 1H, NH), 7.23 (s, 1H, H<sub>vinyl</sub>), 9.40 (s, 1H, 3-H Quinoxaline); <sup>13</sup>C NMR (100 MHz, DMSO-d<sub>6</sub>) δ (ppm): 191 (C<sub>C=O</sub>), 172 (C<sub>C=O</sub>), 166 (C<sub>C=O</sub>), 152 (C-2 Quinoxaline), 147 (C-3 Quinoxaline), 147 (C<sub>C-Cl</sub>) 145 (C-4a Quinoxaline), 142 (C-8a Quinoxaline), 139(C-6 Quinoxaline), 134 (C-8 Quinoxaline), 132 (C-5 Quinoxaline), 130 (C-4 phenyl), 130 (C-1 phenyl), 130 (C-2 and C-6 phenyl), 129 (C-3 and C-5 phenyl), 127 and 128 (C=C vinyl), 47 (CH<sub>2</sub>), 34 (CH<sub>3</sub>).

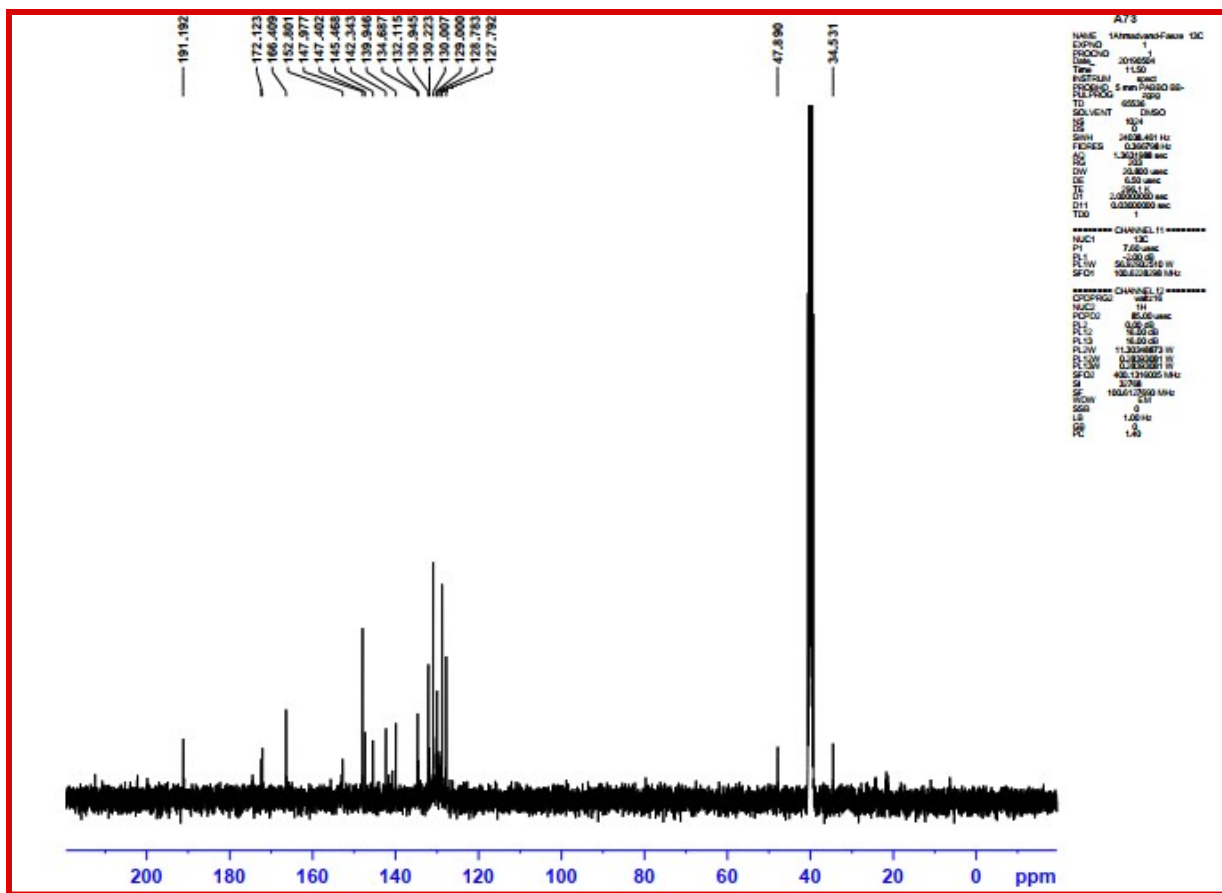

Fig S22. <sup>13</sup>CNMR Spectra. (Z)-5-((6-chloroquinoxalin-2-yl)methylene)thiazolidine-2,4-dione



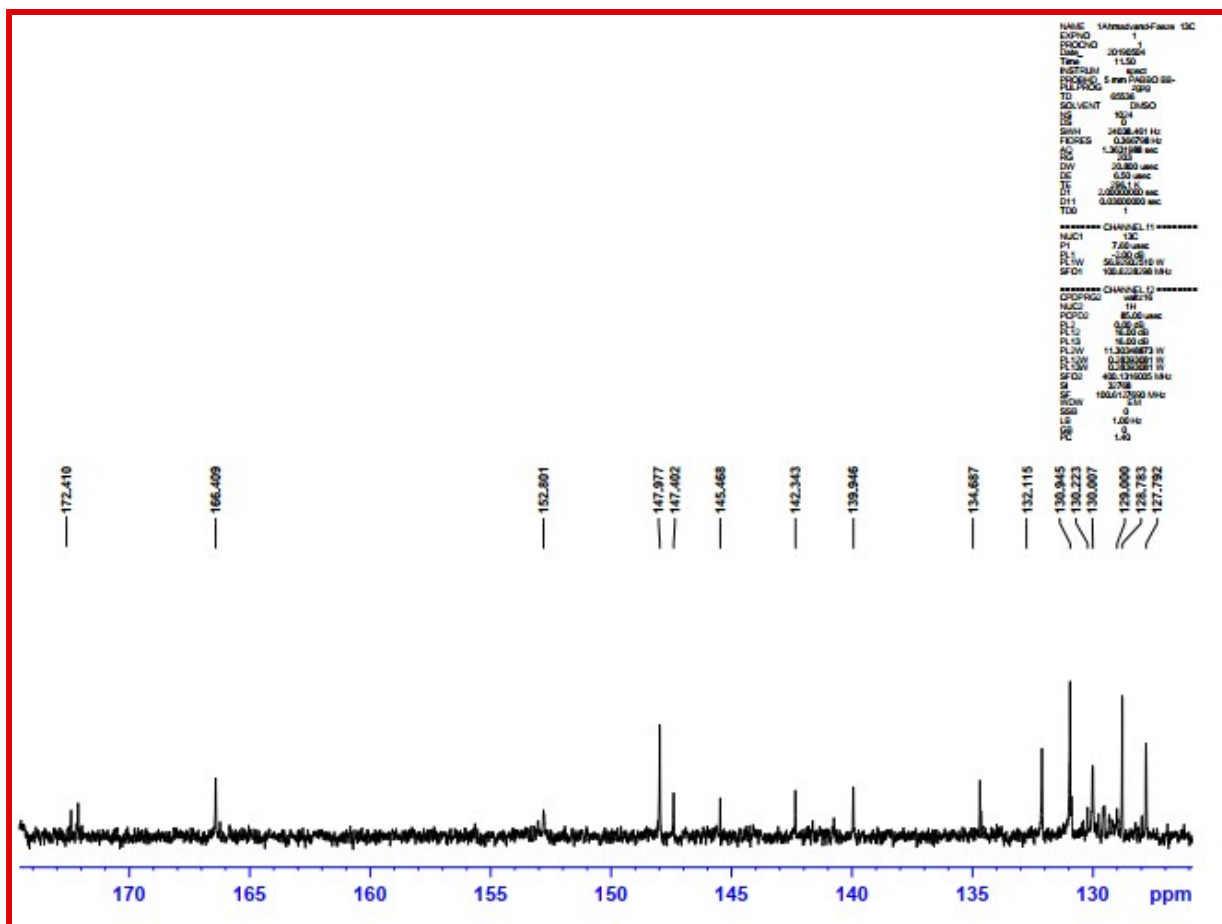

Fig S23. <sup>13</sup>CNMR Spectra. (Z)-5-((6-chloroquinoxalin-2-yl)methylene)thiazolidine-2,4-dione

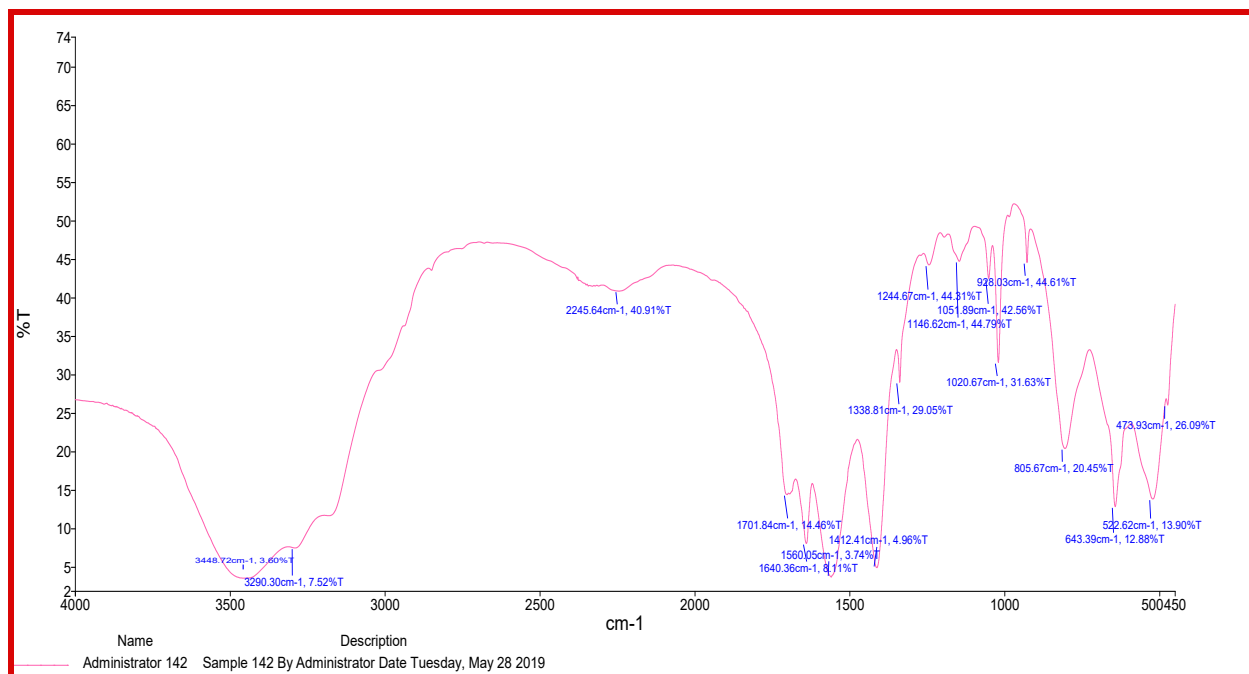

**Fig S24. FTIR Spectra.** (Z)-5-((6-chloroquinoxalin-2-yl) methylene) thiazolidine-2,4-dione

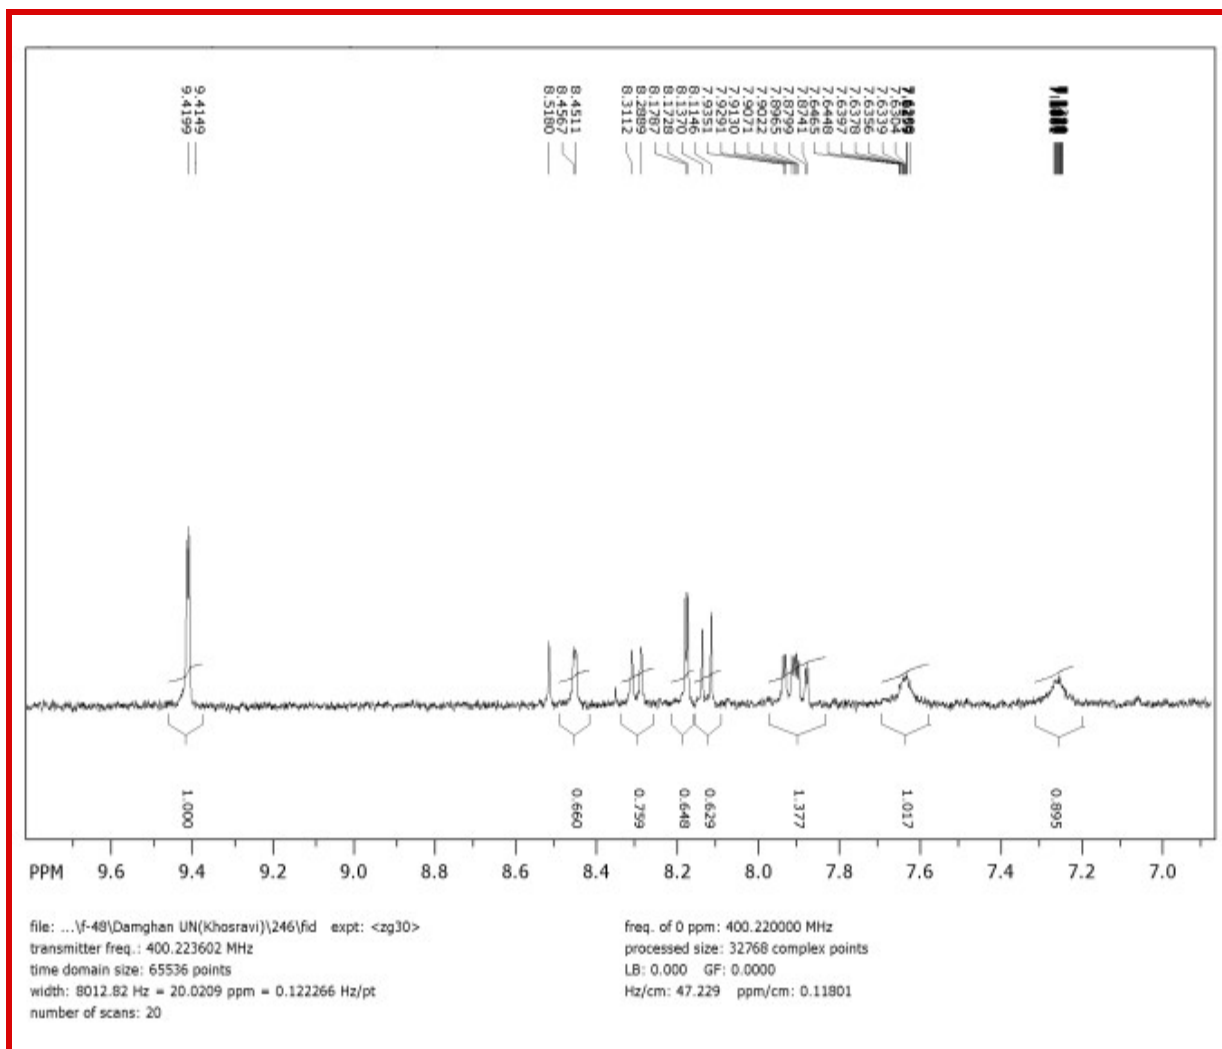

**Fig S25.** <sup>1</sup>H NMR expand Spectra. (Z)-5-((6-chloroquinoxalin-2-yl)methylene)thiazolidine-2,4-dione

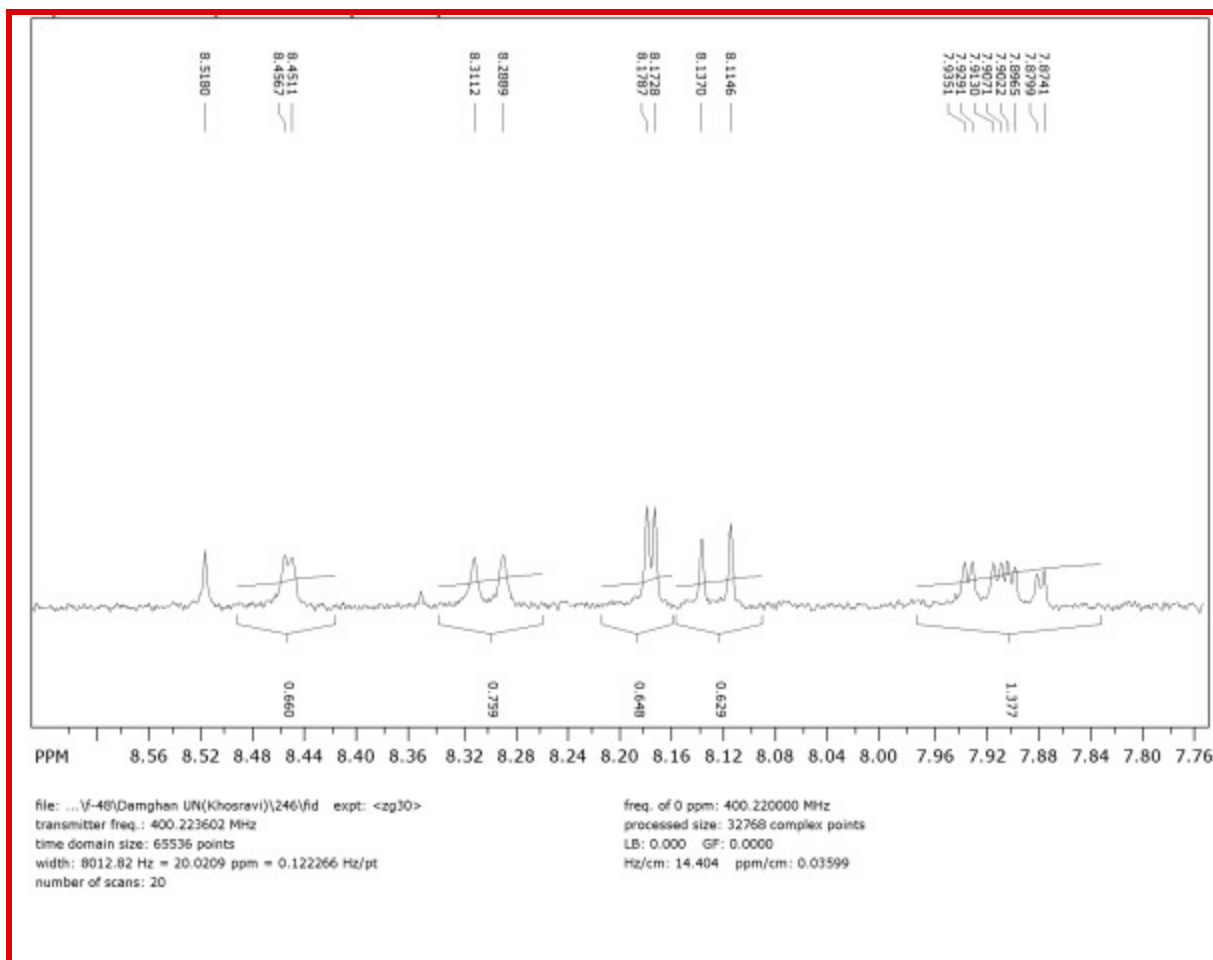

Fig S26. <sup>1</sup>H NMR expand Spectra. (Z)-5-((6-chloroquinoxalin-2-yl)methylene)thiazolidine-2,4-dione

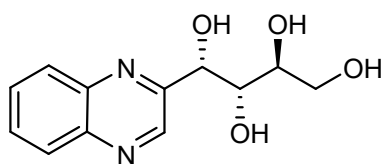

IR (KBr):  $\nu_{\max}$  = 3451-3243 (4 OH, br), 2910 (CH aliphatic), 1663-1562 (CH aromatic, C=N), 1370 (C-N), 1125, 1108, 1044 (3 C-OH)  $\text{cm}^{-1}$ .

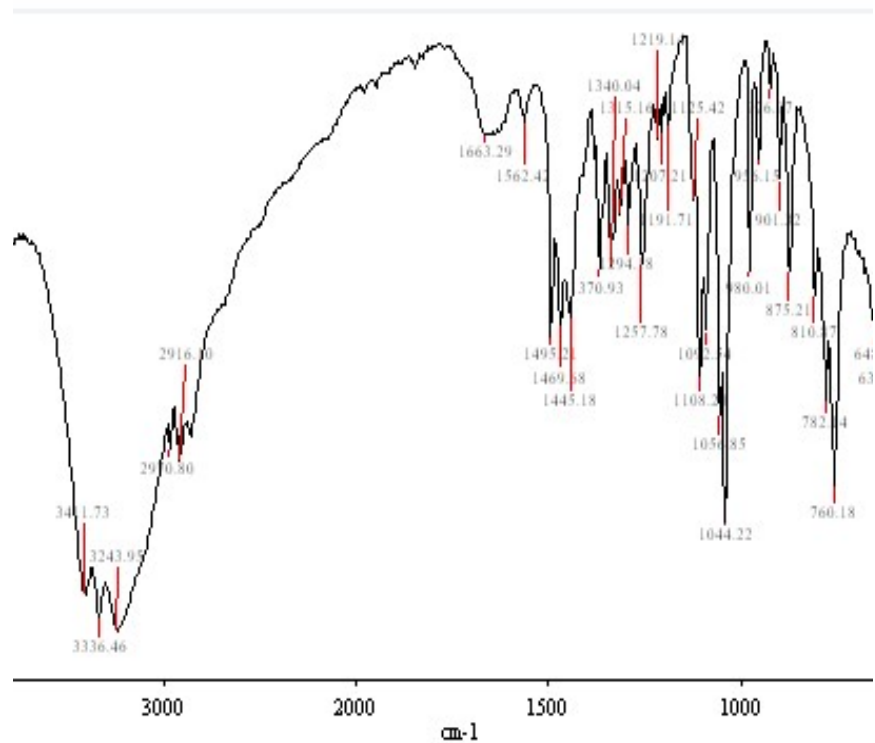

**Fig S27. (FT-IR).** (1S,2R,3S)-1-(quinoxalin-2-yl)butane-1,2,3,4-tetraol

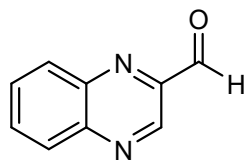

IR (KBr):  $\nu_{\max}$  = 2862 (CH aldehyde), 1699 (C=O), 1640-1609 (CH aromatic&olefinic, C=N), 1359-1329 (2 C-N)  $\text{cm}^{-1}$ ;  $^1\text{H}$  NMR (400 MHz,  $\text{CDCl}_3$ ):  $\delta$  7.80-7.98 (m, 2H, Ar-H), 8.22-8.29 (m, 2H, ArH), 9.49 (s, 1H,  $\text{CH}_{\text{olefinic}}$ ), 10.33 (s, 1H, CHO) ppm. MS ( $m/z$ , %): 158 ( $\text{M}^+$ , 100).

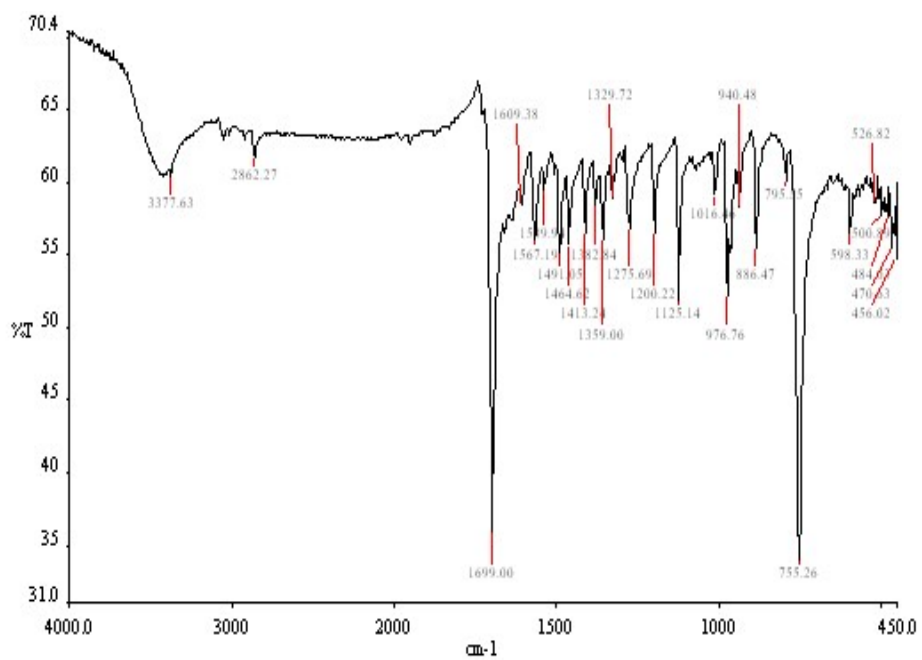

**Fig S28. (FT-IR).** quinoxaline-2-carbaldehyde

yellow crystal (94%); mp: 168-169 °C; IR (KBr,  $\nu_{\max}$ ,  $\text{cm}^{-1}$ ): 3468, 3135, 3039, 2703, 1731, 1643, 1395, 1347, 1205, 1174, 897, 876, 788, 787, 662, 542  $\text{cm}^{-1}$ ;  $^1\text{H-NMR}$  (400 MHz,  $\text{CDCl}_3$ ):  $\delta$  (ppm) 4.26 (s, 2H,  $\text{CH}_2$ ), 12.88 (bs, 1H, NH);  $^{13}\text{C-NMR}$  (100 MHz,  $\text{CDCl}_3$ ); 40.6, 175.5, 201.

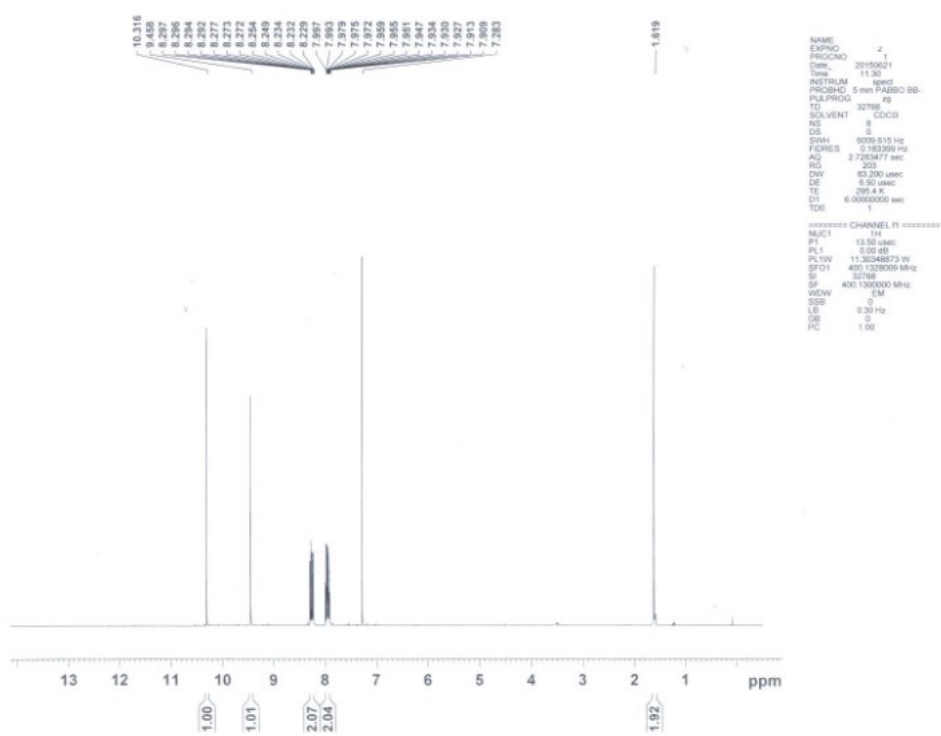

Fig S29. <sup>1</sup>H NMR expand spectra. quinoxaline-2-carbaldehyde

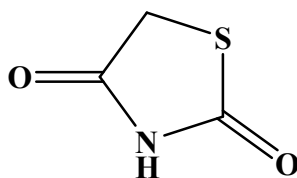

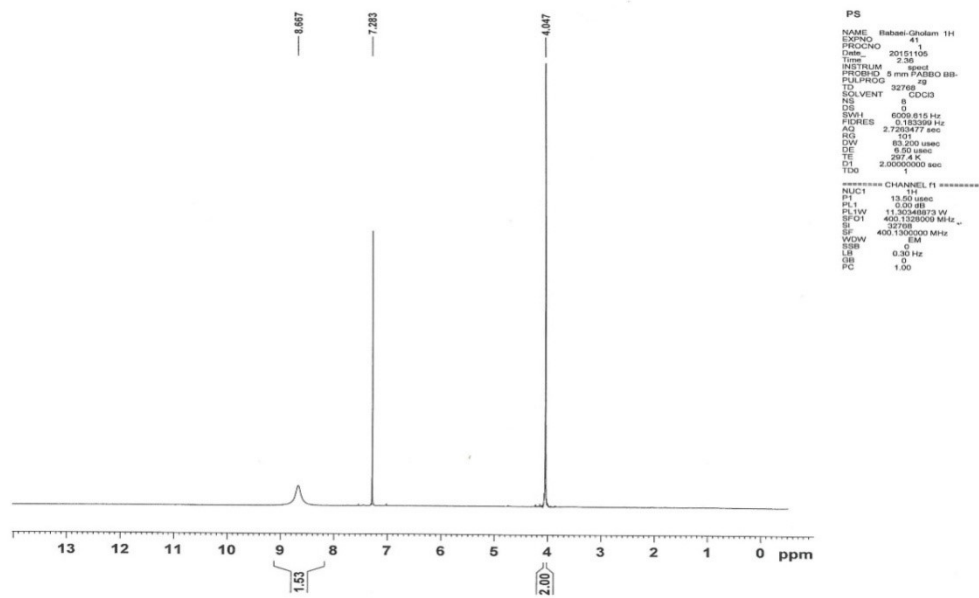

Fig S30. <sup>1</sup>H NMR spectra. Thiazolidine-2,4-dione



## Section 2: The analytical and spectroscopic data for the unknown final products.

**(Z)-3-phenyl-5-(quinoxalin-2-ylmethylene)-2-thioxothiazolidin-4-one(L8a)**; IR (KBr,  $\text{cm}^{-1}$ ):  $\nu = 2918.12$  (C-H aromatic), 1660 (C=O), 1596 (C=N).  $^1\text{H NMR}$  (400 MHz,  $\text{DMSO } d_6$ )  $\delta$  (ppm): 9.42 (s, 1H, H-3 Quinoxaline), 8.14 (s, 1H, HC=C), 8.28- 8.31 (m, 1H, H-8 Quinoxaline), 8.15-8.17 (m, 1H, H-5 Quinoxaline), 8.03 (s, 1H, HC=C), 7.94- 8.00 (m, 2H, H-6 and H-7 Quinoxaline), 4.12 (q, 2H,  $J=7.2$  Hz,  $\text{CH}_2$ ), 1.23 (t, 3H,  $J=7.2$  Hz, CH).

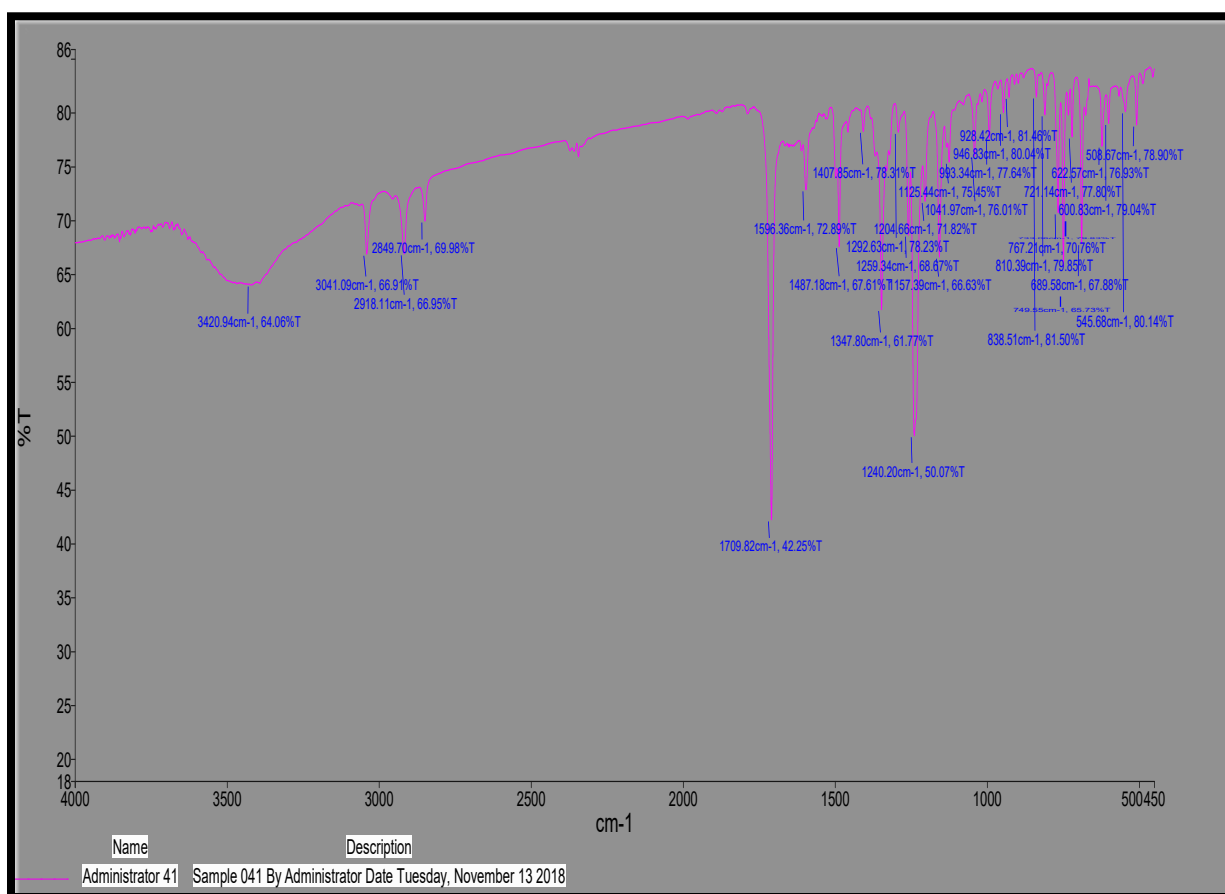

Fig S31. (FT-IR). (Z)-3-phenyl-5-(quinoxalin-2-ylmethylene)-2-thioxothiazolidin-4-one (L8a)

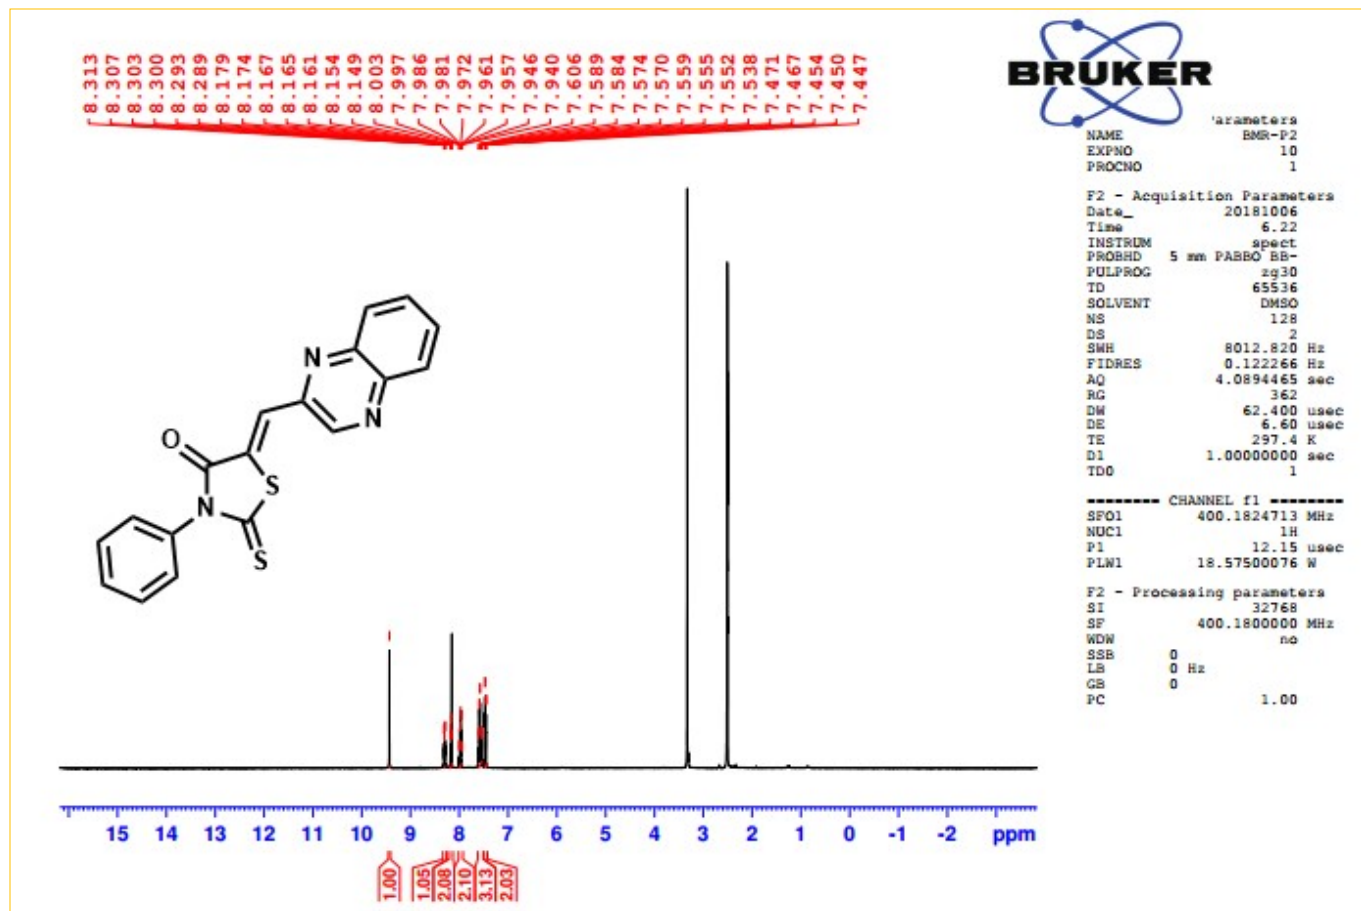

Fig S32. <sup>1</sup>H NMR Spectra. (Z)-3-phenyl-5-(quinoxalin-2-ylmethylene)-2-thioxothiazolidin-4-one (L8a)

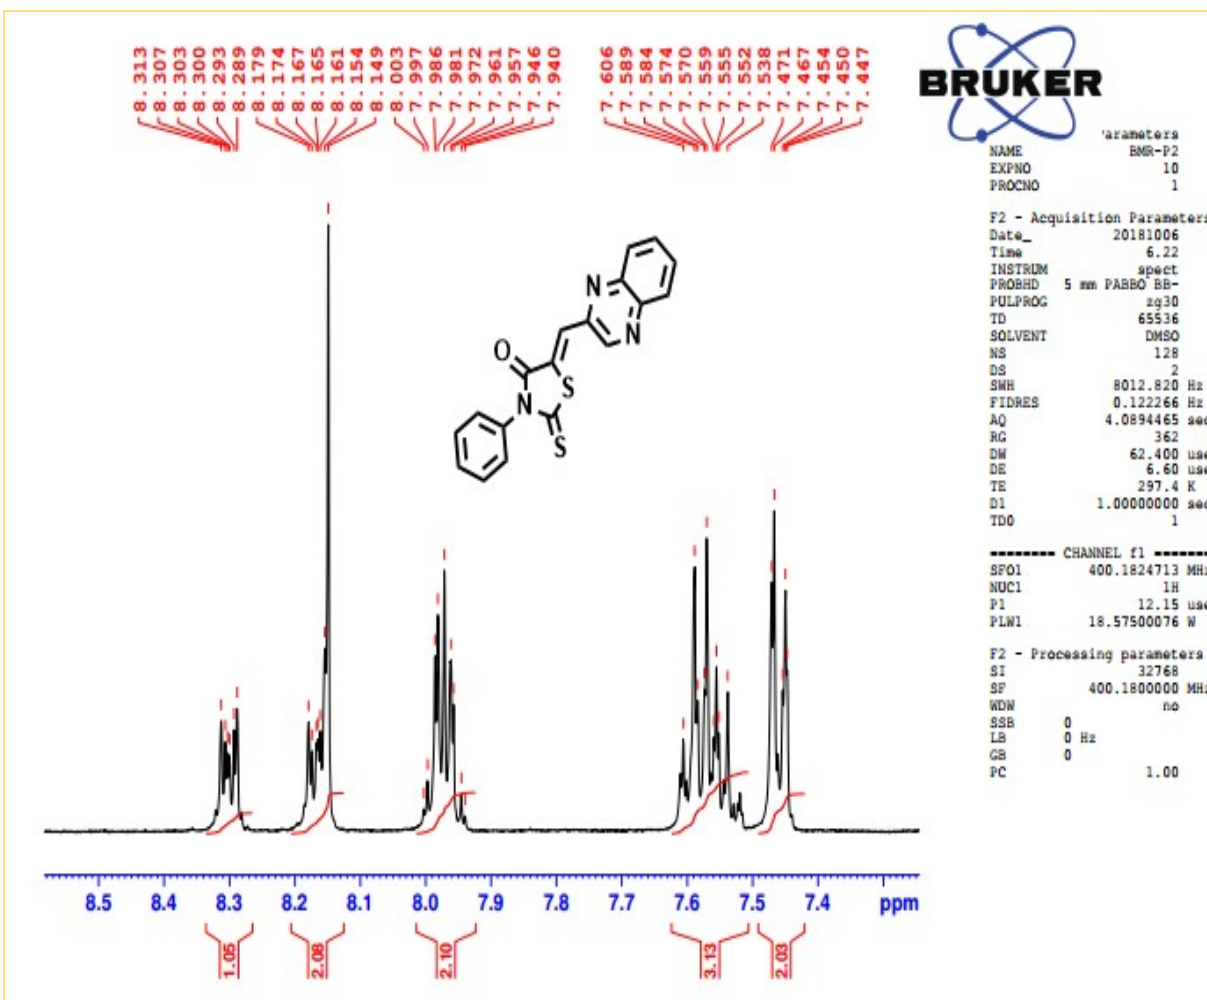

Fig S33. <sup>1</sup>H NMR expand spectra. (Z)-3-phenyl-5-(quinoxalin-2-ylmethylene)-2-thioxothiazolidin-4-one (L8a)

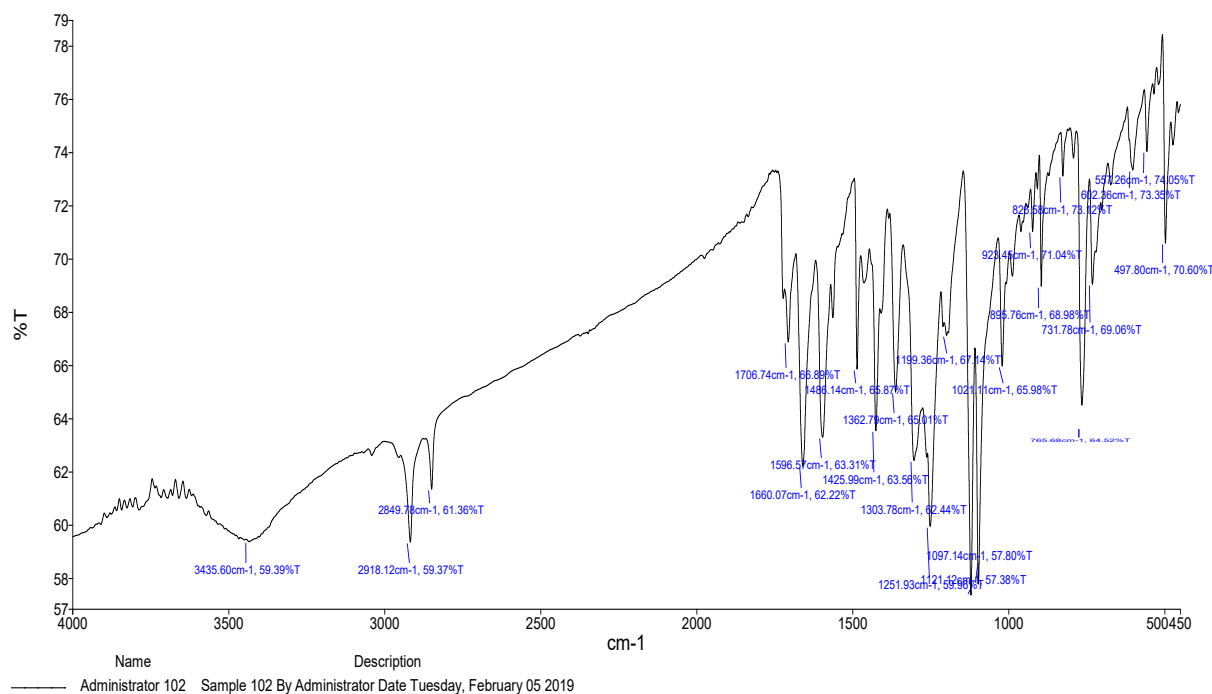

**Fig S34. (FT-IR). (Z)-3-methyl-5-(quinoxalin-2-ylmethylene)-2-thioxothiazolidin-4-one (L6a)**

**(Z)-3-methyl-5-(quinoxalin-2-ylmethylene)-2-thioxothiazolidin-4-one(L6a);** IR (KBr, cm), 2917.91(C–H aromatic), 1239(C=C). 1709(C=O), 1603 (C=N), HNMR (400 MHz, DMSO d<sub>6</sub>),<sup>1</sup> HNMR (400 MHz, DMSO d<sub>6</sub>) δ (ppm): 9.41 (s, 1H, H-3 Quinoxaline), 8.22- 8.30 (m, 1H, H-8 Quinoxaline), 8.14-8.21 (m, 1H, H-5 Quinoxaline), 8.13 (s, 1H, HC=C), 7.29 8.00 (m, 2H, H-6 and H-7 Quinoxaline), 3.46 (t, 3H, CH<sub>3</sub>).

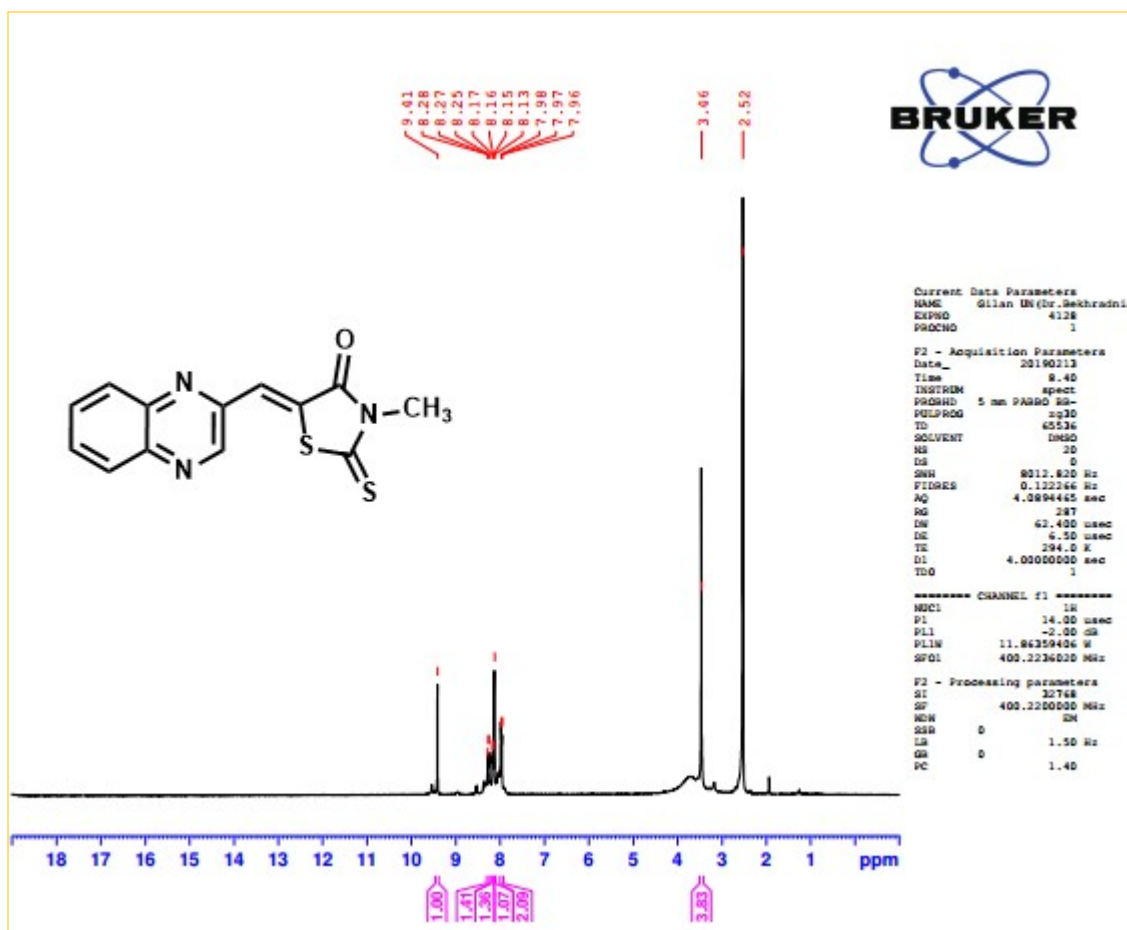

Fig S35. <sup>1</sup>H NMR Spectra. (Z)-3-methyl-5-(quinoxalin-2-ylmethylene)-2-thioxothiazolidin-4-one (L6a)

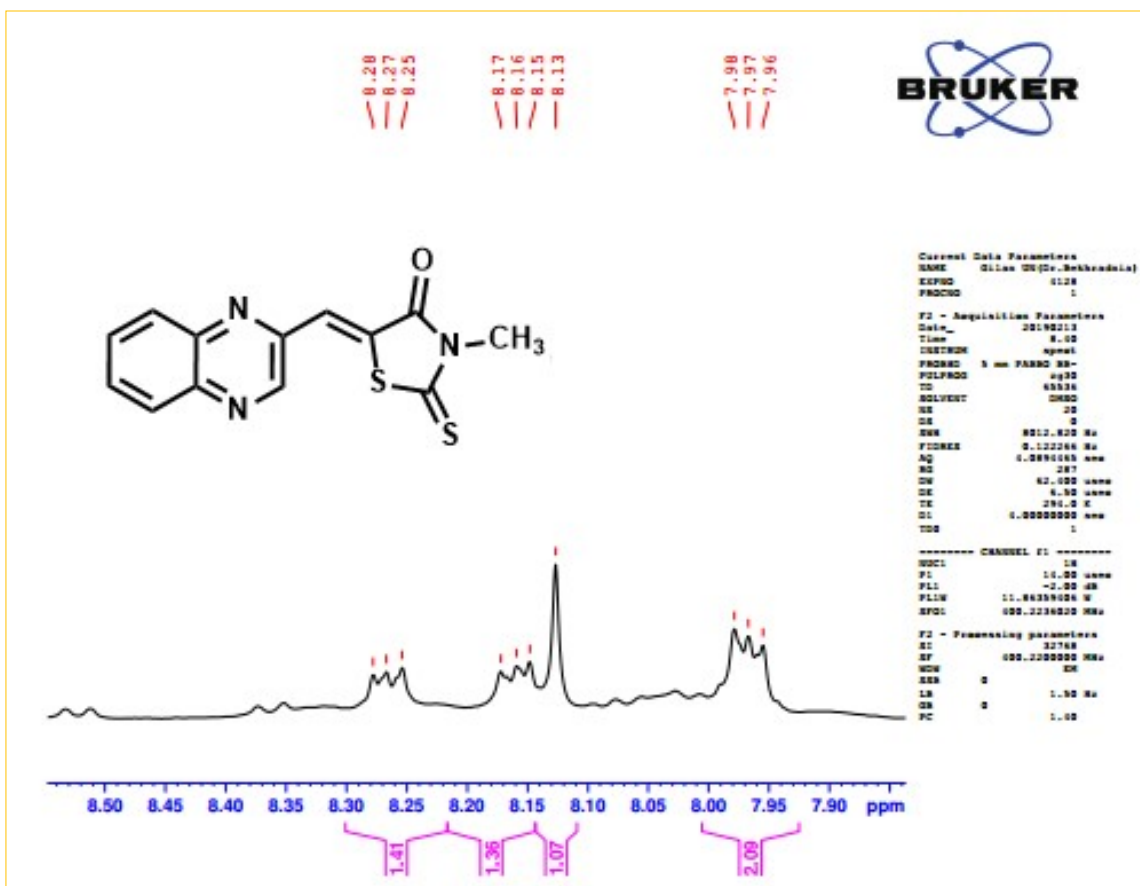

**Fig S36.** <sup>1</sup>HNMR expand spectra. (Z)-3-methyl-5-(quinoxalin-2-ylmethylene)-2-thioxothiazolidin-4-one (L6a)

**(Z)-3-ethyl-5-(quinoxalin-2-ylmethylene)-2-thioxothiazolidin-4-one (L7a):** IR (KBr,  $\text{cm}^{-1}$ ):  $\nu = 2918.12$  (C-H aromatic), 1660 (C=O), 1596 (C=N). <sup>1</sup>HNMR (400 MHz, DMSO  $d_6$ )  $\delta$  (ppm): 9.40 (s, 1H, H-3 Quinoxaline), 8.22- 8.30 (m, 1H, H-8 Quinoxaline), 8.13-8.20 (m, 1H, H-5 Quinoxaline), 8.03 (s, 1H, HC=C), 7.89-43, 8.01 (m, 2H, H-6 and H-7 Quinoxaline), 4.12 (q, 2H,  $J=7.2$  Hz, CH<sub>2</sub>), 1.23 (t, 3H,  $J=7.2$ Hz, CH<sub>3</sub>).

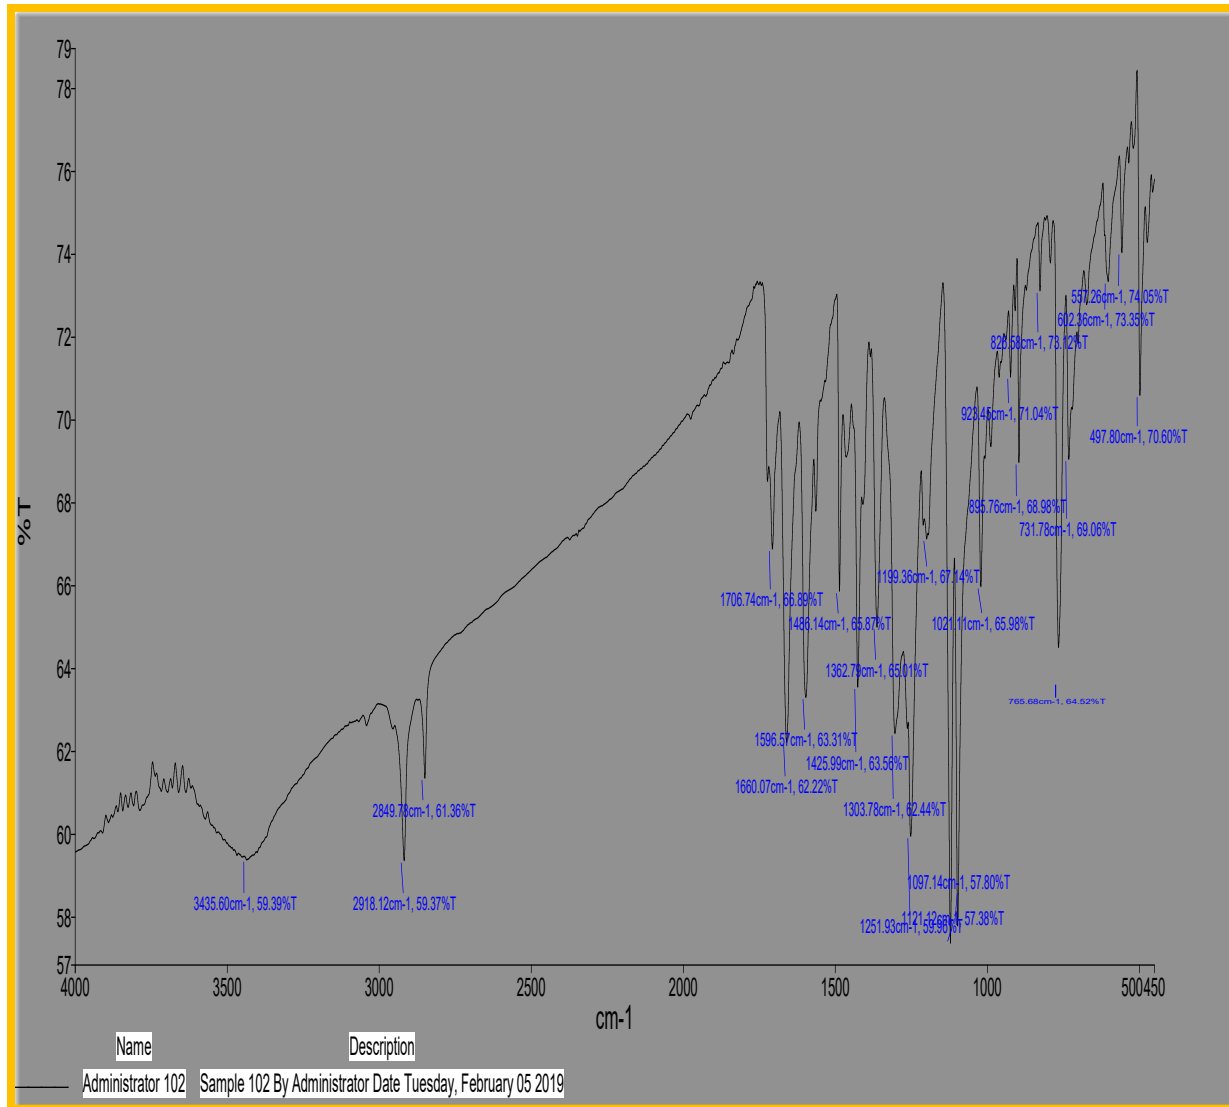

**Fig S37. (FT-IR).** (Z)-3-ethyl-5-(quinoxalin-2-ylmethylene)-2-thioxothiazolidin-4-one (**L7a**)

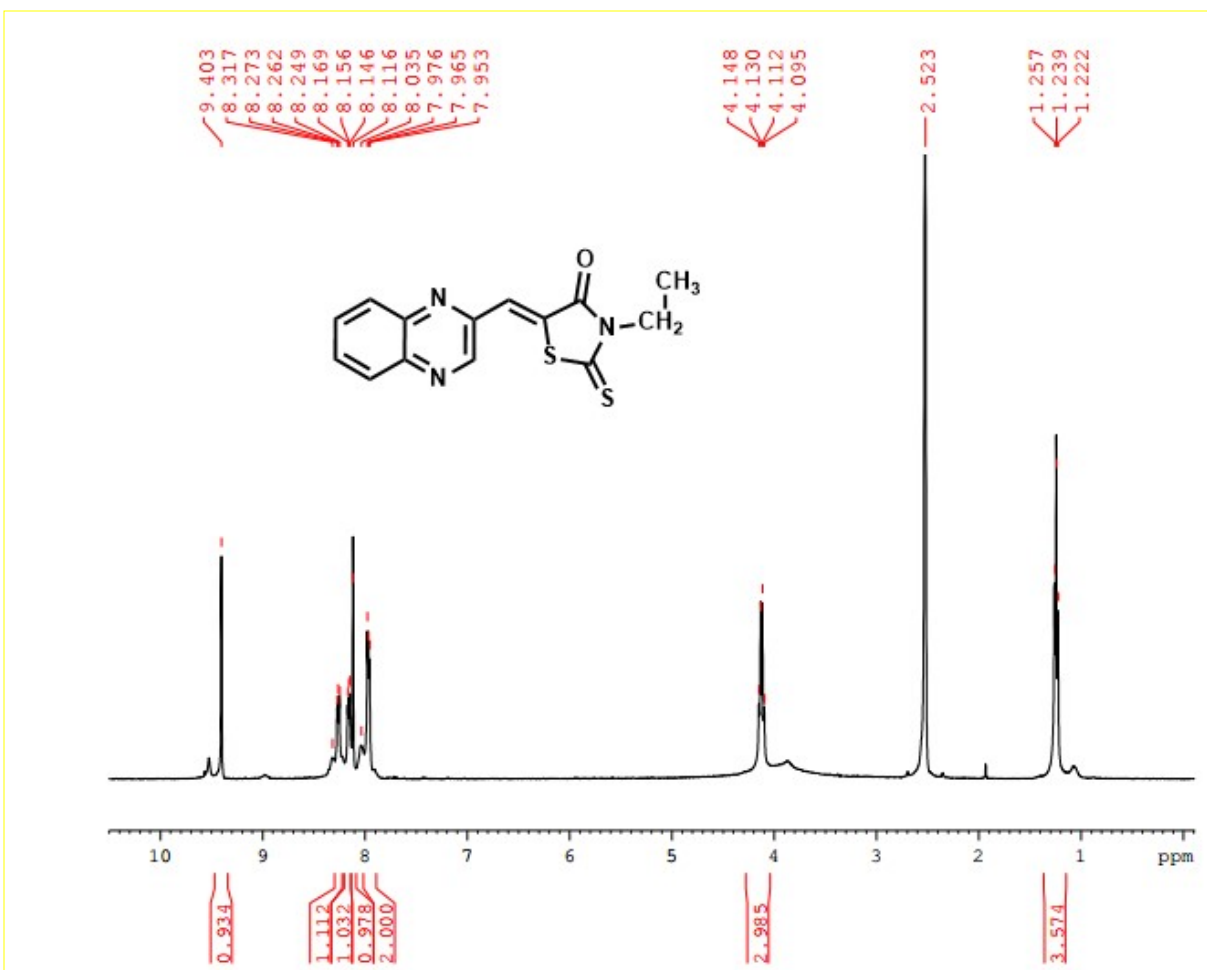

**Fig S38.** <sup>1</sup>H NMR Spectra. (Z)-3-ethyl-5-(quinoxalin-2-ylmethylene)-2-thioxothiazolidin-4-one (L7a)

**(Z)-3-(4-nitrophenyl)-5-(quinoxalin-2-ylmethylene)-2-thioxothiazolidin-4-one(L2b) ;**

IR (KBr, cm<sup>-1</sup>):  $\nu = 2919$  (C-H aromatic), 1680 (C=O), 1597 (C=N)<sup>1</sup>. <sup>1</sup>H NMR (400 MHz, DMSO d<sub>6</sub>)  $\delta$ : 10.57 (s, 1H, H-3 Quinoxaline), 9.6 (s, 1H, HC=C) 8.4-8.2 (m, 2H, H-5 and H-8 Quinoxaline), 8.21 (d, 2H, J=8 Hz, H-2 and H-6 phenyl) 7.83 (d, 2H, J=8 Hz, H-3 and H-5 phenyl), 8.04-8.07 (m, 2H, H-6 and H-7 Quinoxaline).



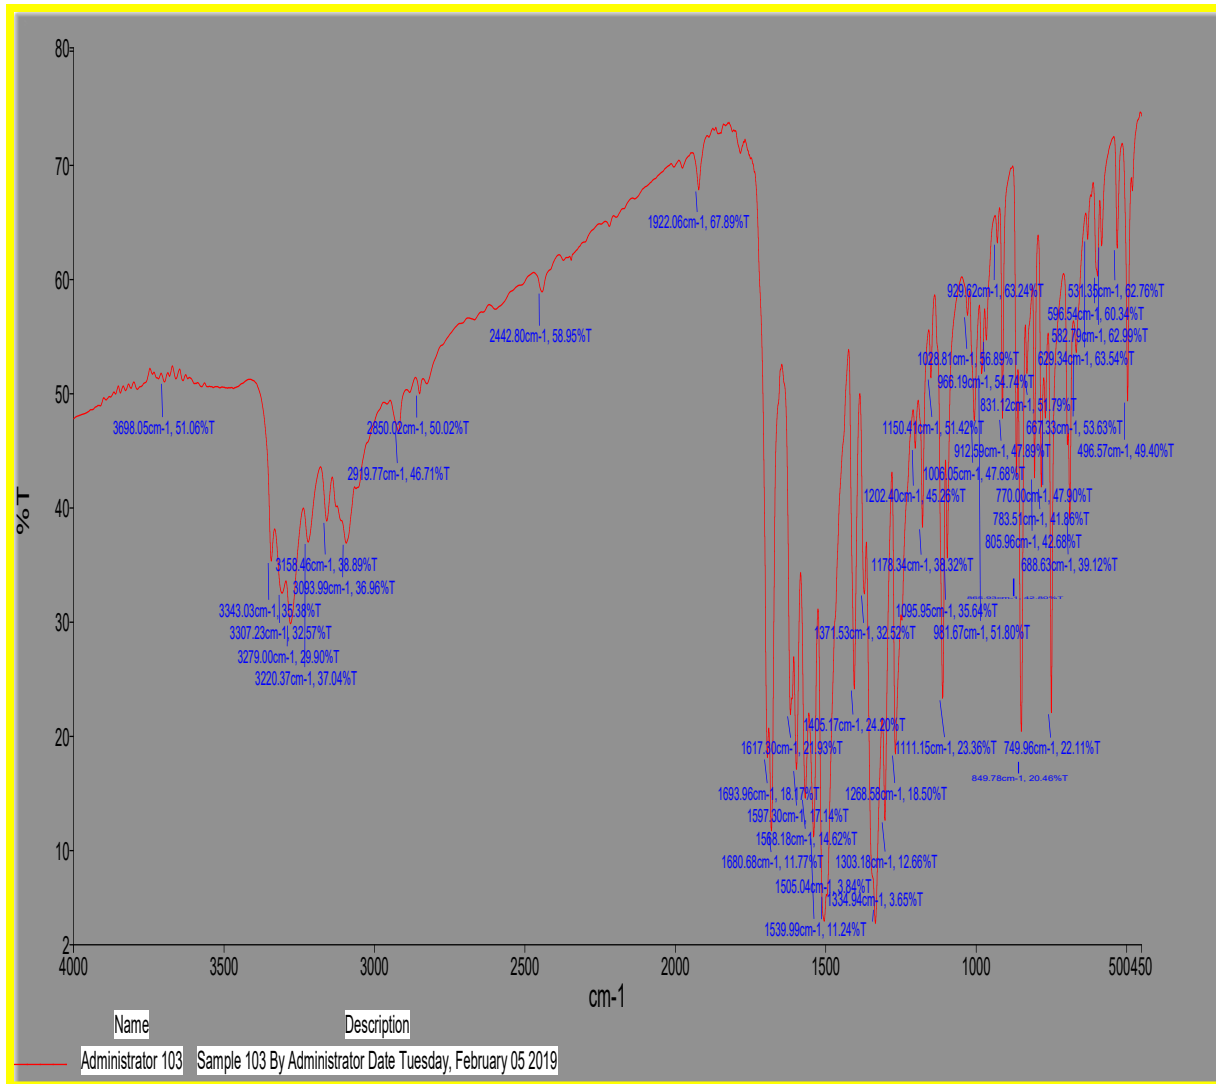

**Fig S39. (FT-IR).** (Z)-3-(4-nitrophenyl)-5-(quinoxalin-2-ylmethylene)-2-thioxothiazolidin-4-one (**L2b**)

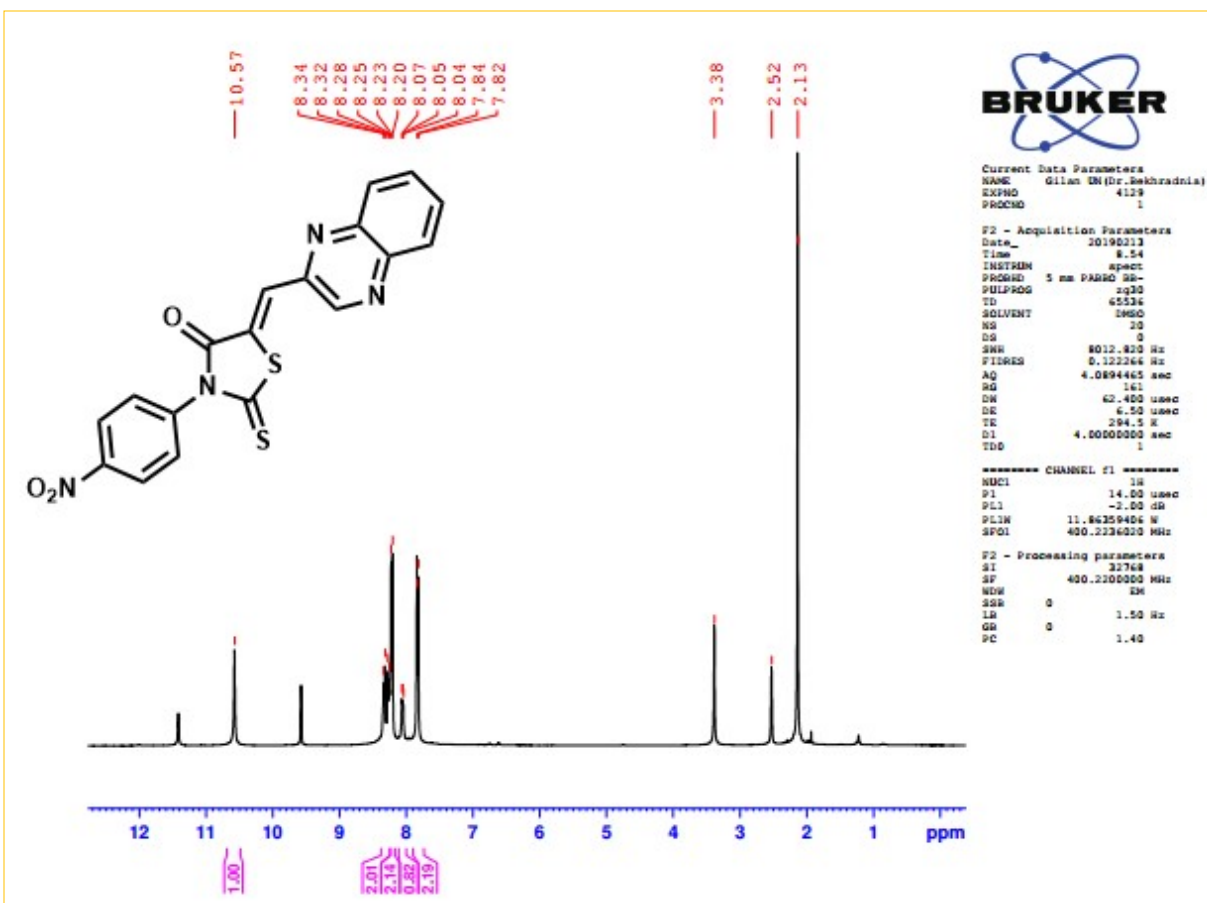

**Fig S40. <sup>1</sup>H NMR Spectra.** (Z)-3-(4-nitrophenyl)-5-(quinoxalin-2-ylmethylene)-2-thioxothiazolidin-4-one (**L2b**)

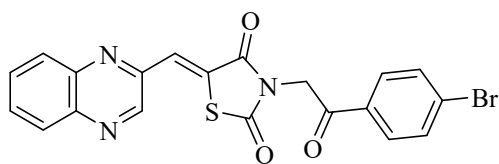

**(3-(2-bromophenyl)-2-oxoethyl)-5-(quinoxalin-2-ylmethylene) thiazolidine-2,4-Dione(L5b);** IR (KBr): 1743 and 1684  $\text{cm}^{-1}$  (C=O); <sup>1</sup>H NMR (400 MHz, DMSO  $d_6$ )  $\delta$ : 9.38 (s, 1H, H-3 Quinoxaline), 8.32 (s, 2H, CH), 8.23-8.28 (m, 1H, H-8 Quinoxaline), 8.14-8.19 (m, 1H, H-5 Quinoxaline), 8.04 (d, 2H, J = 8.4 Hz, H-2 and H-6 Phenyl), 7.93-8.00 (m, 2H, H-6 and H-7 Quinoxaline), 7.84 (d, 2H, J = 8.4 Hz, H-3 and H-5 Phenyl), 5.37 (s, 2H, CH<sub>2</sub>); <sup>13</sup>C NMR (100 MHz, DMSO  $d_6$ )  $\delta$ : 208, 191, 170, 165, 148, 147, 141, 133, 132, 131, 130, 129, 126, 47

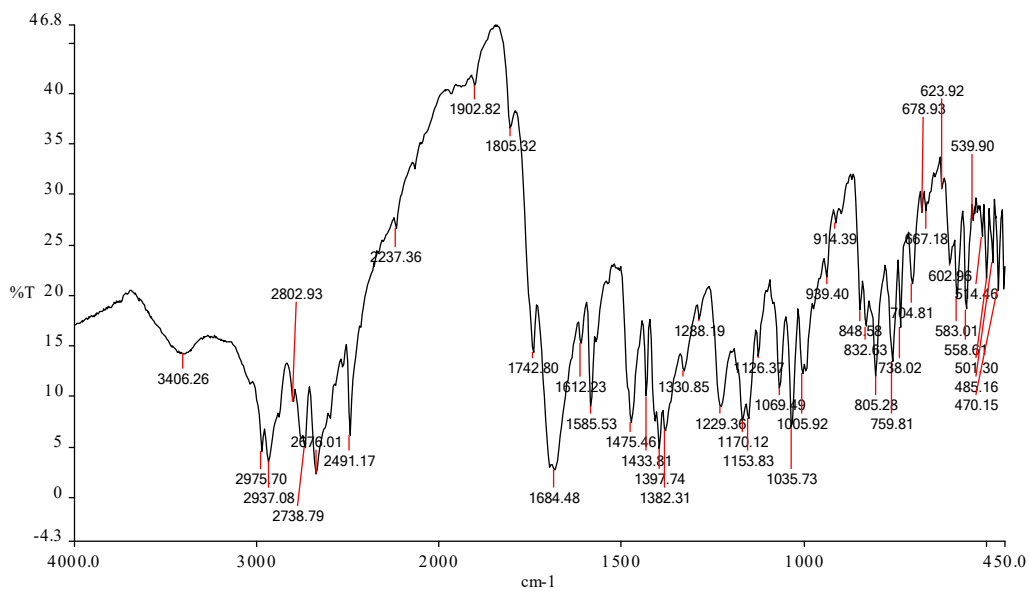

**Fig S41. (FT-IR).** (3-(2)-4-bromophenyl)-2-oxoethyl)-5-(quinoxalin-2-ylmethylene) thiazolidine-2,4-Dione (**L5b**)

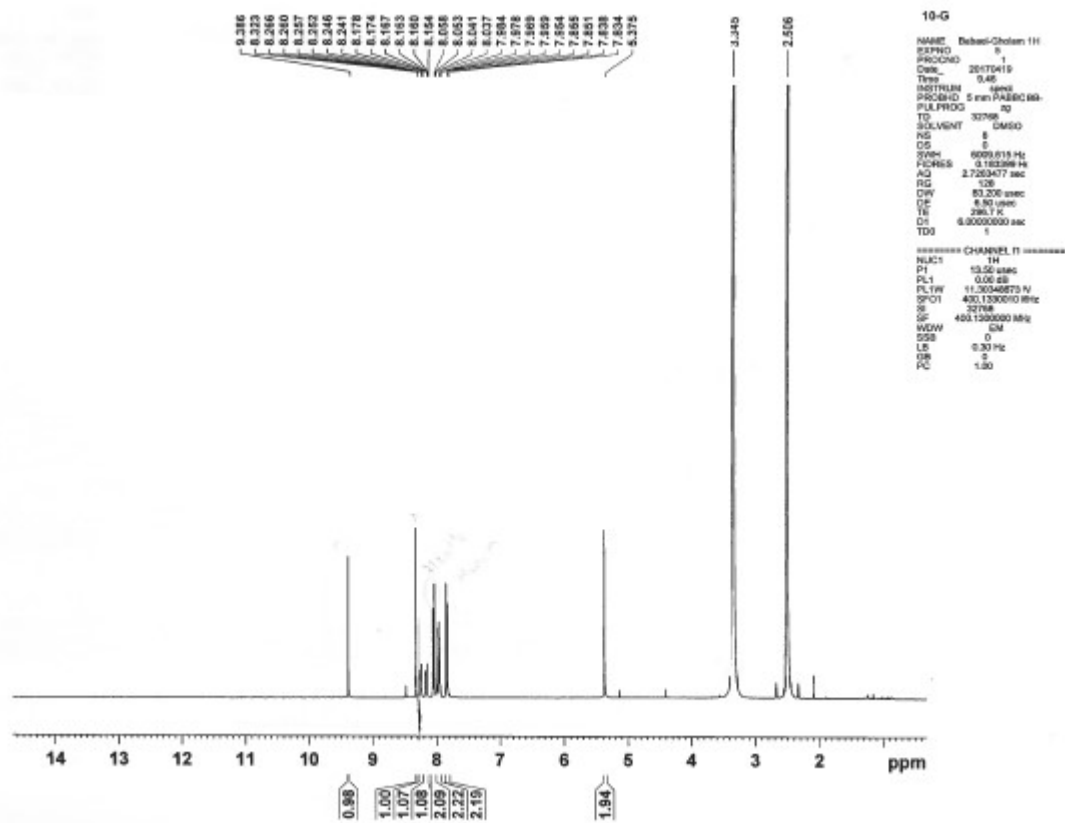

Fig S42. <sup>1</sup>H-NMR Spectra. (3-(2)-4-bromophenyl)-2-oxoethyl)-5-(quinoxalin-2-ylmethylene)thiazolidine-2,4-Dione (L5b)

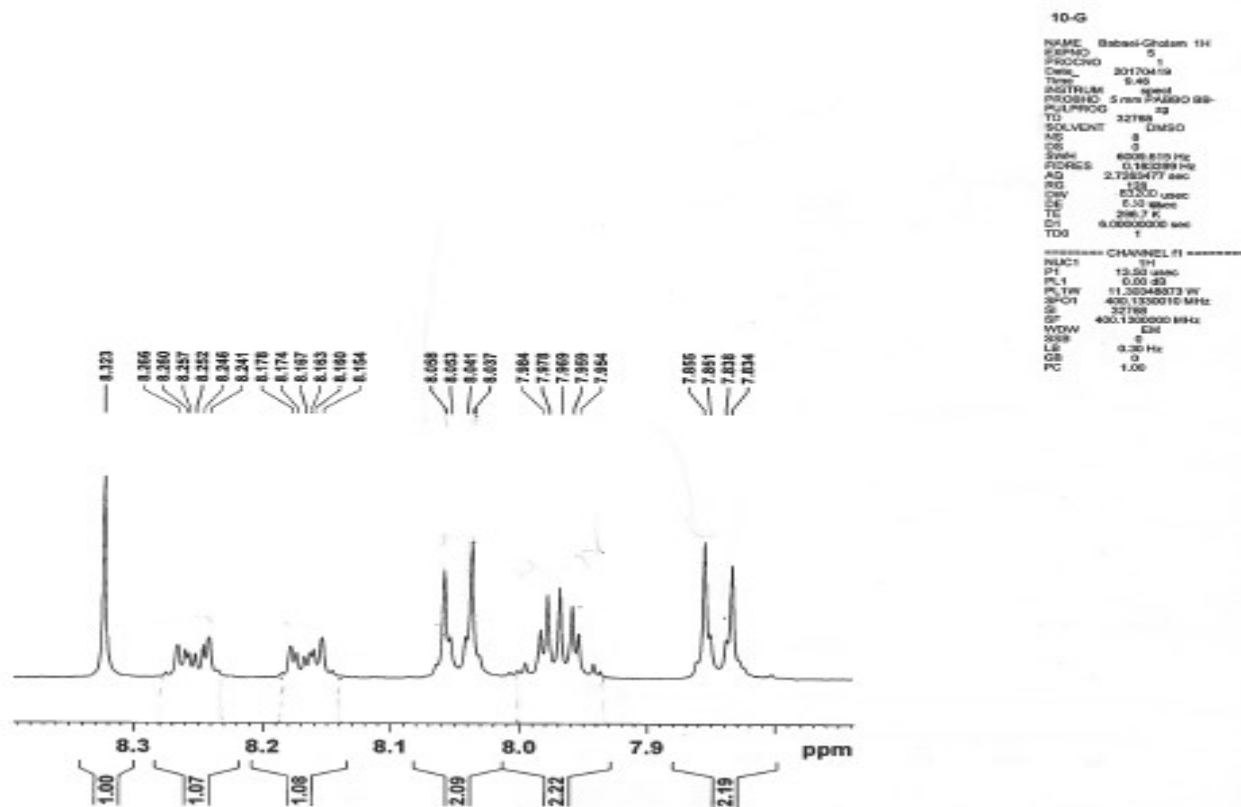

**Fig S43.**  $^1\text{H}$ NMR expand spectra. (3-(2)-4-bromophenyl)-2-oxoethyl)-5-(quinoxalin-2-ylmethylene) thiazolidine-2,4-dione (**L5b**)

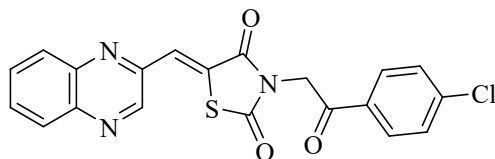

**3-(2-(4-chlorophenyl)-2-oxoethyl)-5-(quinoxalin-2-ylmethylene) thiazolidine-2,4-dione (L9a);** IR (KBr): 1743 and 1684  $\text{cm}^{-1}$  (C=O);  $^1\text{H}$ NMR (400 MHz, DMSO  $d_6$ )  $\delta$ : 9.39 (s, 1H, H-3 Quinoxaline), 8.33 (s, 2H, CH), 8.24-8.29 (m, 1H, H-8 Quinoxaline), 8.16-8.20 (m, 1H, H-5 Quinoxaline), 8.13 (d, 2H, J = 8.4 Hz, H-2 and H-6 Phenyl), 7.94-8.001 (m, 2H, H-6 and H-7 Quinoxaline), 7.70 (d, 2H, J = 8.8 Hz, H-3 and H-5 Phenyl), 5.38 (s, 2H,  $\text{CH}_2$ );

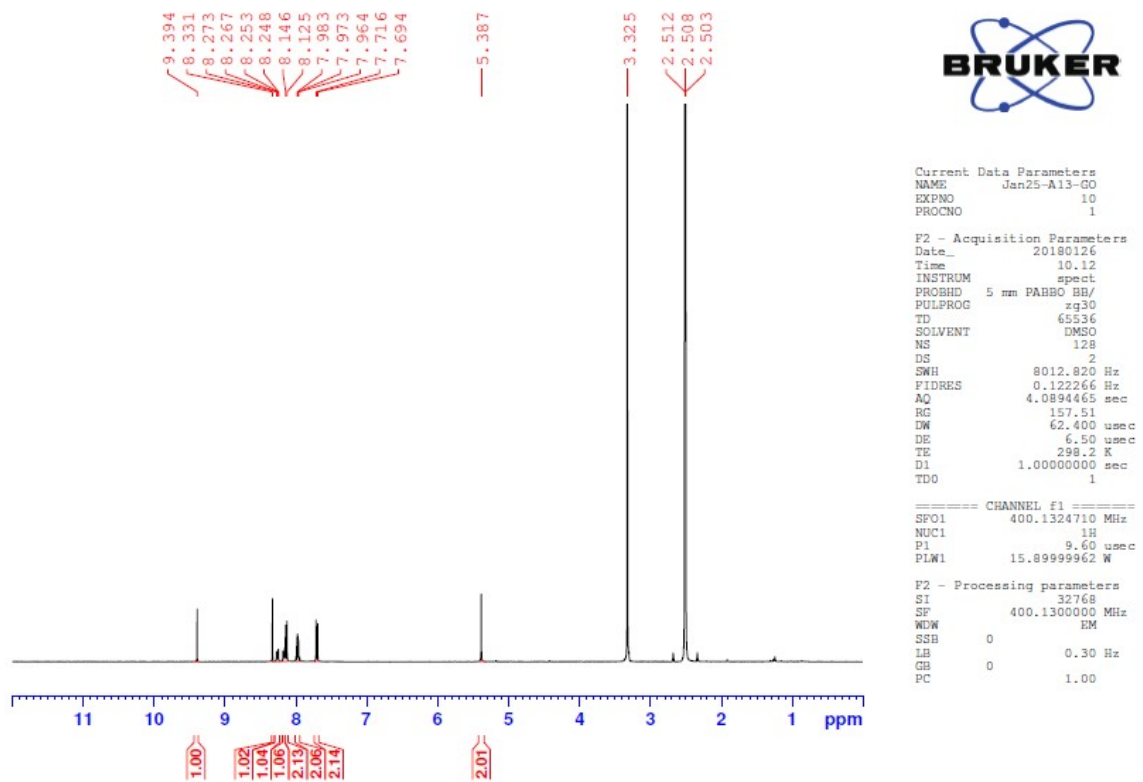

**Fig S44. <sup>1</sup>H NMR Spectra.** 3-(2-(4-chlorophenyl)-2-oxoethyl)-5-(quinoxalin-2-ylmethylene)thiazolidine-2,4-dione (**L9a**)

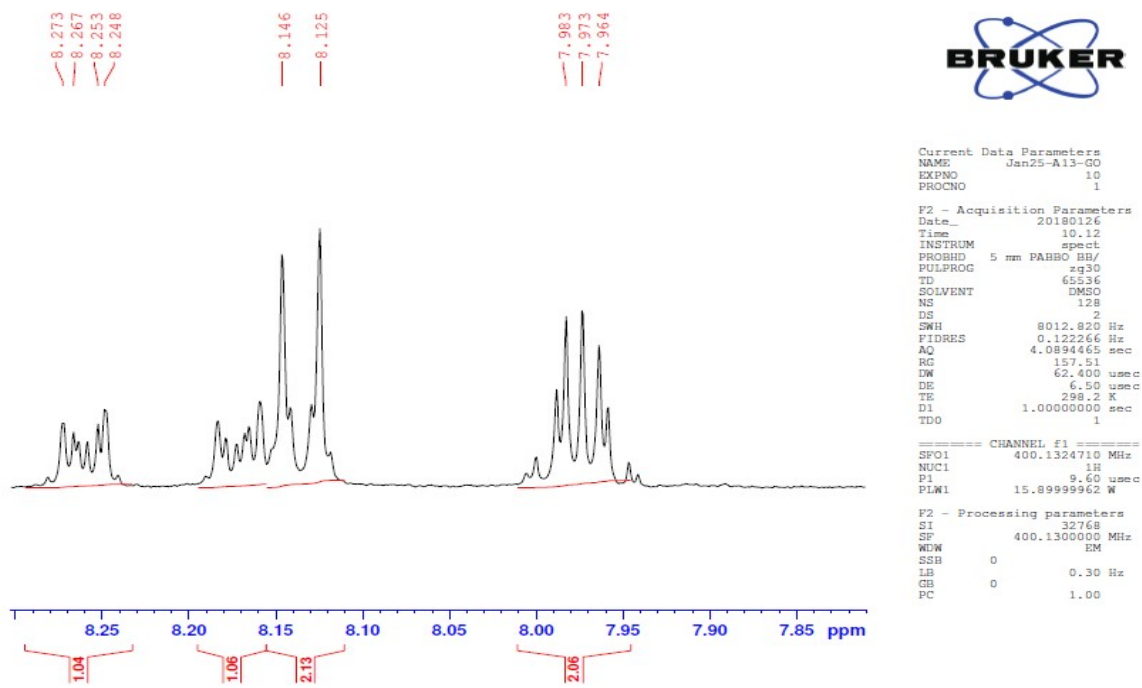

**Fig S45.** <sup>1</sup>H NMR expand spectra. 3-(2-(4-chlorophenyl)-2-oxoethyl)-5-(quinoxalin-2-ylmethylene)thiazolidine-2,4-dione (**L9a**).

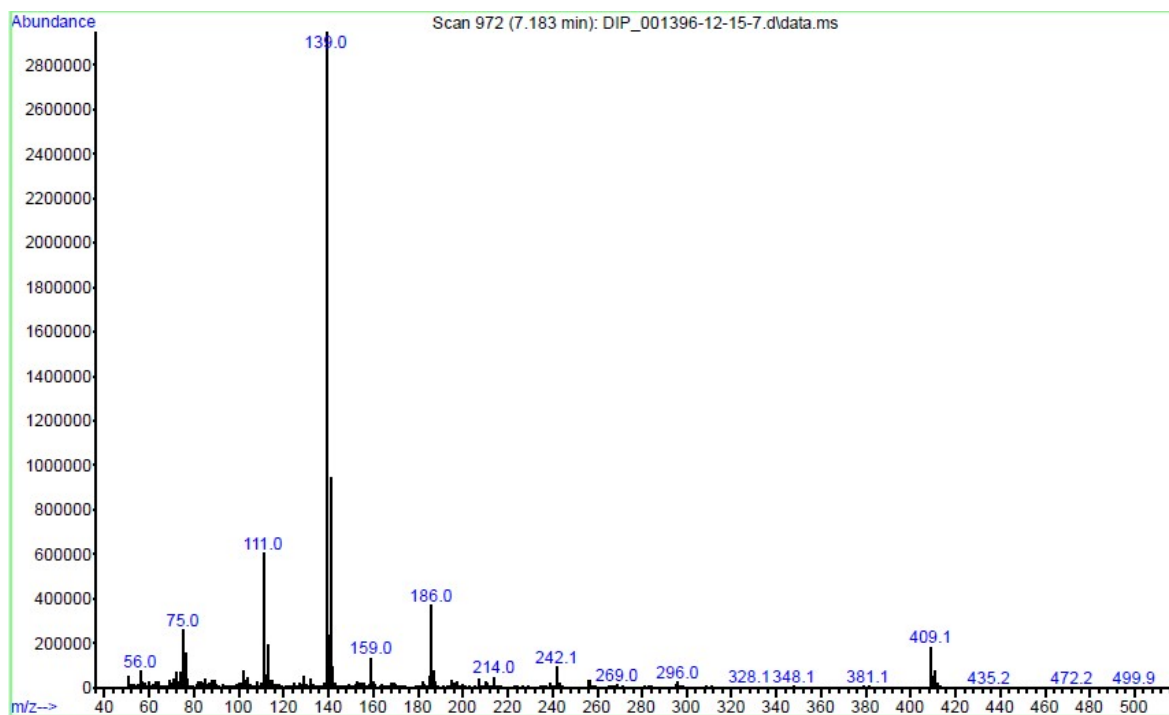

PDF Creator - PDF4Free v3.0

<http://www.pdf4free.com>

**Fig S46. Mass Spectra.** 3-(2)-4-chlorophenyl)-2-oxoethyl)-5-(quinoxalin-2-ylmethylene) thiazolidine-2,4-dione (**L9a**)

**3-(2)-4-methoxyphenyl)-2-oxoethyl)-5-(quinoxalin-2-ylmethylene) thiazolidine-2,4-dione (**L6b**);** IR (KBr): 1743 and 1684  $\text{cm}^{-1}$  (C=O);  $^1\text{H}$ NMR (400 MHz, DMSO  $d_6$ )  $\delta$ : 9.39 (s, 1H, H-3 Quinoxaline), 8.32 (s, 2H, CH), 8.23-8.30 (m, 1H, H-8 Quinoxaline), 8.14-8.20 (m, 1H, H-5 Quinoxaline), 8.09 (d, 2H, J = 8.4 Hz, H-2 and H-6 Phenyl), 7.93-8.01 (m, 2H, H-6 and H-7 Quinoxaline), 7.13 (d, 2H, J = 8.4 Hz, H-3 and H-5 Phenyl), 5.30 (s, 2H,  $\text{CH}_2$ ), 3.89 (s, 3H,  $\text{CH}_3$ );  $^{13}\text{C}$  NMR (100 MHz, DMSO  $d_6$ )  $\delta$ : 208, 191, 170, 165, 148, 147, 141, 133, 132, 131, 130, 129, 126, 47



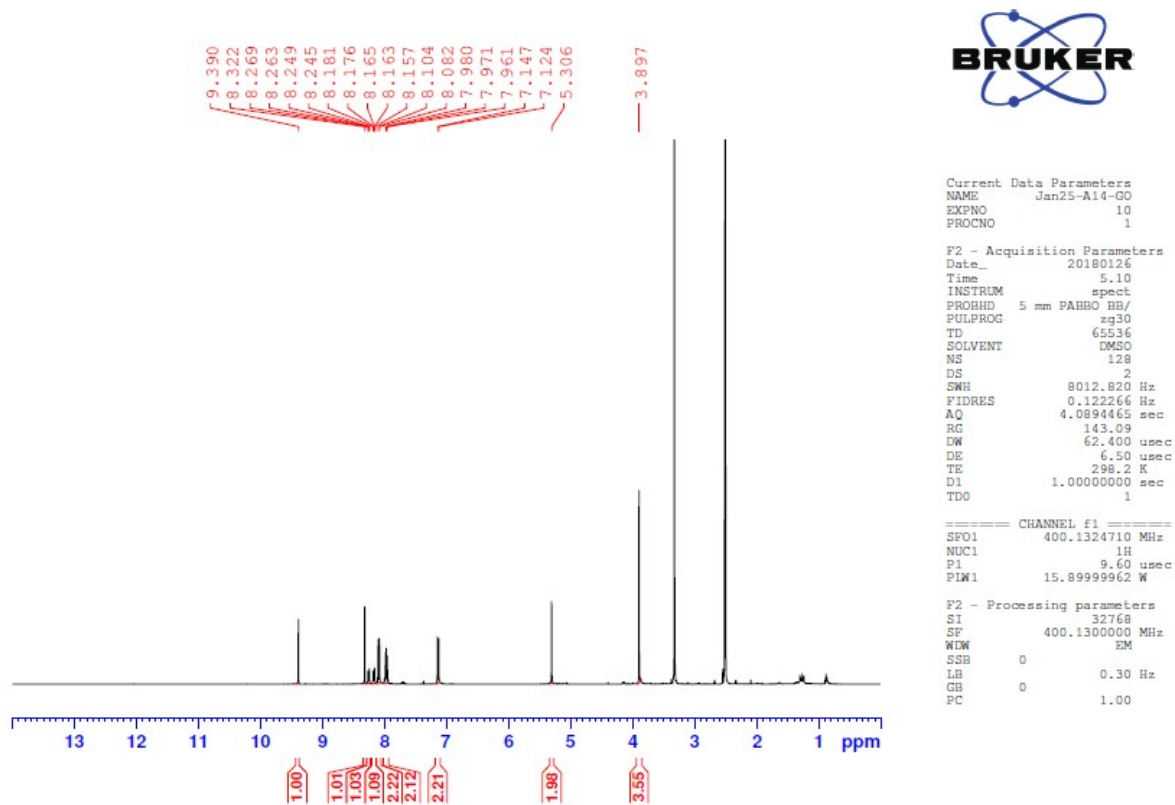

**Fig S47. <sup>1</sup>H NMR Spectra.** 3-(2-(4-methoxyphenyl)-2-oxoethyl)-5-(quinoxalin-2-ylmethylene)thiazolidine-2,4-dione (**L6b**)

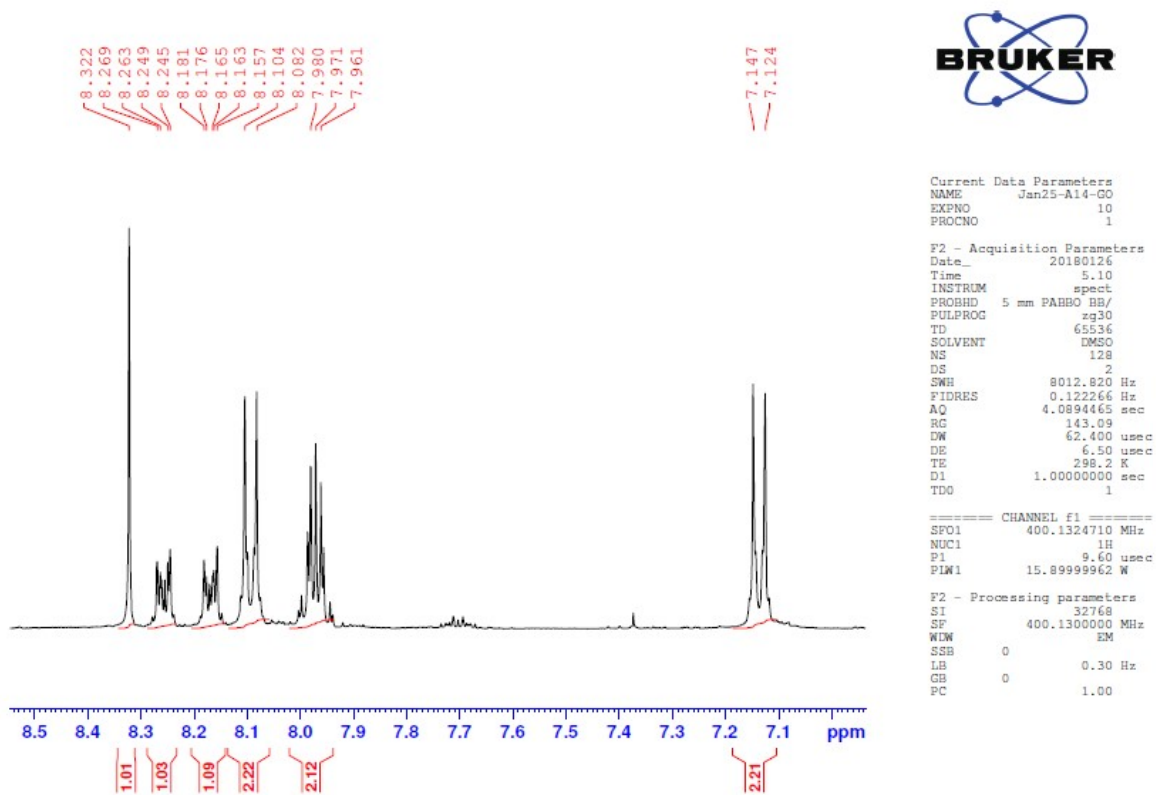

**Fig S48. <sup>1</sup>H NMR expand spectra. 3-(2)-4-methoxyphenyl)-2-oxoethyl)-5-(quinoxalin-2-ylmethylene) thiazolidine-2,4-dione (L6b)**

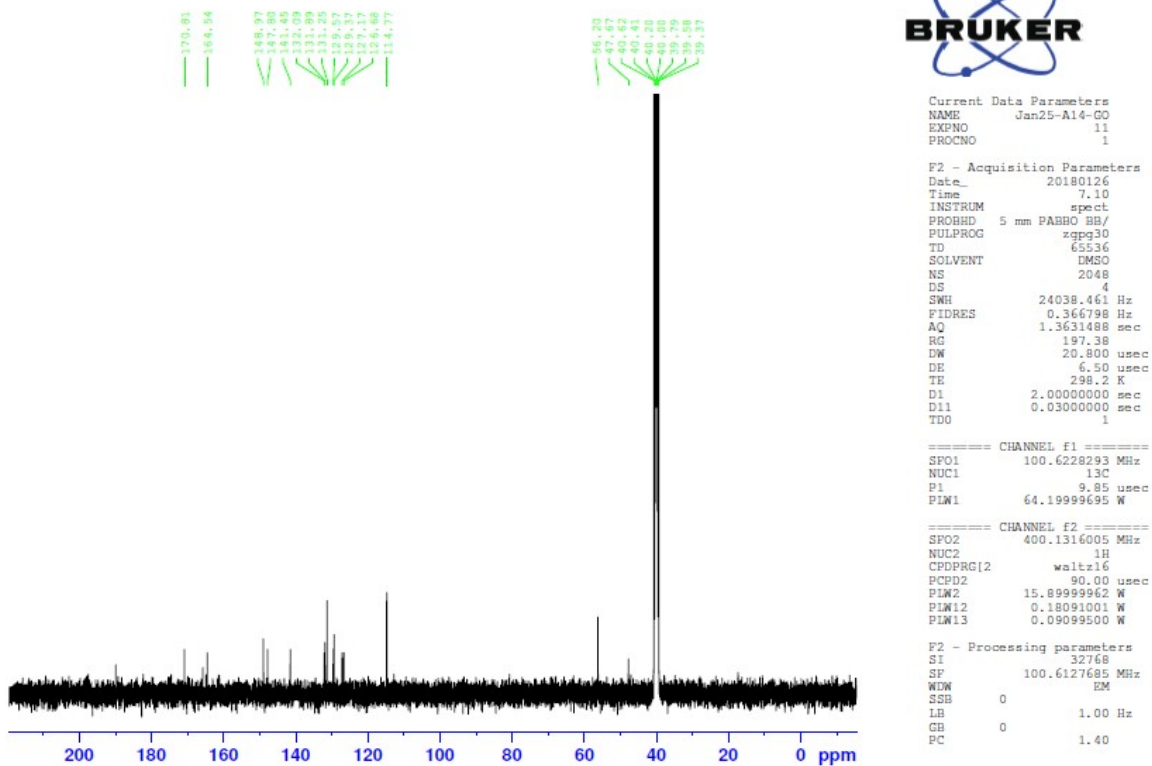

**Fig S49. <sup>13</sup>CNMR Spectra.** 3-(2-(4-methoxyphenyl)-2-oxoethyl)-5-(quinoxalin-2-ylmethylene)thiazolidine-2,4-dione (**L6b**)

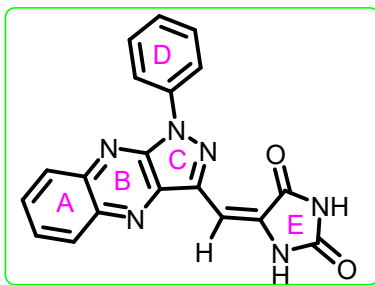

**5-((1-phenyl-1*H*-pyrazolo[3,4-*b*]quinoxalin-3-yl)methylene)imidazolidine-2,4-dione (L1a);** <sup>1</sup>HNMR (400 MHz, CDCl<sub>3</sub>) δ (ppm): 8.56 (s, 1H, N<sub>1</sub>H Imidazolidine), 8.27 (s, 1H, N<sub>2</sub>H Imidazolidine), 7.84-7.89 (m, 2H, H-2 and H-6 ring D), 7.78-7.83 (m, 2H, H-5 and H-8 Quinoxaline), 7.44-7.57 (m, 4H, H-6 and H-7 Quinoxaline, H-3 and H-5 ring D), 7.53 (s, 1H, H Arylidene), 7.47 (tt, 1H, H-4 ring D, *J* = 7.2 and 1.2 Hz). <sup>13</sup>C-NMR (400 MHz, CDCl<sub>3</sub>) δ (ppm): 119.2, 122.3, 123.5 (Aromatic carbons ring D); 127.3, 129.1, 129.6, 130.5, 134.7, 139.6, 142.9, 152.8.

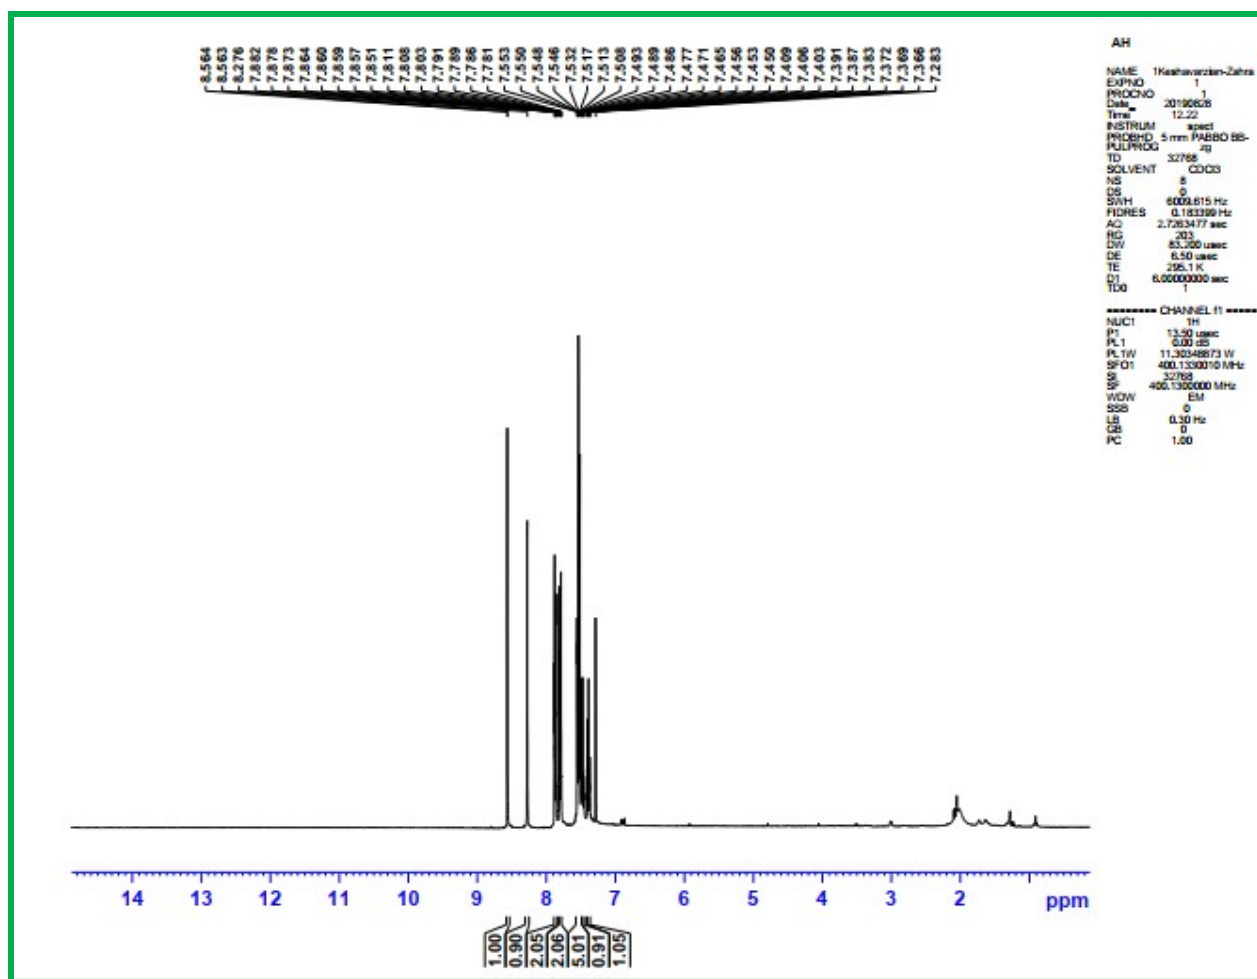

**Fig S50. <sup>1</sup>H NMR Spectra.** 5-((1-phenyl-1*H*-pyrazolo[3,4-*b*]quinoxalin-3-yl)methylene)imidazolidine-2,4-dione (**L1a**)

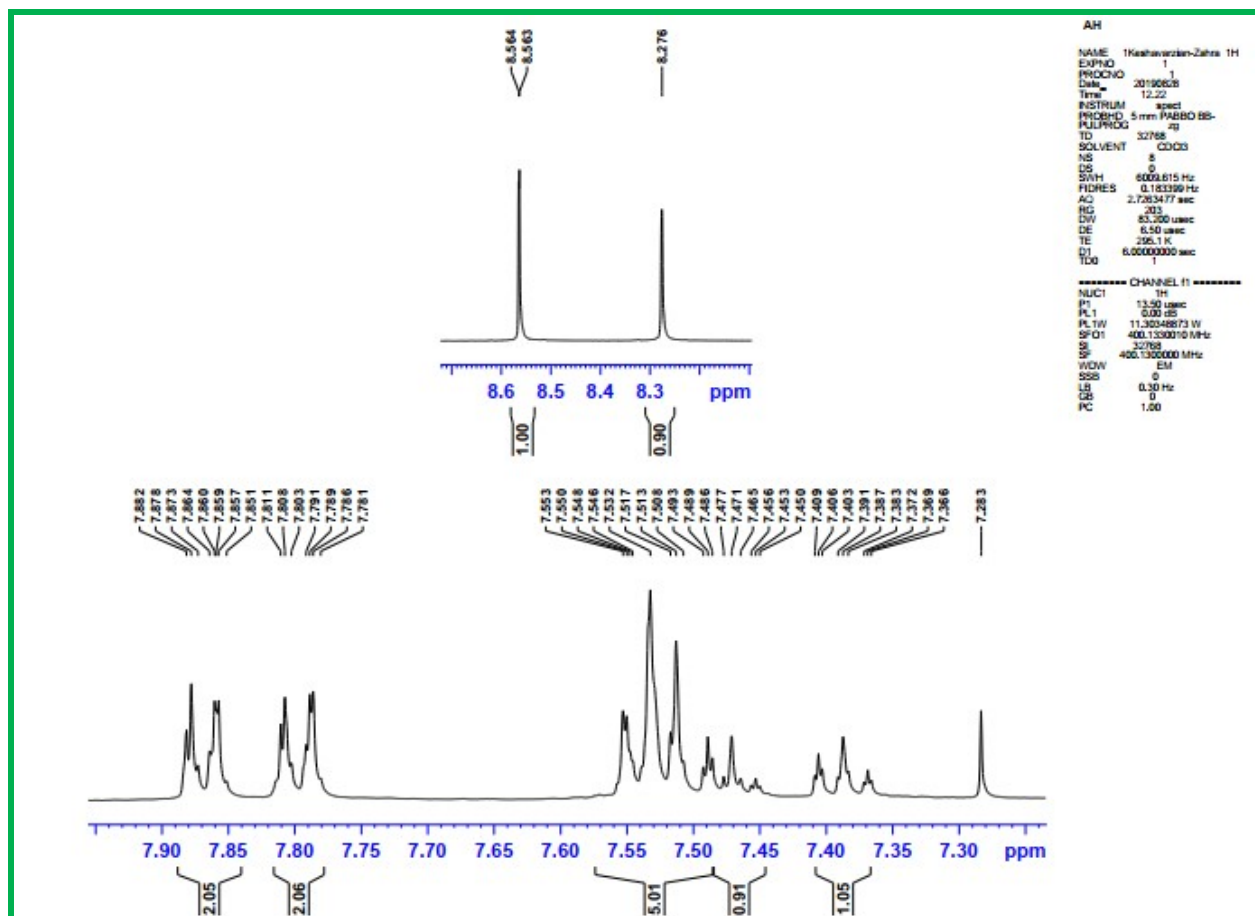

Fig S51. <sup>1</sup>H NMR expand spectra. 5-((1-phenyl-1*H*-pyrazolo[3,4-*b*] quinoxalin-3 yl) methylene) imidazolidine-2,4-dione (**L1a**)

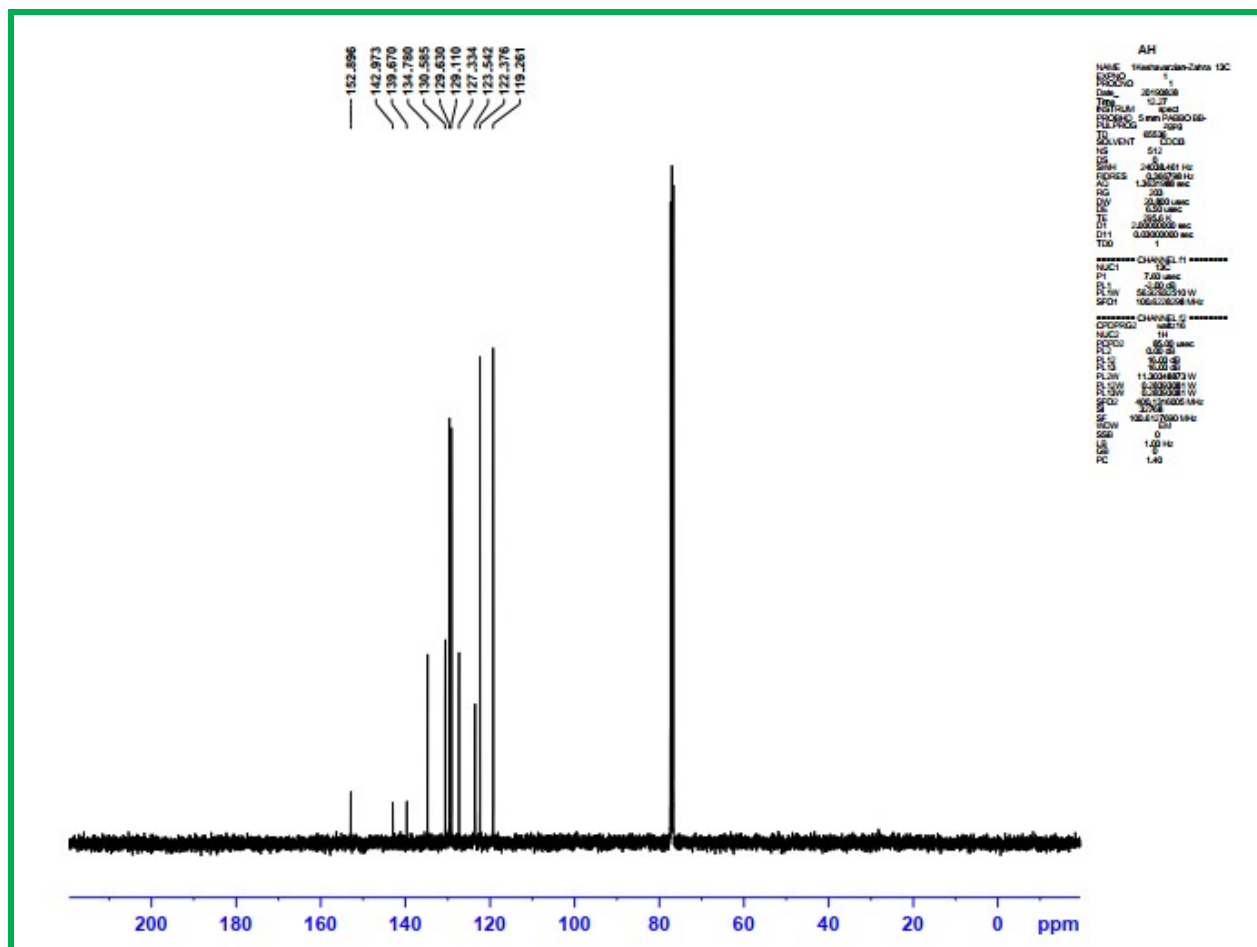

Fig S52. <sup>13</sup>CNMR spectra. 5-((1-phenyl-1*H*-pyrazolo[3,4-*b*] quinoxalin-3 yl) methylene) imidazolidine-2,4-dione (L1a)

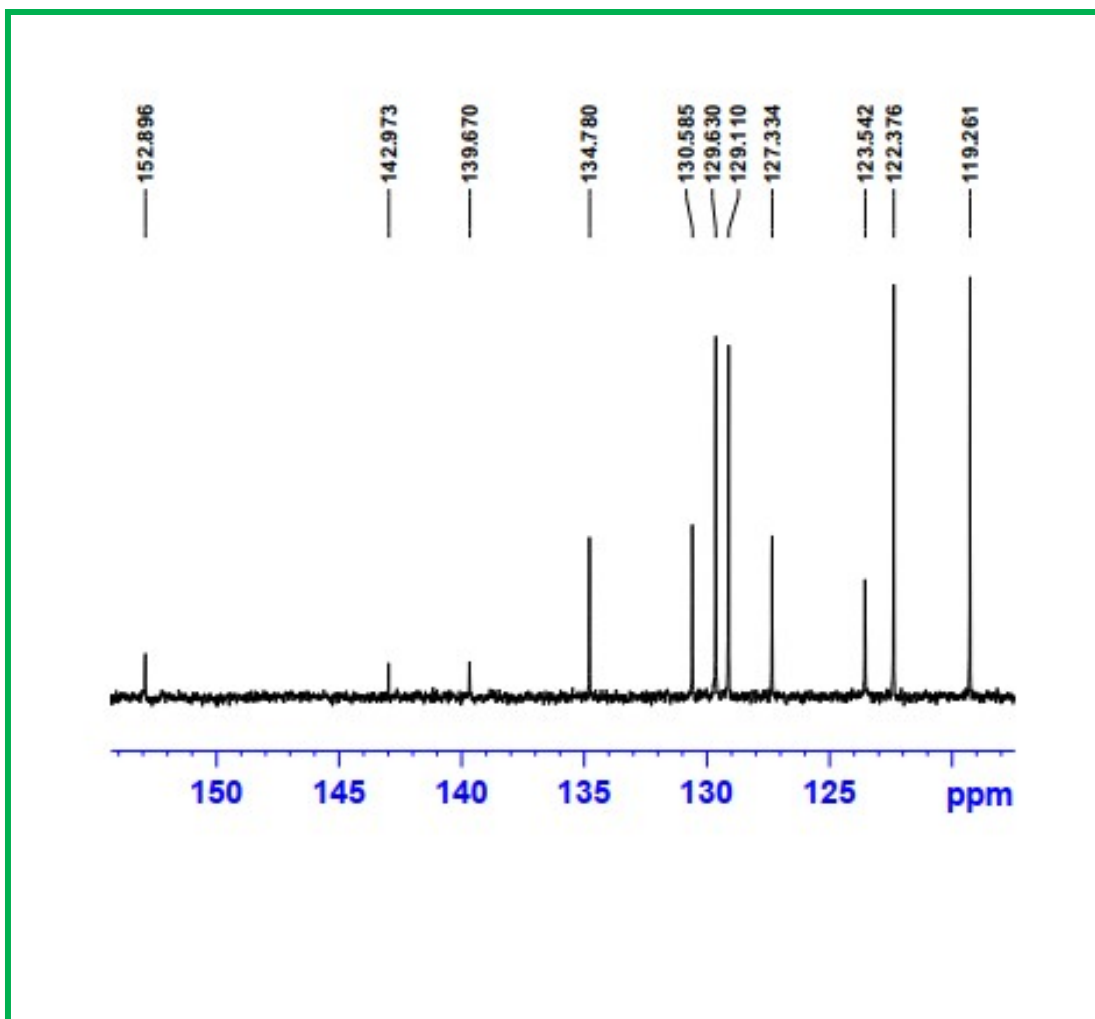

**Fig S53.**  $^{13}\text{C}$ NMR expand spectra. 5-((1-phenyl-1*H*-pyrazolo[3,4-*b*]quinoxalin-3-yl)methylene)imidazolidine-2,4-dione (**L1a**)

**3-(2-oxo-2-(thiophen-3-yl)ethyl)-5-(quinoxaline-2-yl methylene) thiazolidine 2,4 dione (**L3c**);**  $^1\text{H}$ -NMR (400MHz, DMSO);  $\delta$ :9.37(s,1H, H-3 Quinoxaline),5.13(s,1H, H-Vinyl),8.15-8.22(m,1H,H-8 Quinoxaline), 8.05-8.11(m,1H,H-5 Quinoxaline) 8.11(d,d,1H, $J=5\text{Hz}$  and  $J=1.2\text{Hz}$ , H-3 Thiophen) 7.87-7.92(m,2H,H-6 and H-7 quinoxaline) 7.30(AB Quartet,1H, $J=4.8\text{Hz}$  and  $J=4\text{Hz}$ )5.23(s, 2H, $\text{CH}_2$ );  $^{13}\text{C}$ -NMR (100MHz, DMSO);  $\delta$ :184.91,170.76,165.60 (C=O), 148.9, 147.7, 141.4, 136.9, 135.5, 132.1, 131.8, 129.6, 129.4, 126.8, 48.0( $\text{CH}_2$ ).



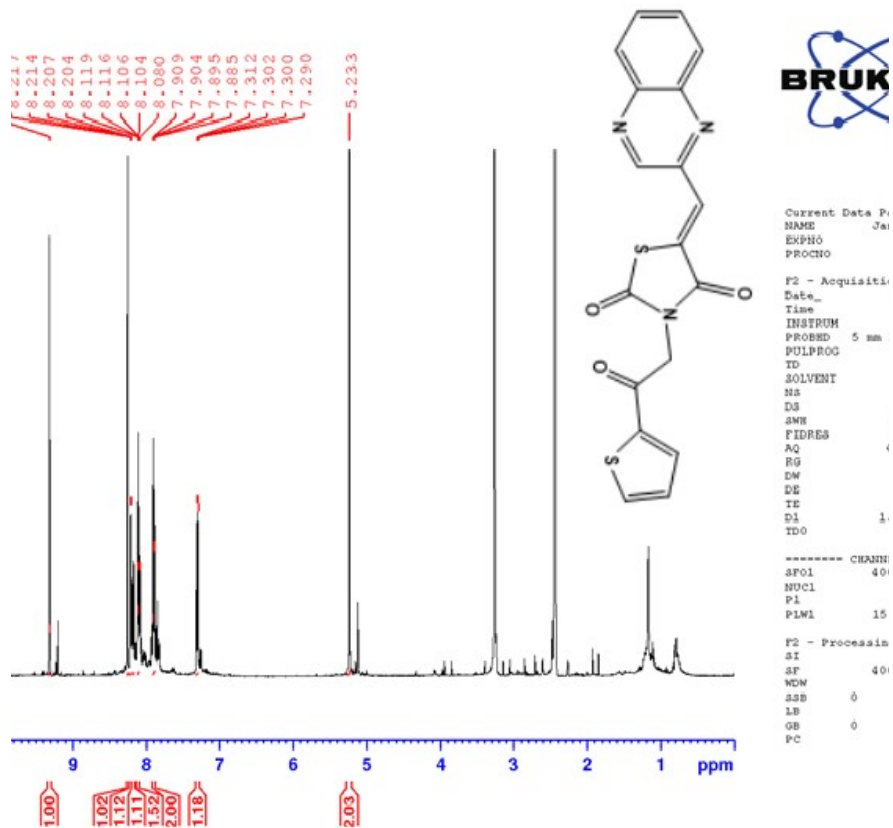

**Fig S54.** <sup>1</sup>H NMR Spectra. 3-(2-oxo-2-(thiophen-3-yl)ethyl)-5-(quinoxaline-2-yl methylene) thiazolidine 2,4 dione (**L3c**)

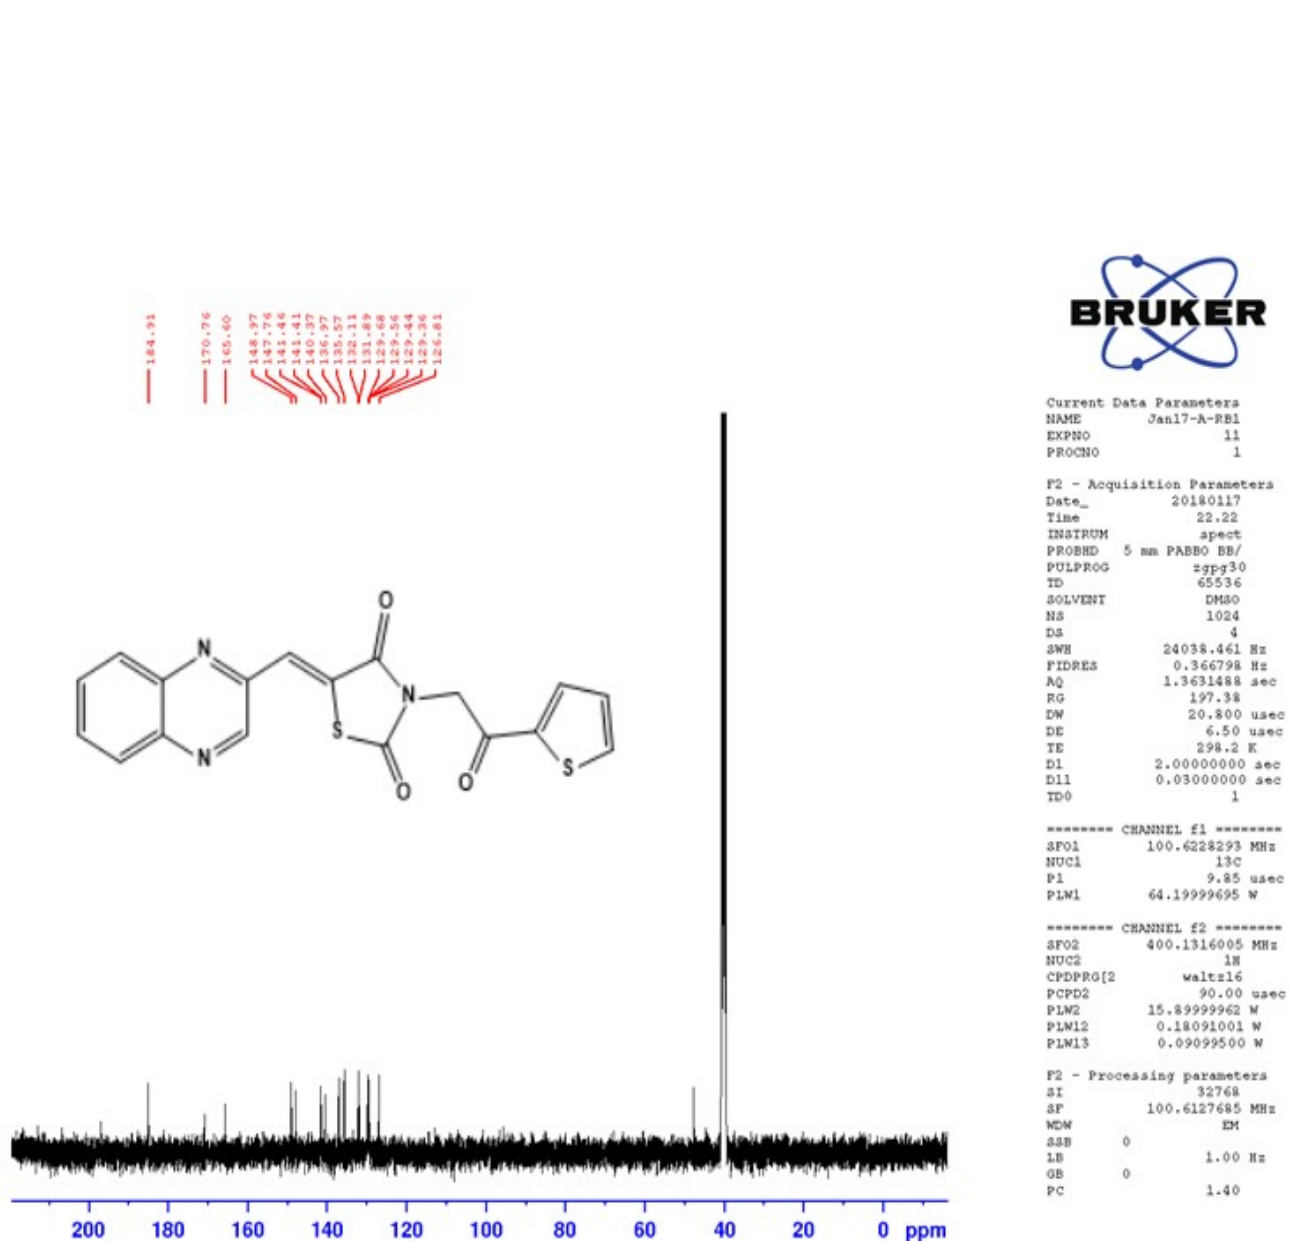

**Fig S55.**  $^{13}\text{C}$ NMR Spectra. 3-(2-oxo-2-(thiophen-3-yl)ethyl)-5-(quinoxaline-2-yl methylene) thiazolidine 2,4 dione (**L3c**)

**3-(2-oxo-2-phenyl ethyl)-5-(quinoxaline-2-yl methylene)thiazolidine 2,4 dione(L4b);**  
 IR (KBr,  $\text{cm}^{-1}$ )  $\nu_{\text{max}}$ :1695,1754 $\text{cm}^{-1}$ (C=O),1544 $\text{cm}^{-1}$ (C=N),1499 $\text{cm}^{-1}$ (C=C)1447 $\text{cm}^{-1}$ (C-N) $^1\text{H}$ -  
 $^1\text{H}$ -NMR(400) MHz, DMSO);  $\delta$ :8/99(s,1H, H-3Quinoxaline), 4.42(s,1H, H Vinyl),5.17(s,2H,

CH<sub>2</sub>C=O), 8.14-8.16(d, d,2H, Quinoxaline), 7.89-7.91(d, d,2H, Quinoxaline)7.78-7.80(m,2H, Acetophenone)7.53 7.55(m,2H, Acetophenone)7.48-7.50(m,1H, acetophenone); <sup>13</sup>C-NMR (100MHz, DMSO); 191.3, 172.4, 172.1, 146.0, 139.1, 133.1, 129.6, 129.4, 129.1, 127.6, 127.5, 48.0.

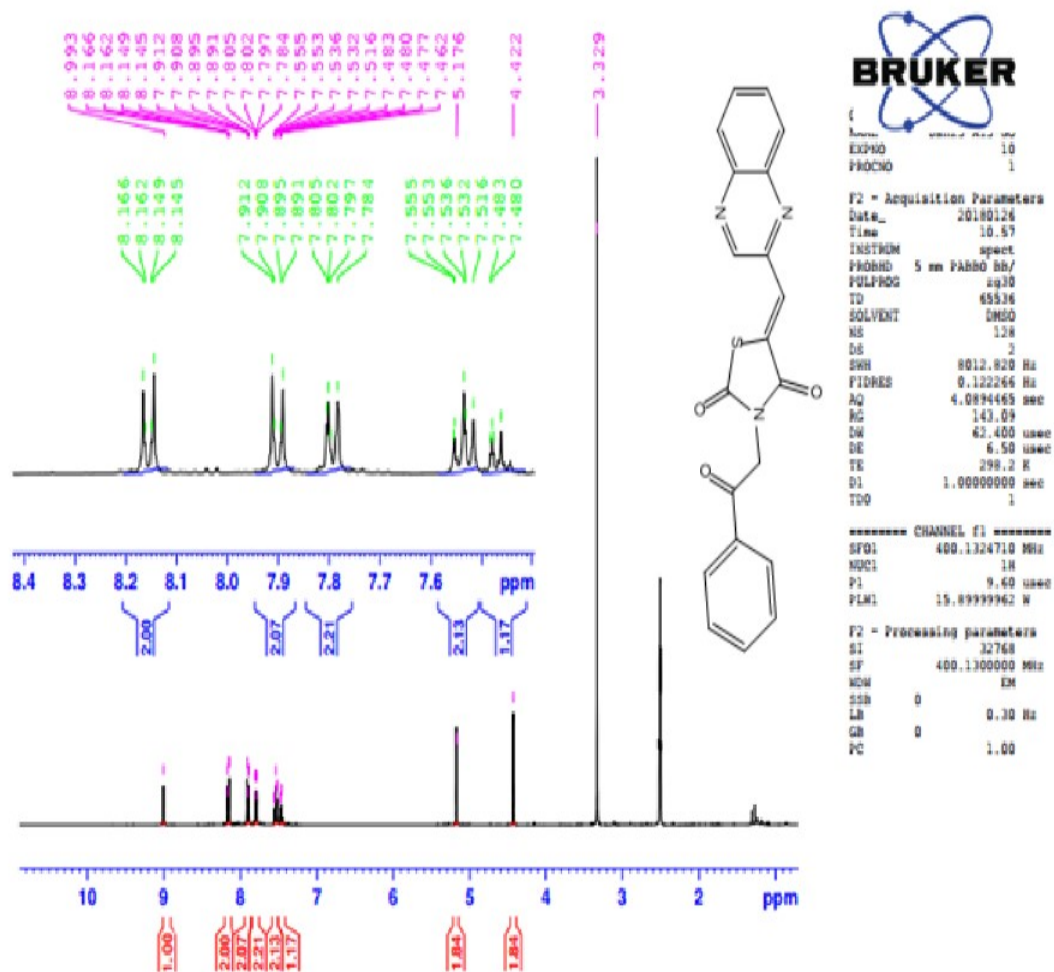

**Fig S56. <sup>1</sup>H NMR Spectra.** 3-(2-oxo-2-phenyl ethyl)-5-(quinoxaline-2-yl methylene)thiazolidine 2,4 dione (L4b)

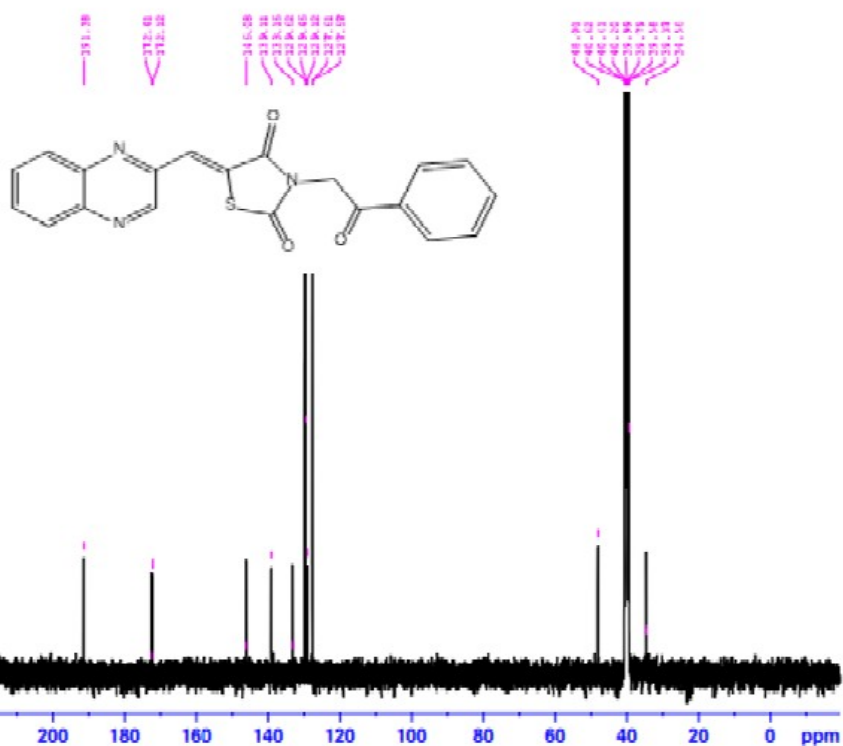

```

Current Data Parameters
NAME      Jan12-A13-20
EXPNO    11
PROCNO   1

F2 - Acquisition Parameters
Date_    20180127
Time     6.20
INSTRUM  spect
PROBHD   5 mm PABBO BB/
PULPROG  zgpg30
TD       65536
SOLVENT  DMSO
NS       2048
DS       4
SWH      24038.461 Hz
FIDRES   0.364738 Hz
AQ       1.1631488 sec
RG       197.38
DW       20.800 usec
DE       6.50 usec
TE       300.2 K
D1       2.0000000 sec
D11      0.0300000 sec
TD0      1

===== CHANNEL f1 =====
SF01     100.6226292 MHz
NUC1     13C
P1       9.85 usec
PLW1     64.19999695 W

----- CHANNEL f2 -----
SF02     400.1316005 MHz
NUC2     1H
CPOPRG12  waltz16
PCPDJ2   90.00 usec
PLD2     15.89999962 W
PLW2     0.18091001 W
PLW12    0.02027500 W

F2 - Processing parameters
SI       32768
SF       100.6127685 MHz
WDW      EM
SSB      0
GB       0
PC       1.40
  
```

Fig S57. <sup>13</sup>CNMR Spectra. 3-(2-oxo-2-phenyl ethyl)-5-(quinoxaline-2-yl methylene)thiazolidine 2,4 dione (L4b)

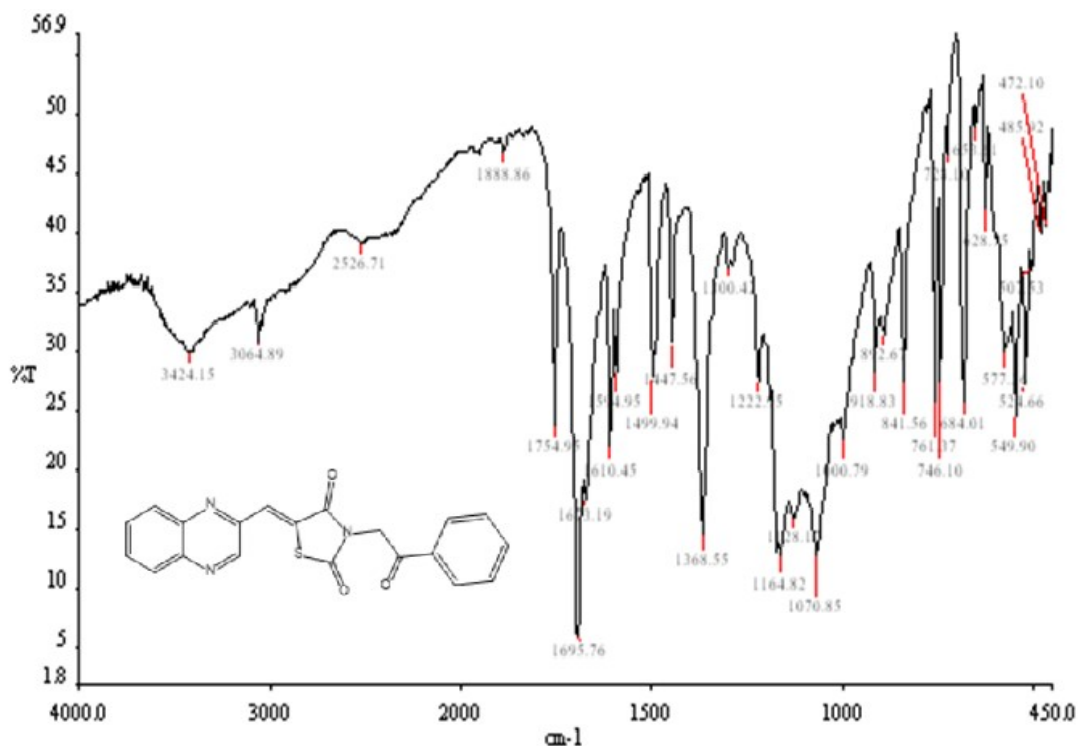

**Fig S58. FTIR Spectra.** 3-(2-oxo-2-phenyl ethyl)-5-(quinoxaline-2-yl methylene) thiazolidine 2,4 dione (**L4b**)

**(Z)-5-((6-chloroquinoxalin-2-yl) methylene)-3-methyl-2-thioxothiazolidin-4-one(L5a)**; IR (KBr, cm<sup>-1</sup>)  $\nu$ : 2922(C-H aromatic), 1706(C=O), 1474(C=N), 1299(C=C). <sup>1</sup>HNMR (400 MHz, DMSO d<sub>6</sub>)  $\delta$ : 9.04(s, 1H, H-3 Quinoxaline), 7.85(s, 1H, H<sub>c=c</sub>), 8.02(d, 1H, J=9.2 Hz, H-8 Quinoxaline), 8.14(d, 1H, J=2.4, Hz H-5 Quinoxaline), 8.08 (d, J=9.2 Hz 1H, H-7 Quinoxaline), 3.59(s, 3H, CH<sub>3</sub>) ppm; <sup>13</sup>C NMR (100 MHz, DMSO-d<sub>6</sub>)  $\delta$ : 29.70 (C-Me), 123.05, 127.97, 128.38, 130.42, 132.35, 132.68, 137.38, 141.54, 147.96, 178.82, 203.01.

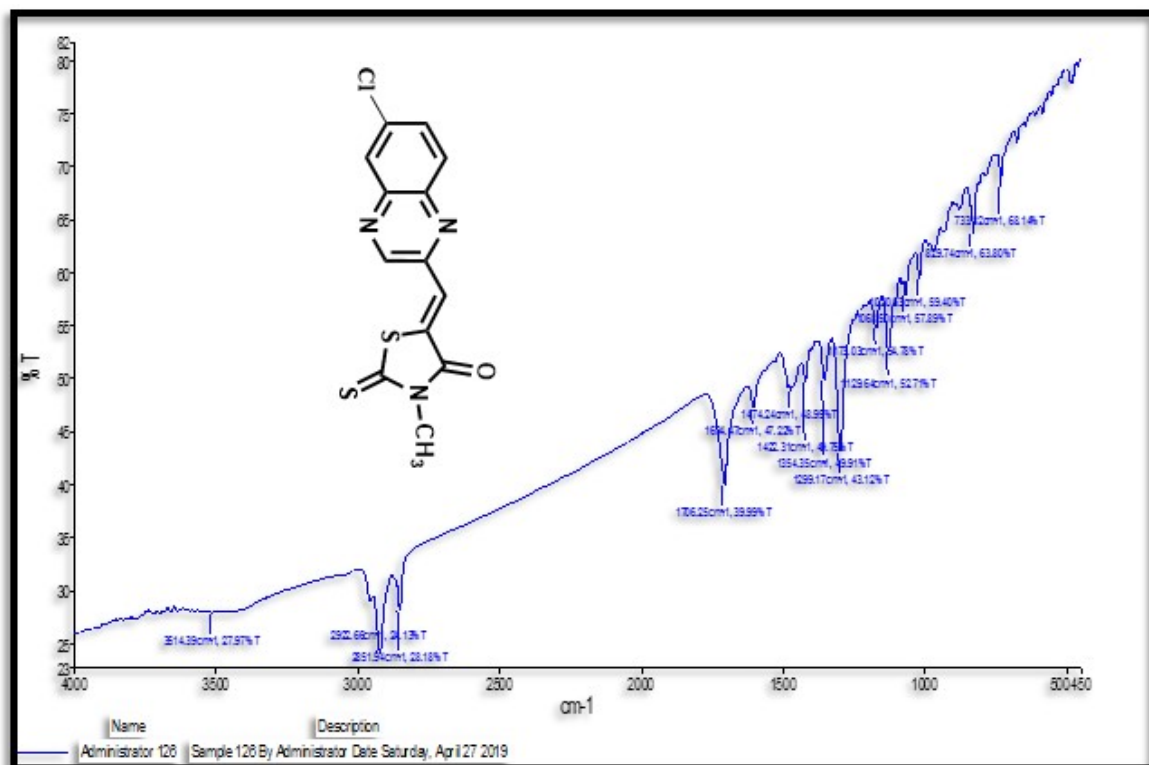

**Fig S59. FTIR Spectra.** (Z)-5-((6-chloroquinoxalin-2-yl)methylene)-3-methyl-2-thioxothiazolidin-4-one (L5a)

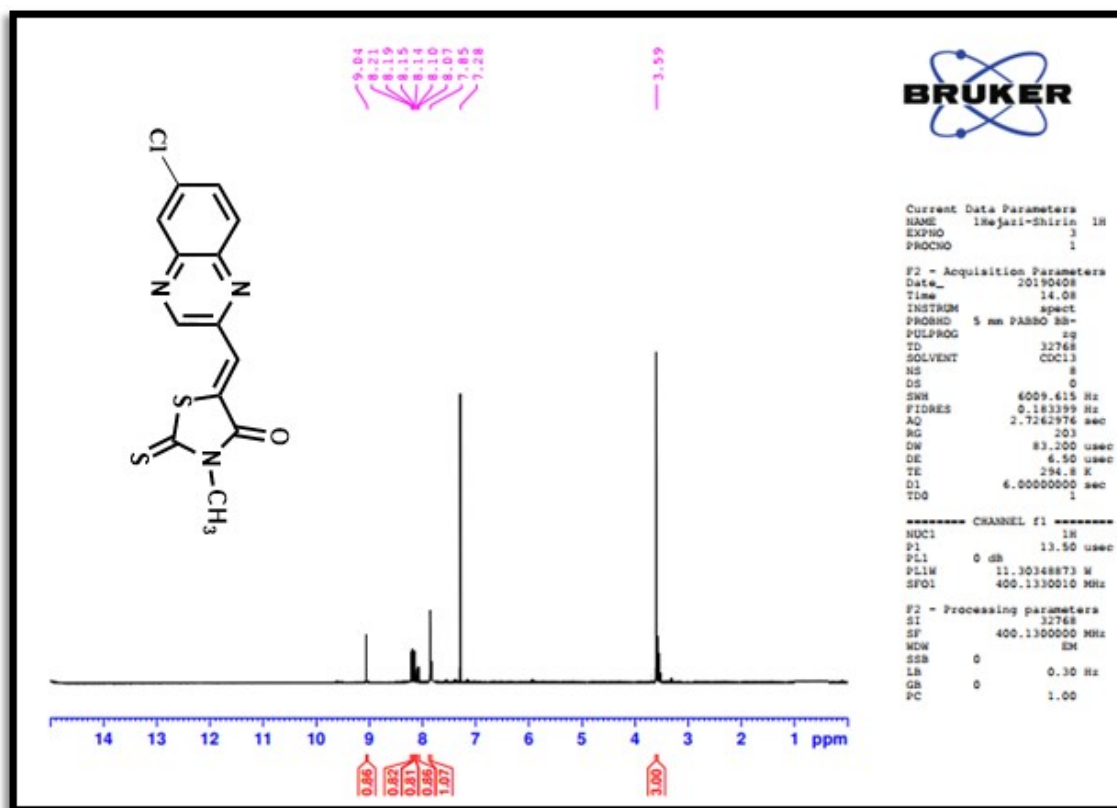

**Fig S60. <sup>1</sup>H NMR Spectra.** (Z)-5-((6-chloroquinoxalin-2-yl) methylene)-3-methyl-2-thioxothiazolidin-4-one (L5a)

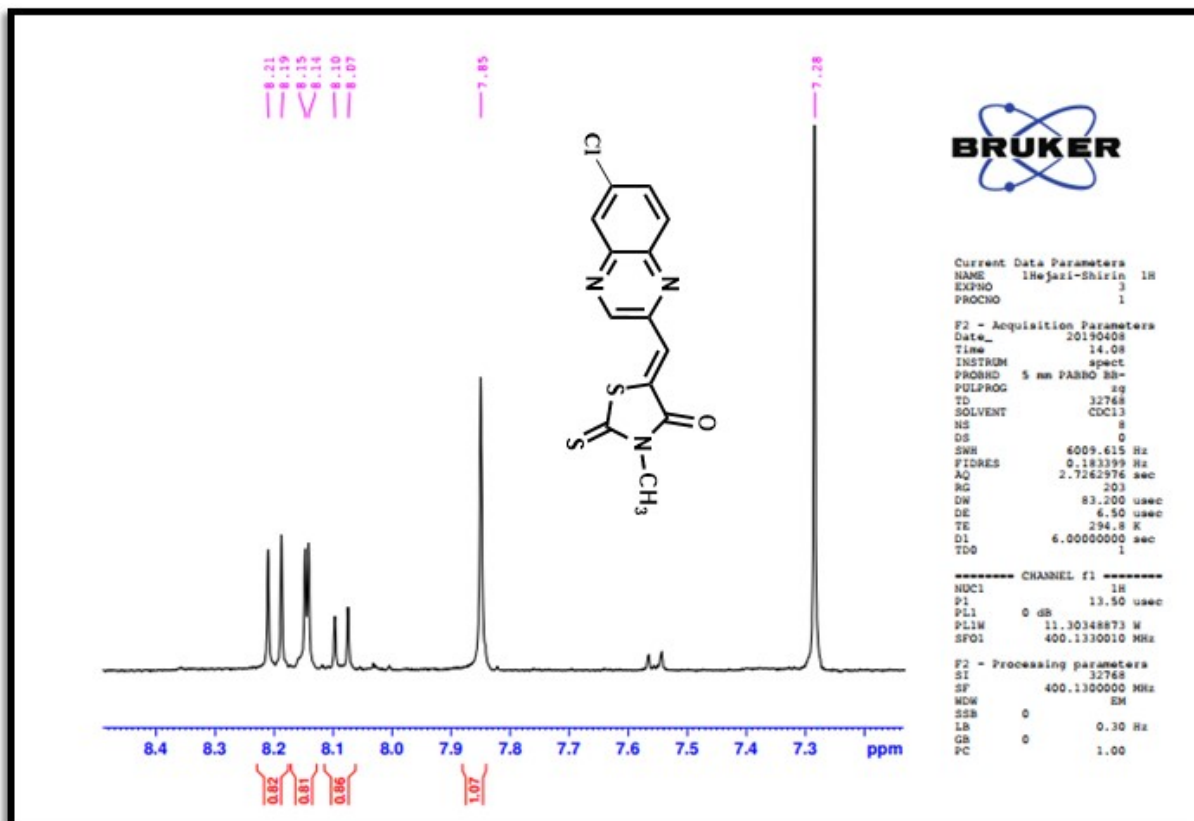

Fig S61. <sup>1</sup>H NMR expand Spectra. (Z)-5-((6-chloroquinoxalin-2-yl) methylene)-3-methyl-2-thioxothiazolidin-4-one (L5a)



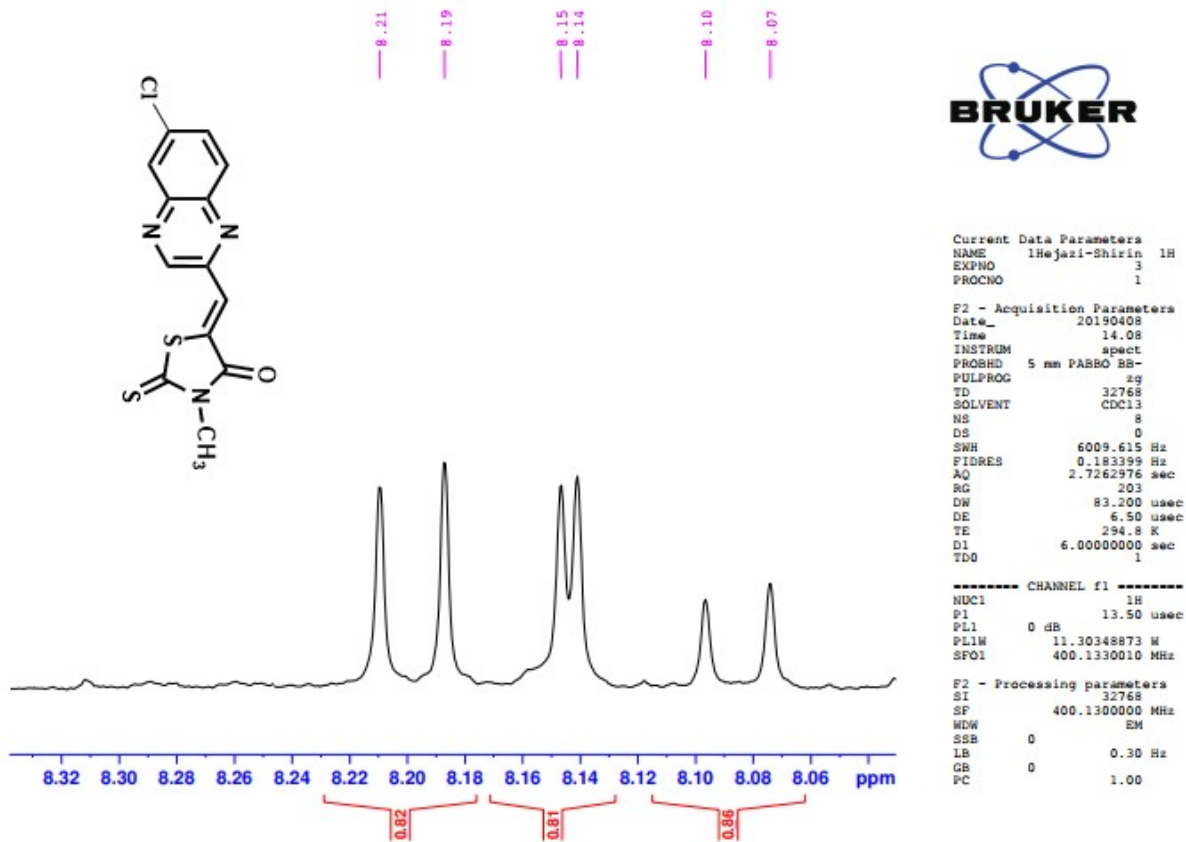

**Fig S62.** <sup>1</sup>H NMR expand Spectra. (Z)-5-((6-chloroquinoxalin-2-yl) methylene)-3-methyl-2-thioxothiazolidin-4-one (**L5a**)

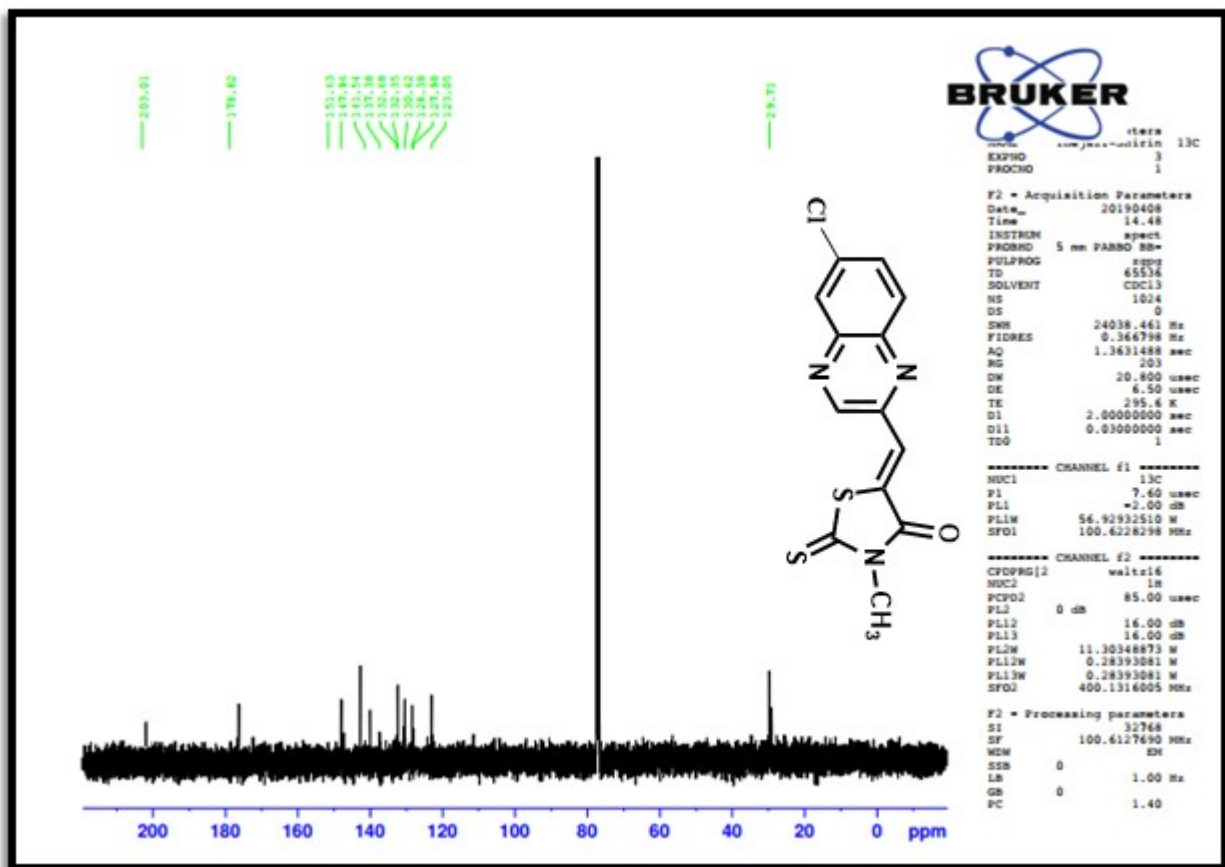

**Fig S63.**  $^{13}\text{C}$ NMR expand Spectra. (Z)-5-((6-chloroquinoxalin-2-yl)methylene)-3-methyl-2-thioxothiazolidin-4-one (**L5a**)

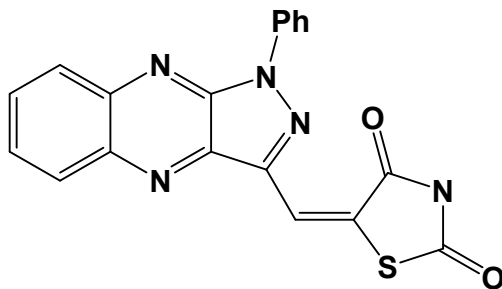

**5-((1-phenyl-1H-pyrazolo[3,4-b] quinoxalin-3-yl) methylene) thiazolidine-2,4-dione(L3a)** ;IR (KBr,  $\text{cm}^{-1}$ )  $\nu_{\text{max}}$ :3334.32 $\text{cm}^{-1}$ (NH),1509.99 $\text{cm}^{-1}$ (C=O),1424.17 $\text{cm}^{-1}$ (C=S);<sup>1</sup>H-NMR (500MHz, DMSO);  $\delta$ :9.36(s,1H, NH),8.28(s,1H, H-Vinyl),7.98(d,2H,  $j=8$ , H-2'and H-5'),7.81(d,2H,  $j=8$ , H-3'and H-4'),7.52-7.59(m,4H, H-2, H-3, H-5 and H-6),7.39(t,1H,  $j=14.5$ , H-4); <sup>13</sup>C-NMR (125MHz, DMSO);  $\delta$ :119.5,122.4,126.6,130.1 (Aromatic carbons ring D),127.6,129.8 (Aromatic carbons ring A),142.9,143.8,152.7 (Ring B),139.5 (Ring C),131.2 (C Vinyl),133.7 (C<sub>s</sub>),168.7 (C=O),183.6(C=S).

MH1 13CNMR in DMSO at 298k 1397/05/02

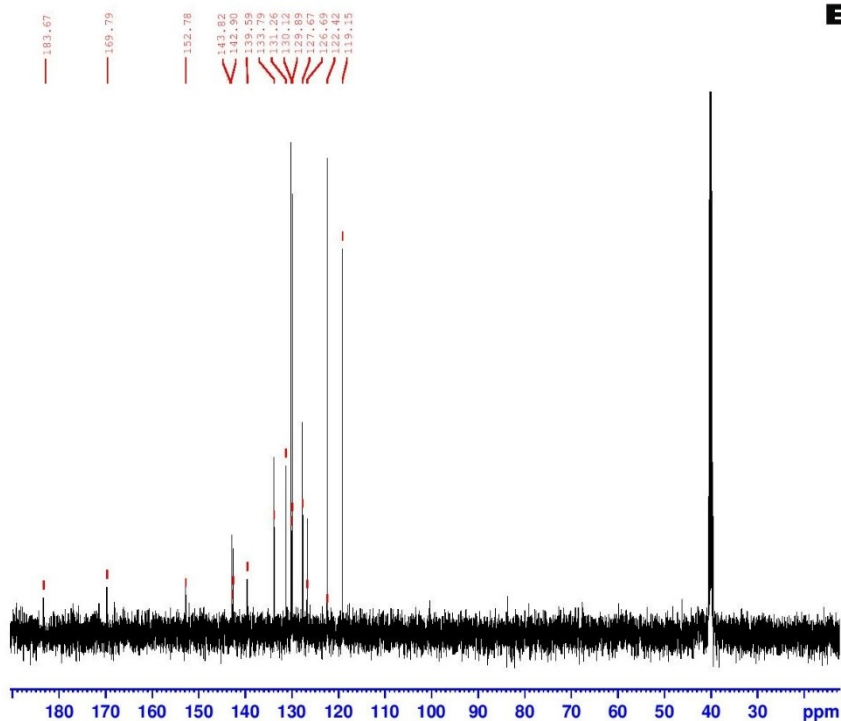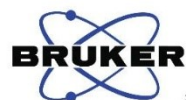

```
rameters
NAME      Ashoori-1
EXPNO     35
PROCNO    1

F2 - Acquisition Parameters
Date_     20180724
Time      12.38
INSTRUM   spect
PROBHD    5 mm QNP 1H/1
PULPROG   zgpg30
TD         65536
SOLVENT   DMSO
NS         256
DS         0
SWH        30030.029 Hz
FIDRES     0.458222 Hz
AQ         1.0911744 sec
RG         3649.1
DW         16.650 usec
DE         6.00 usec
TE         674.8 K
D1         1.00000000 sec
d11        0.03000000 sec
DELTA     0.89999998 sec
MCREST    0 sec
MCWRK     0.01500000 sec

===== CHANNEL f1 =====
NUC1      13C
P1        15.00 usec
PL1       -4.00 dB
SFO1      125.7703643 MHz

===== CHANNEL f2 =====
CPDPRG2   waltz16
NUC2      1H
PCPD2     80.00 usec
PL2       0 dB
PL12      15.50 dB
PL13      15.50 dB
SFO2      500.1320005 MHz

F2 - Processing parameters
SI        32768
SF        125.7577905 MHz
WDW       EM
SSB       0
LB        1.00 Hz
GB        0
PC        1.40
```

**Fig S68.** <sup>13</sup>CNMR Spectra. 5-((1-phenyl-1H-pyrazolo[3,4-b] quinoxalin-3-yl) methylene) thiazolidine-2,4-dione (**L3a**)

MH1 1HNMR in DMSO at 298 k 1397/05/02

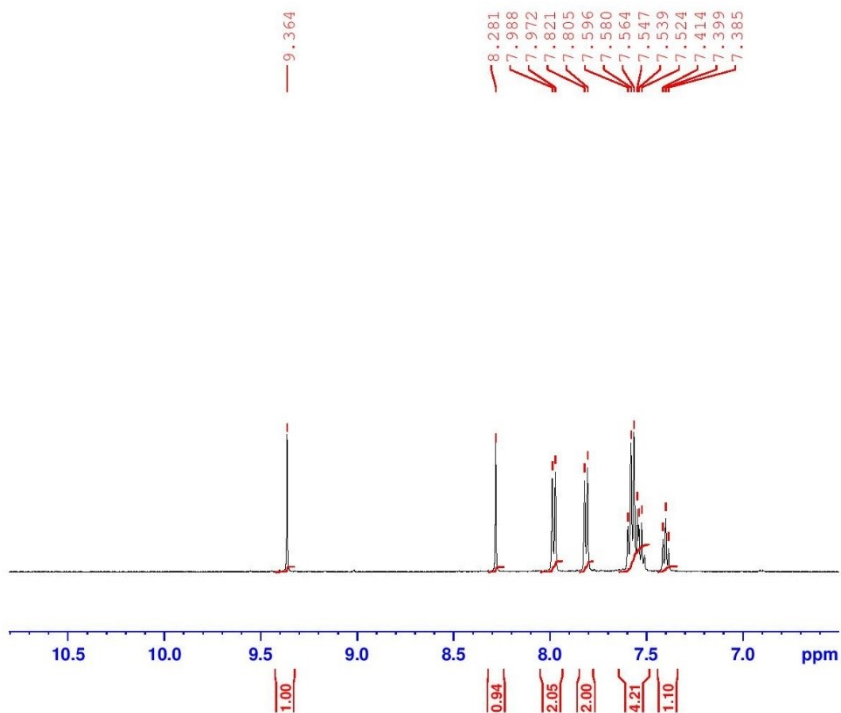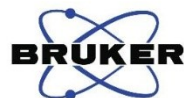

```
Current Data Parameters
NAME      Ashcori-1
EXPNO     34
PROCNO    1

F2 - Acquisition Parameters
Date_     20180724
Time      13.03
INSTRUM   spect
PROBHD    5 mm QNP 1H/1
PULPROG   zg30
ID        30988
SOLVENT   DMSO
NS        16
DS        0
SWH       10330.578 Hz
FIDRES    0.333374 Hz
AQ        1.4998192 sec
RG        1024
DW        48.400 usec
DE        6.00 usec
TE        674.8 K
D1        3.00000000 sec
MCREST    0 sec
MCWRK     0.01500000 sec

===== CHANNEL f1 =====
NUC1      1H
P1        10.50 usec
PL1       -3.00 dB
SFO1      500.130885 MHz

F2 - Processing parameters
SI        32768
SF        500.130043 MHz
WDW       EM
SSB       0
LB        0.30 Hz
GB        0
PC        1.00
```

**Fig S69.** <sup>1</sup>H NMR expand Spectra. 5-((1-phenyl-1H-pyrazolo[3,4-b] quinoxalin-3-yl) methylene) thiazolidine-2,4-dione (**L3a**)

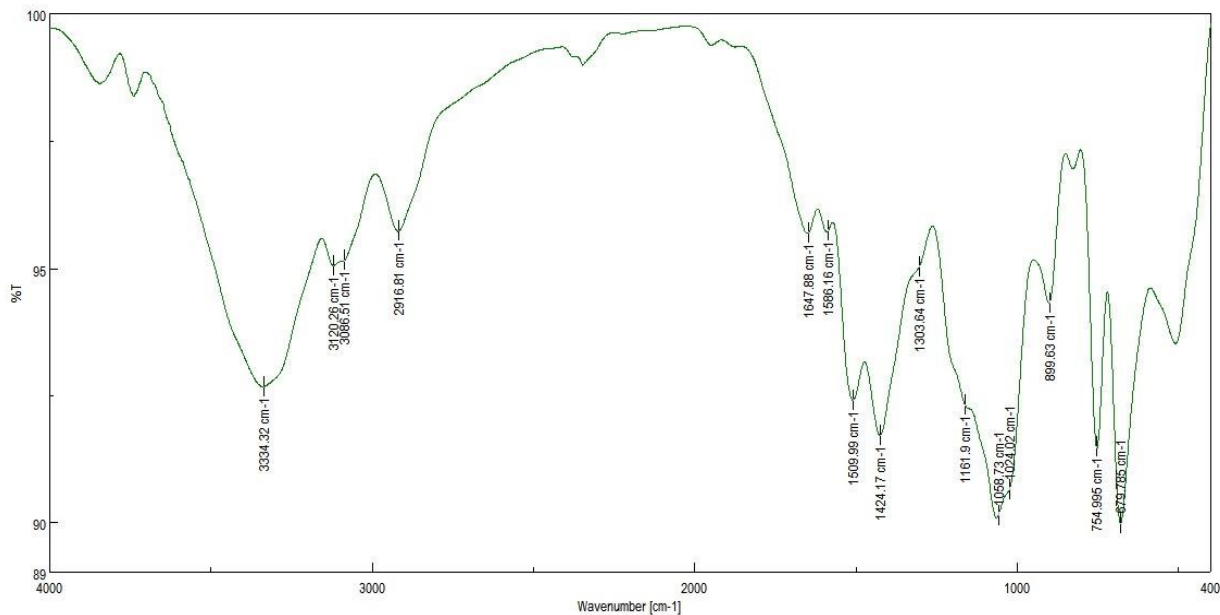

**Fig S70. FTIR Spectra.** 5-((1-phenyl-1H-pyrazolo[3,4-b] quinoxalin-3-yl) methylene) thiazolidine-2,4-dione (**L3a**)

**(Z)-3-(2-(4-Bromophenyl)-2-oxoethyl)-5-(quinoxalin-2-ylmethylene)imidazolidine-2,4-dione;** IR (KBr):  $\nu_{\max}$  = 3433 (NH), 2863 (CH aldehyde), 1728, 1700, 1694 (3 C=O), 1690-1647 (CH aromatic&olefinic, C=N), 1324 (C-N), 665 (C-Br)  $\text{cm}^{-1}$ ; <sup>1</sup>H NMR (400 MHz, DMSO):  $\delta$ 4.07 (s, 2H, CH<sub>2</sub>), 5.56 (s, 1H, NH), 7.19-7.54 (m, 4H, Ar-H), 7.72 (s, 1H, CH), 7.79 (d, 2H,  $J$  = 8.4 Hz, Ar-H), 7.98 (d, 2H,  $J$  = 8.4 Hz, Ar-H), 8.25 (s, 1H, NCH) ppm.

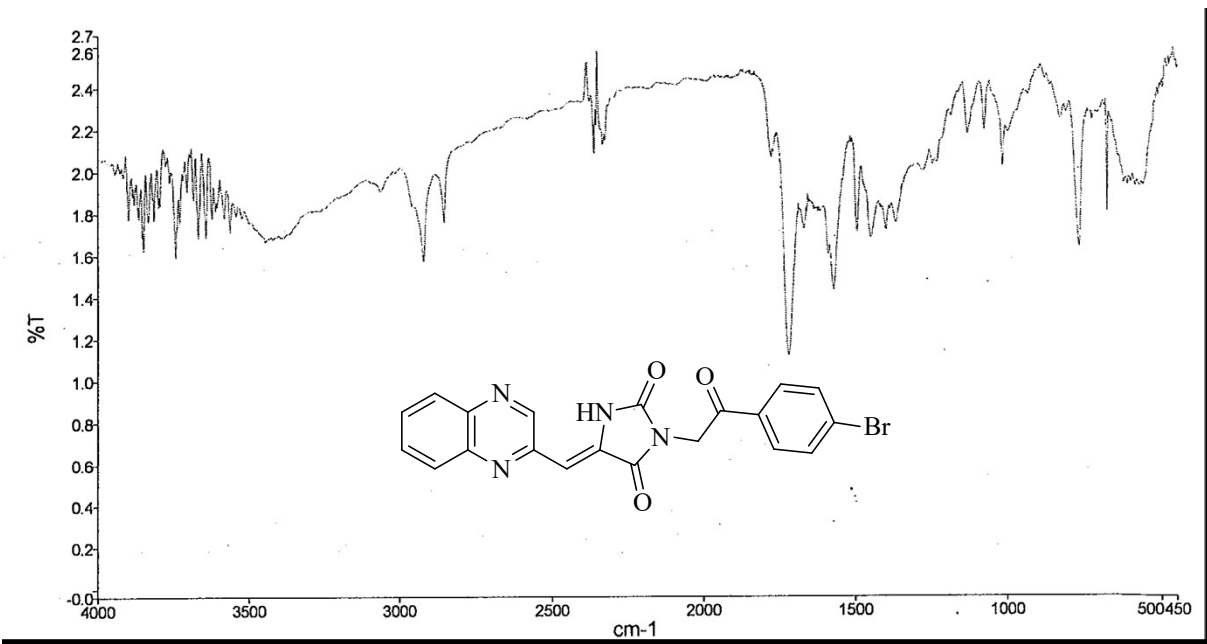

**Fig S71. FTIR Spectra.** (Z)-3-(2-(4-bromophenyl)-2-oxoethyl)-5-(quinoxalin-2-ylmethylene) imidazolidine-2,4-dione (**L3b**)

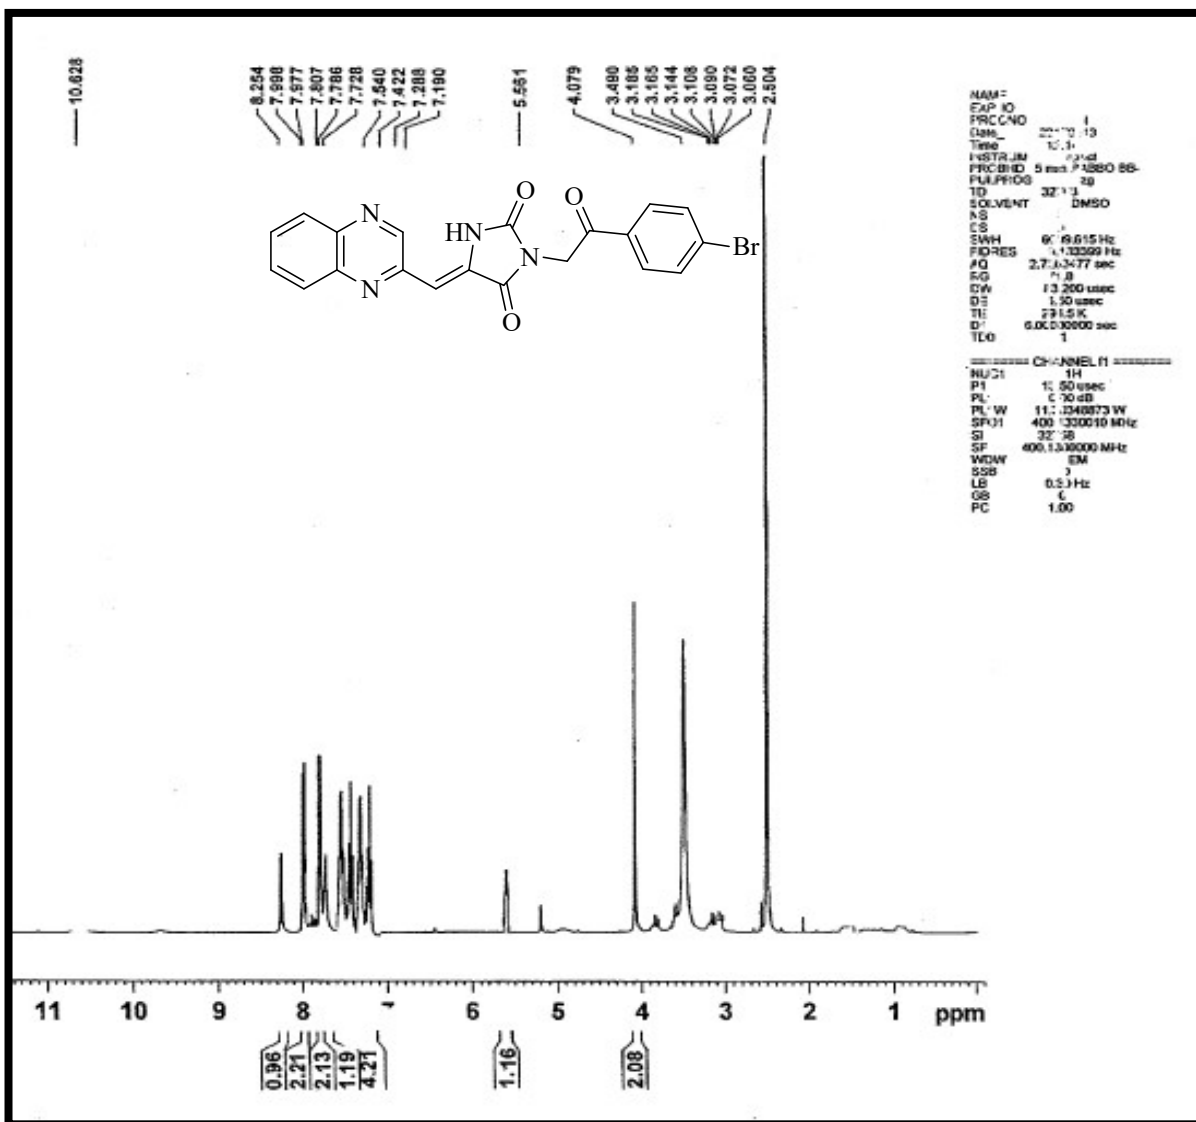

**Fig S72. <sup>1</sup>H NMR Spectra.** (Z)-3-(2-(4-bromophenyl)-2-oxoethyl)-5-(quinoxalin-2-ylmethylene)imidazolidine-2,4-dione (**L3b**)



**3-(2)- (E)-3-(2-(naphthalen-2-yl)-2-oxoethyl)-5-(quinoxalin-2-ylmethylene) imidazolidine-2,4-dione;** <sup>1</sup>H NMR (400 MHz, DMSO-d<sub>6</sub>) δ (ppm): 5.19(s, 1H, CH<sub>2</sub>) 6.90 (s, 1H, H<sub>vinyl</sub>), 7.59 (M, 2H, H- Phenyl), 7.73 (M, 3H, H- Phenyl), 7.80 (M, 2H, H- Phenyl) 8.04 (d, 1H, J = 8.8 Hz, 6 or 7-H Quinoxaline), 8.49 (d, 1H, J = 8.8 Hz, 5-H Quinoxaline), 8.22 (s, 1H, 8-H Quinoxaline), 9.13 (s, 1H, 3-H Quinoxaline), 9.25 (s, 1H, H<sub>NH</sub>).

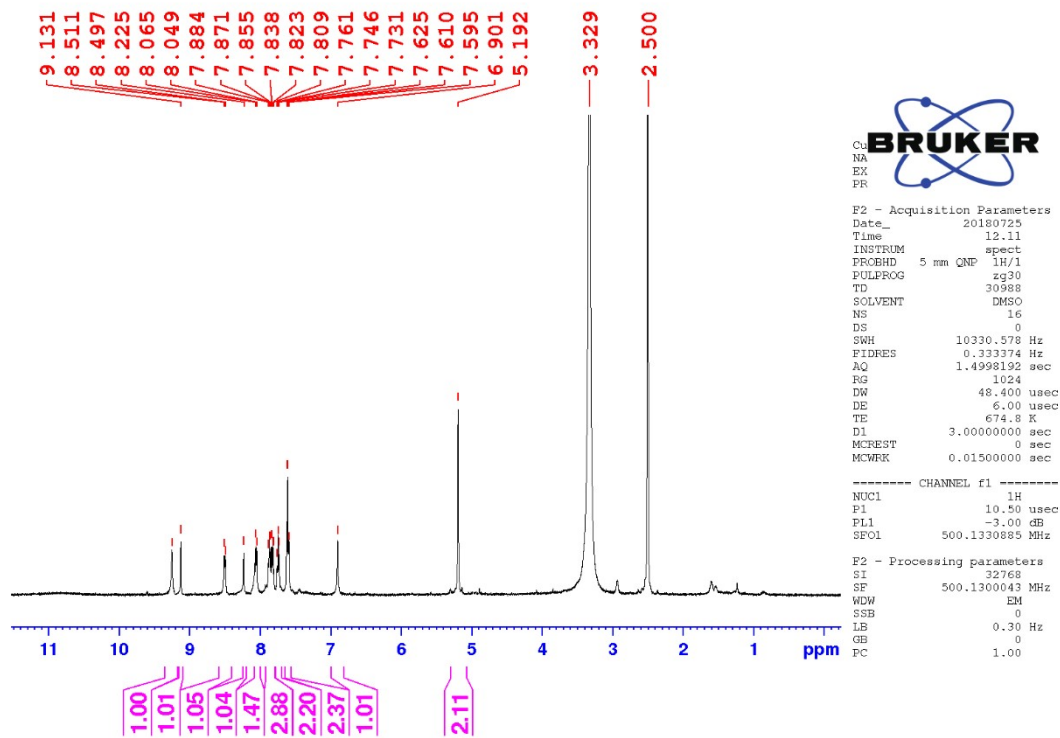

**Fig S78. <sup>1</sup>H NMR Spectra.** 3-(2)- (E)-3-(2-(naphthalen-2-yl)-2-oxoethyl)-5-(quinoxalin-2-ylmethylene) imidazolidine-2,4-dione (**L8c**)

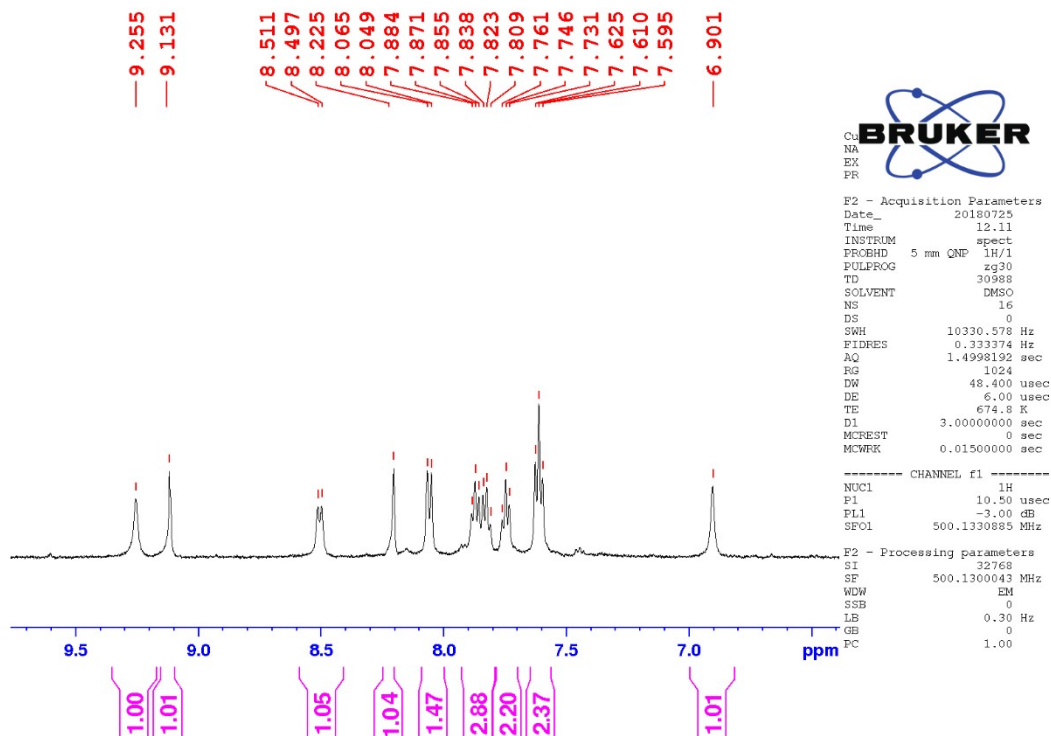

**Fig S79.**  $^1\text{H}$ NMR expand Spectra. 3-(2)- (E)-3-(2-(naphthalen-2-yl)-2-oxoethyl)-5-(quinoxalin-2-ylmethylene) imidazolidine-2,4-dione (**L8c**)

**(Z)-5-((6-chloroquinoxalin-2-yl)methylene)-3-ethyl-2-thioxothiazolidin-4-one;** IR (KBr,  $\text{cm}^{-1}$ )  $\nu$ : 2922(C-H aromatic), 1718(C=O), 1630(C=N), 1289(C=C).  $^1\text{H}$ NMR (400 MHz, DMSO  $d_6$ )  $\delta$  (ppm): 9.04(s, 1H, H-3 Quinoxaline), 8.02(d, 1H,  $J=8.8$  Hz H-8 Quinoxaline), 8.14(d, 1H,  $J=2.4$  Hz H-5 Quinoxaline), 7.85(s, 1H,  $H_{\text{C}=\text{C}}$ ), 8.08(d, 1H,  $J=8.8$  Hz H-7 Quinoxaline), 4.28(q, 2H,  $J=7.2$  Hz,  $\text{CH}_2$ ), 0.93(t, 3H,  $J=7.2$  Hz,  $\text{CH}_3$ ).  $^{13}\text{C}$  NMR (100 MHz, DMSO- $d_6$ )  $\delta$ : 14.13, 47.39, 124.46, 128.94, 132.20, 132.32, 136.17, 143.40, 147.07, 147.17, 147.94, 176.07, 207.03.

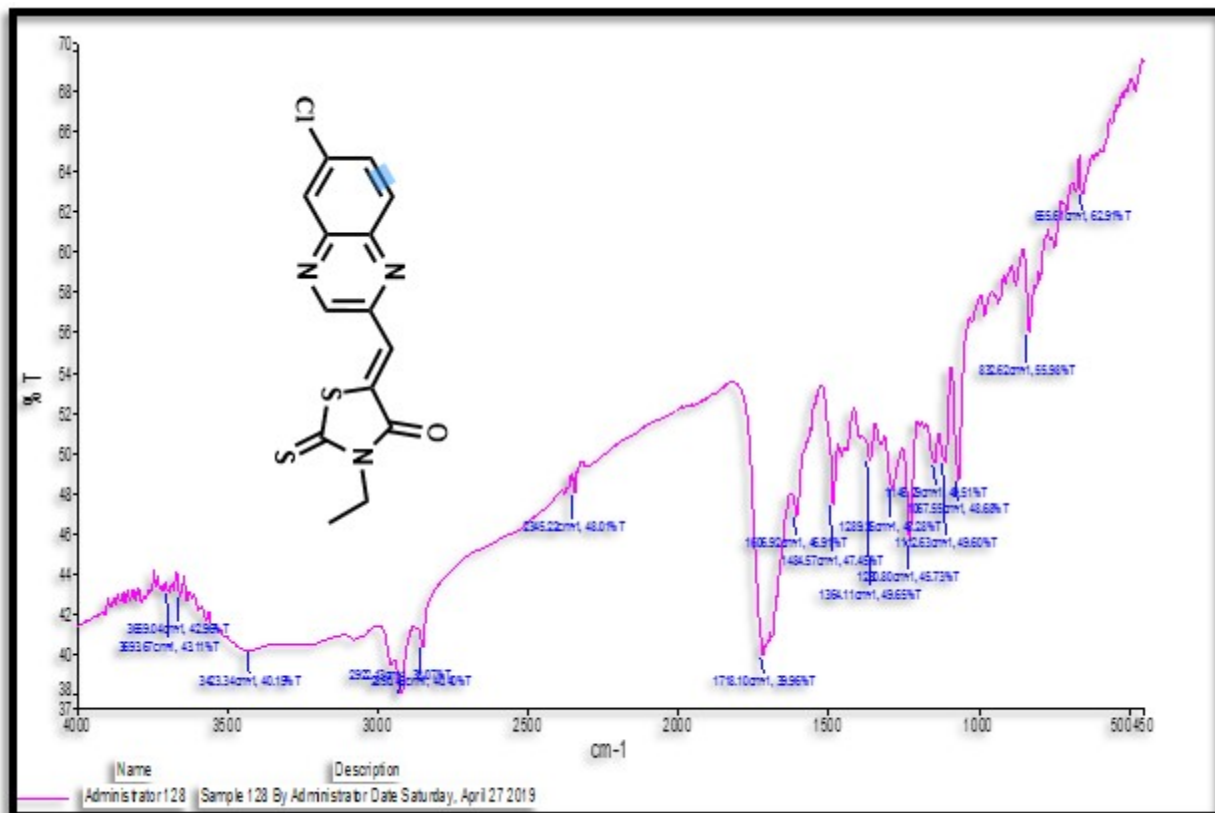

**Fig S80. FTIR Spectra.** (Z)-5-((6-chloroquinoxalin-2-yl)methylene)-3-ethyl-2-thioxothiazolidin-4-one (L7c)

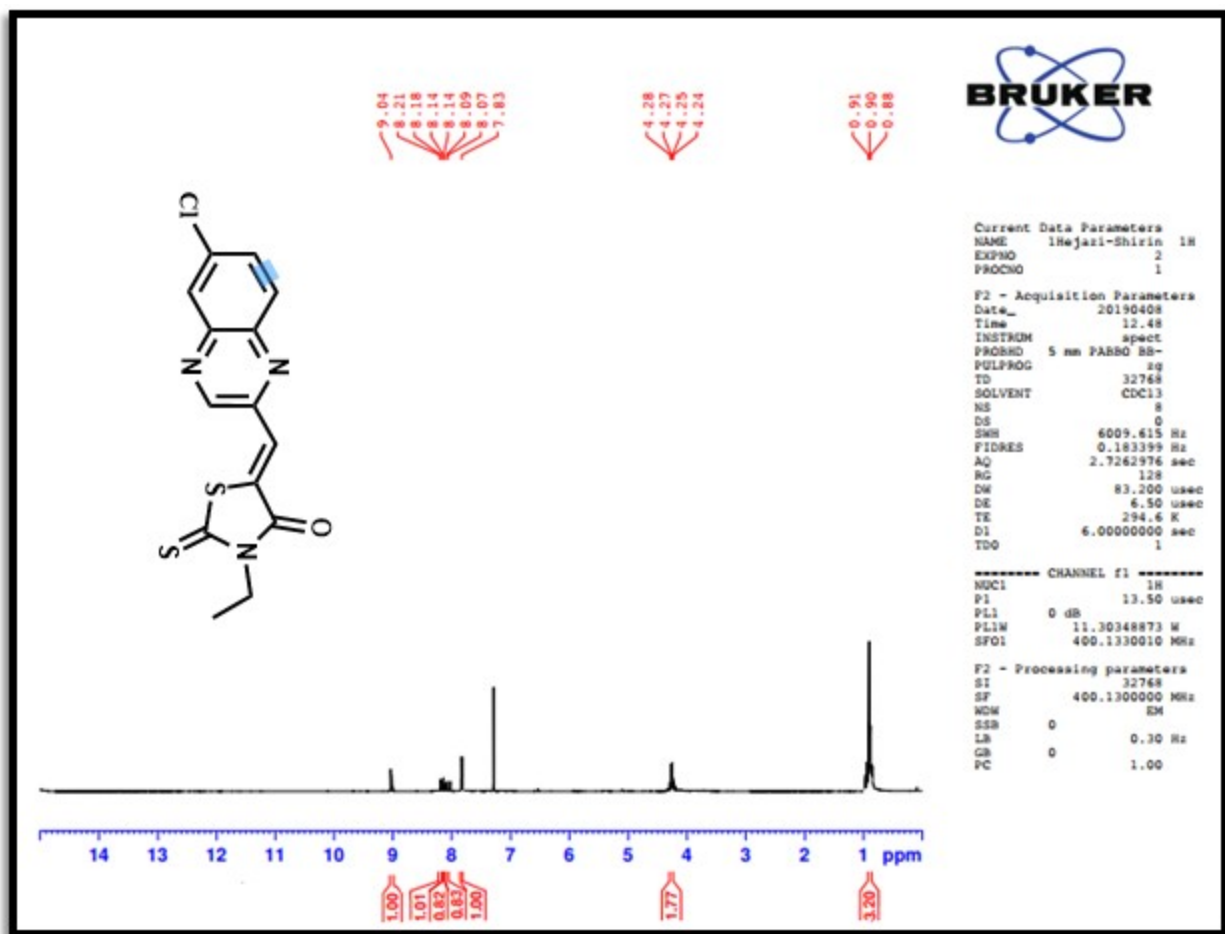

**Fig S81. <sup>1</sup>H NMR Spectra.** (Z)-5-((6-chloroquinoxalin-2-yl)methylene)-3-ethyl-2-thioxothiazolidin-4-one (L7c)

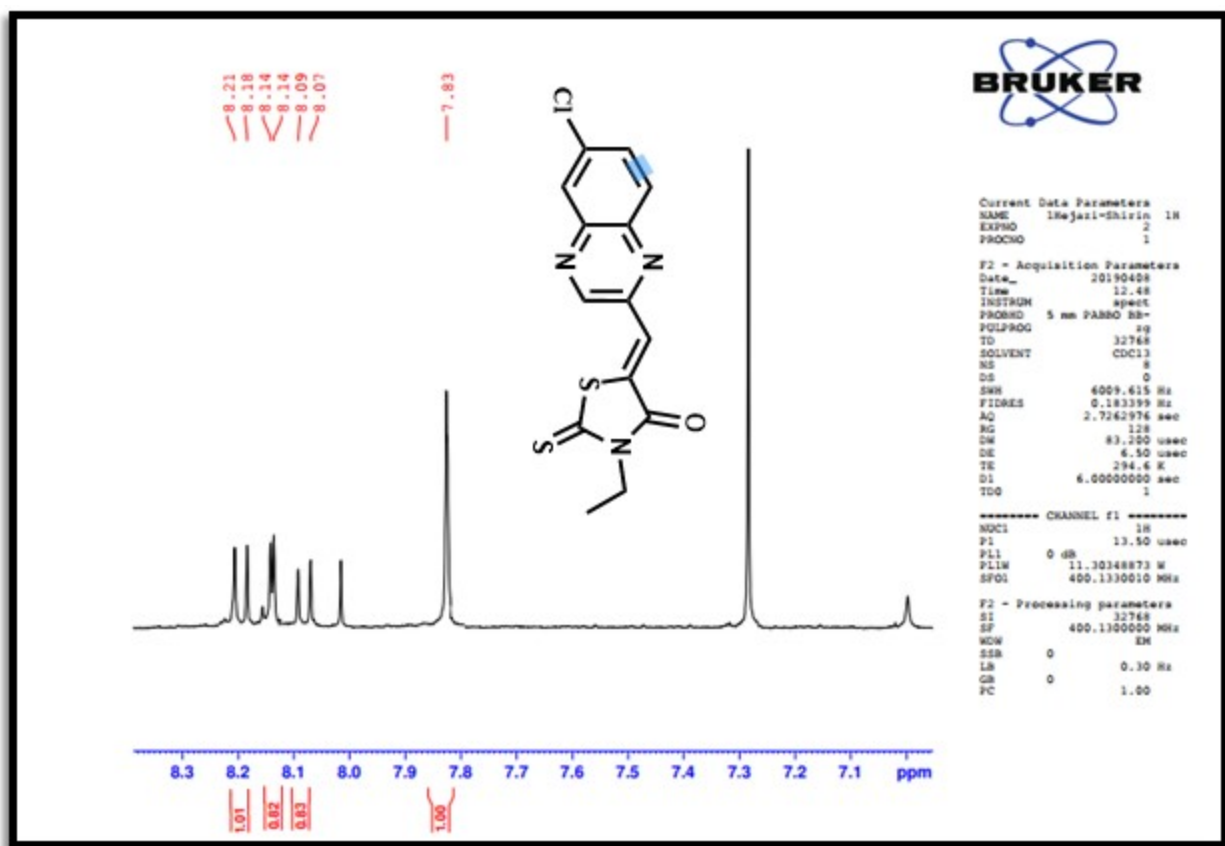

**Fig S82.** <sup>1</sup>H NMR expand Spectra. (Z)-5-((6-chloroquinoxalin-2-yl)methylene)-3-ethyl-2-thioxothiazolidin-4-one (**L7c**)

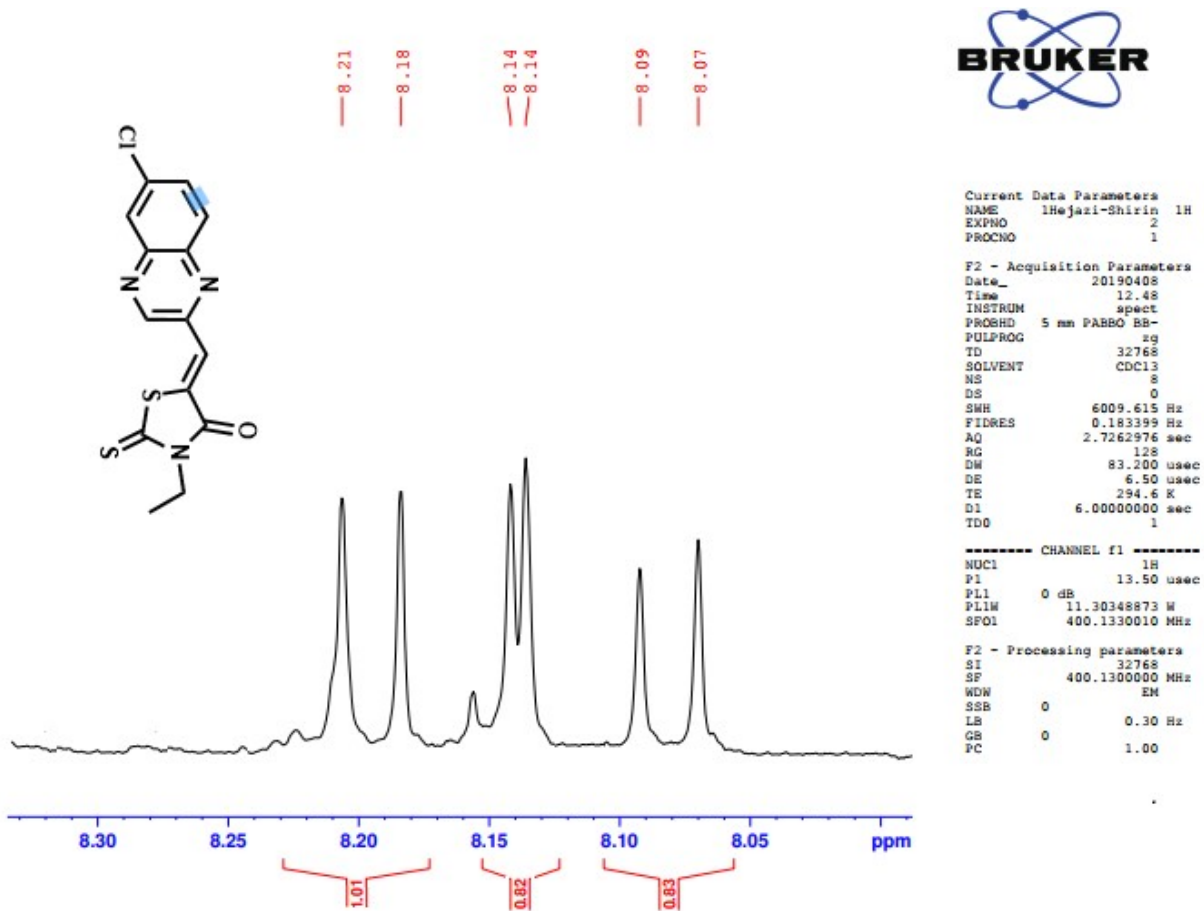

**Fig S83. <sup>1</sup>H NMR expand Spectra. (Z)-5-((6-chloroquinoxalin-2-yl)methylene)-3-ethyl-2-thioxothiazolidin-4-one (L7c)**

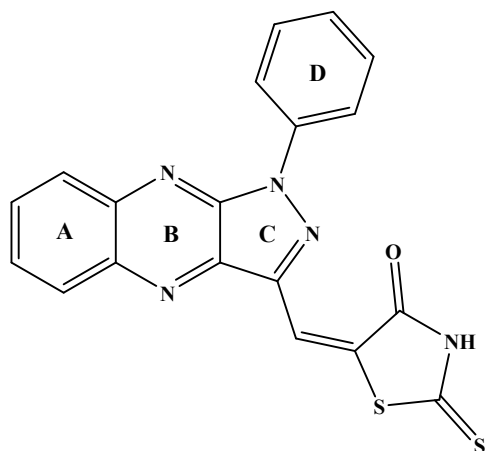

**5-((1-phenyl-1H-pyrazolo[3,4-b]quinoxalin-3-yl)methylene)-2-thioxothiazolidin-4-**

**one(2a);** IR(KBr,  $\text{cm}^{-1}$ ) $v_{\text{max}}$ :3334.32 $\text{cm}^{-1}$ (NH),1509.99 $\text{cm}^{-1}$ (C=O),1424.17 $\text{cm}^{-1}$ (C=S);  $^1\text{H-NMR}$  (500MHz,DMSO);  $\delta$ :9.36(s,1H,NH),8.28 (s,1H,H-Vinyl),7.98(d, 2H,  $j=8$ ,H-2' and H- 5'), 7.81(d,2H,  $j=8$ , H-3' and H-4'),7.52-7.59(m,4H, H-2, H-3, H-5 and H-6),7.39 (t,1H,  $j=14.5$ , H-4);  $^{13}\text{C-NMR}$  (125MHz, DMSO);  $\delta$ :119.15, 122.42, 126.69, 127.67(Aromatic carbons ring D), 129.89, 130.12(Aromatic carbons ring A), 131.26,133.79(Ring B), 139.59, 142.90, 143.82 (Ring C),152.76 (Vinyl), 152.78(C=C), 169.79(C=O), 183.67(C=S).



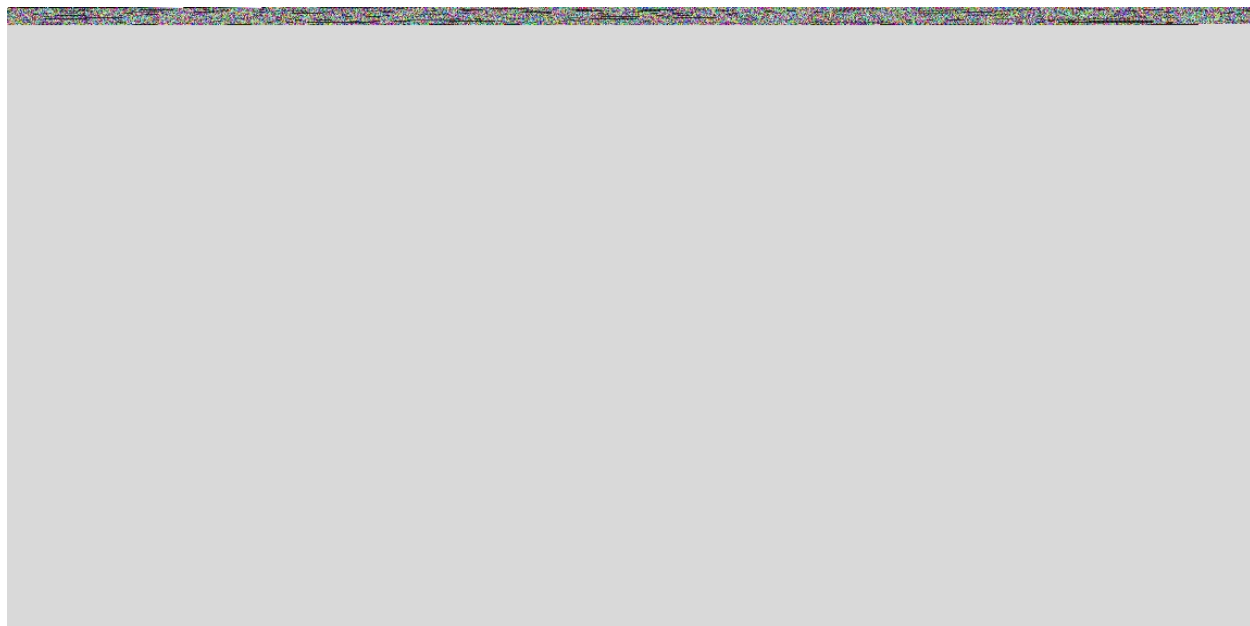

**Fig S84. FTIR Spectra.** 5-((1-phenyl-1H-pyrazolo[3,4-b]quinoxalin-3-yl)methylene)-2-thioxothiazolidin-4-one (**2a**)

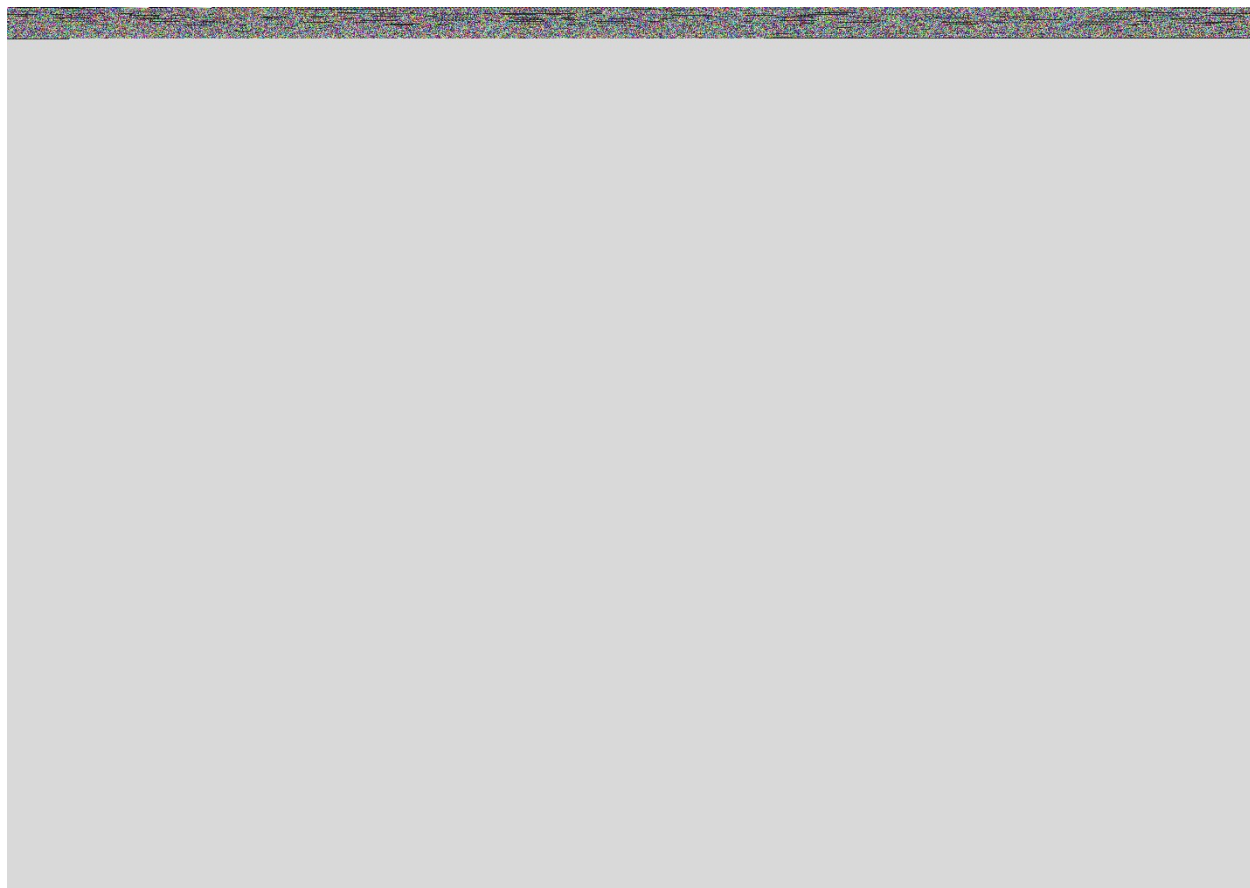

**Fig 86**  $^{13}\text{C}$ NMR Spectra. 5-((1-phenyl-1H-pyrazolo[3,4-b]quinoxalin-3-yl)methylene)-2-thioxothiazolidin-4-one(**2a**)

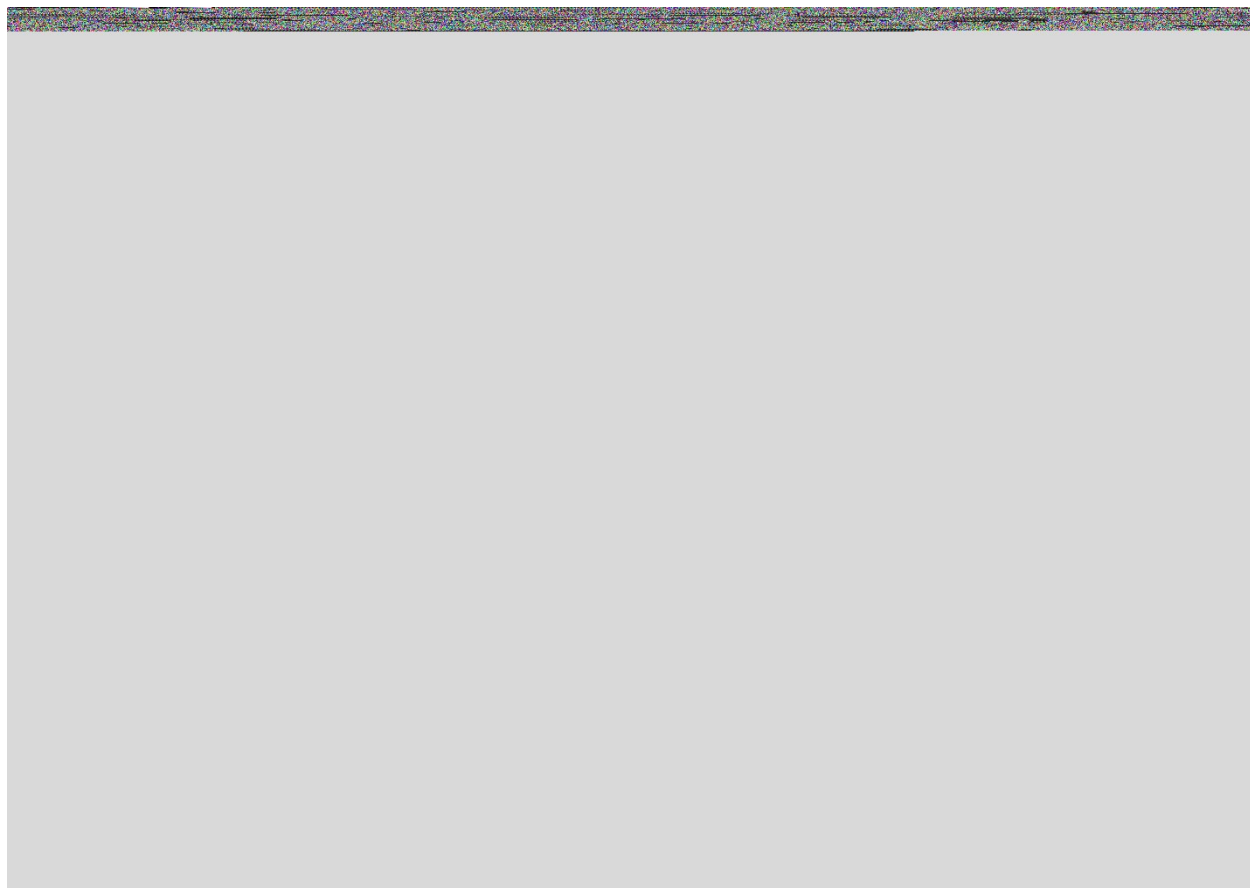

**Fig S87. <sup>1</sup>H NMR expand Spectra.** 5-((1-phenyl-1H-pyrazolo[3,4-b]quinoxalin-3-yl)methylene)-2-thioxothiazolidin-4-one (**2a**)
